# Supplementary material for: The curious case of a sterically crowded Stenhouse salt
Source: Royal Society of Chemistry journal article supplement (doi:10.1039/d2sc01895k), 2022-01-01
Supplement: d2sc01895k1.pdf [file d2sc01895k1.pdf]

## Electronic Supplementary Information

### The curious case of a sterically crowded Stenhouse salt

Valentin Thery,<sup>a</sup> Florian Molton,<sup>a</sup> Selim Sirach,<sup>a</sup> Neven Tillet,<sup>a</sup> Jacques Pecaut,<sup>b</sup> Eder Tomás-Mendivil<sup>\*a</sup> and David Martin<sup>\*a</sup>

<sup>a</sup>*Univ. Grenoble Alpes, CNRS, DCM, 38000 Grenoble, France.*

<sup>b</sup>*Univ. Grenoble Alpes, CEA, CNRS, INAC-SyMMES, UMR 5819 38000 Grenoble, France*

## Table of contents

|                                                        |    |
|--------------------------------------------------------|----|
| General methods and materials.....                     | 3  |
| Experimental procedures and characterization data..... | 4  |
| Electrochemical studies.....                           | 8  |
| UV-visible absorption spectra.....                     | 11 |
| X-ray diffraction studies.....                         | 12 |
| DFT studies.....                                       | 14 |
| NMR spectra.....                                       | 36 |
| References.....                                        | 46 |

## General methods and materials

All manipulations were performed -unless otherwise noted- under an atmosphere of dry argon using standard Schlenk or dry box techniques. Solvents were dried by standard methods (Na for ethers and toluene, and CaH<sub>2</sub> for the rest) and distilled under argon. <sup>1</sup>H, <sup>13</sup>C and <sup>19</sup>F NMR spectra were recorded on the NMR-ICMG platform of Grenoble with Bruker Avance 400 and 500 MHz spectrometers at 298 K. Chemical shifts are given in ppm and are referenced to SiMe<sub>4</sub> (<sup>1</sup>H, <sup>13</sup>C) and CFCI<sub>3</sub> (<sup>19</sup>F). Coupling constants *J* are given in Hertz as positive values. NMR multiplicities are abbreviated as follows: s = singlet, d = doublet, t = triplet, q = quartet, sept = septet, m = multiplet, br = broad signal. Melting points were measured with a Büchi B-545 melting point apparatus system. Infrared (IR) data were recorded on Perkin-Elmer GS2000 IR spectrophotometer with a Golden-Gate ATR unit in the solid state unless otherwise noted. The intensities of the selected peaks are abbreviated as follows: s = strong, m = medium, w = weak, br = broad. Mass spectra were recorded on a Waters Gevo X2-S Qtof mass spectrometer or on a Thermo Scientific LTQ Orbitrap XL mass spectrometer. Single crystal X-ray diffraction data were collected at CEA-Grenoble with a Rigaku XCallibur S instrument. For isolated products, UV-visible absorbance spectra were measured in a Varian Cary 300 Scan UV-vis spectrophotometer unless otherwise noted.

**CAACHBF<sub>4</sub>** and **CAAC** were prepared according to reported procedures<sup>1</sup> and cinnamoyl chloride and methyl trifluoromethanesulfonate were distilled before use; all other starting materials were purchased from commercial sources and used without further purification.

Electrochemical experiments run at 25 °C were carried out with a Biologic SP-300 potentiostat. Electrochemical experiments run at low temperatures were carried out with an Ivium technology potentiostat/galvanostat (compactStat). A silver reference electrode (0.01 M AgNO<sub>3</sub> in 0.1 M [<sup>18</sup>Bu<sub>4</sub>N]PF<sub>6</sub> in CH<sub>3</sub>CN) was used. Cyclic voltammetry experiments were performed in 0.1 M [<sup>18</sup>Bu<sub>4</sub>N]PF<sub>6</sub> CH<sub>3</sub>CN solution. A vitreous carbon disk (3 mm in diameter) as working electrode and a platinum wire as auxiliary electrode were employed. Ferrocene was used as standard, and all reduction potentials are reported with respect to the *E*<sub>1/2</sub> of the Fc/Fc<sup>+</sup> redox couple. Electrochemical bulk reactions were performed using reticulated vitreous carbon electrode. Electrochemical reactions performed at 25 °C were monitored with a Zeiss MCS 501 UV-NIR spectrophotometer (1 mm cell). Electrochemical reactions performed at low temperatures were monitored with an Avantes Avalight-DH-S-BAL spectrophotometer (2 mm cell). EPR spectra were obtained using an X-band Bruker EMX Plus spectrometer and fitted with the EasySpin simulation package.<sup>2</sup>

The *in situ* electrochemical EPR experiments were performed with an Ivium Compacstat potentiostat. The electrochemistry cell was composed of a commercial Wilmad aqueous flat cell closed by silicon caps and metal wires: silver wire for the pseudo-reference electrode, platinum wires for the working electrode and the counter electrode. The cell was filled and tightly closed under argon atmosphere in glove box before measurement in the EPR cavity. The sample volume was 150 µl. The studied compounds were dissolved at a concentration of 1mM in an electrolytic solution of degassed acetonitrile (Fisher Chemical) with TBAPF<sub>6</sub> (Sigma Aldrich) at 0.2M. The potential from the pseudo-reference was controlled by a ferrocene solution at the end of the experiment. X-band EPR spectra were recorded at room temperature with an EMX Bruker spectrometer equipped with a standard ER4102ST Bruker cavity.

The reaction at low temperature in order to observe **o-1** was monitored with an Avantes Avalight-DH-S-BAL spectrophotometer (2 mm cell).

## Experimental procedures and characterization data

### Synthesis of c-1:

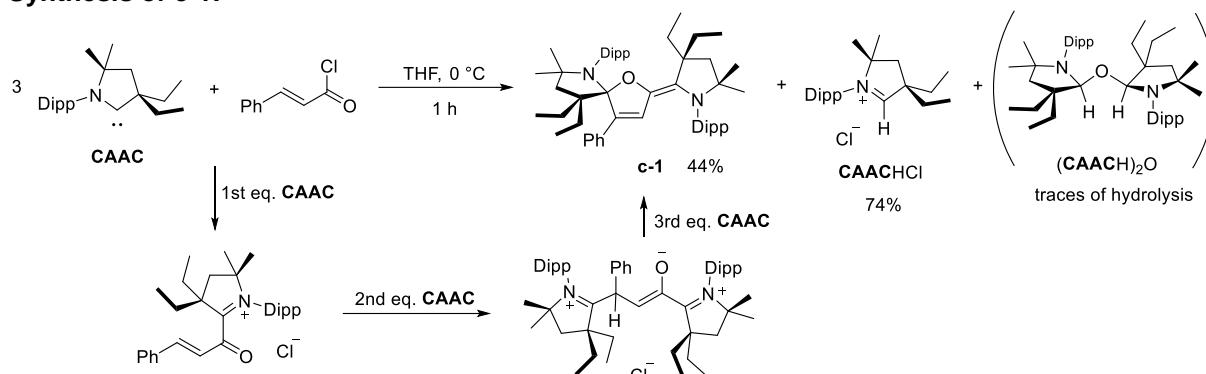

THF (10 mL) was added to a neat mixture of **CAAC** (0.752 g, 2.4 mmol, 3 eq.) and cinnamoyl chloride (0.131 g, 0.8 mmol) at 0 °C and the resulting mixture was stirred for 1 h at room temperature (until a green solution and abundant white to pale-yellow precipitate were obtained). The solution was concentrated to dryness under vacuum and the residue was extracted employing pentane (15 mL). The mother liquor was filtered by cannula into a new Schlenk flask (the solid that remained in the first flask is mainly **CAACH**-Cl iminium salt (74%)). After evaporation of pentane under vacuum, a yellow to greenish residue remained. Acetonitrile (5 mL) was added and the sticky syrup was pulverized until a pale-yellow powder crashed out and the solution turned slightly green. The solid was filtered through cannula and dried under vacuum. At this stage analysis of the solid by means of  $^1\text{H}$  NMR showed the presence of hydrolysis product (ca. 15-20%), namely **(CAACH) $_2$ O**, with a characteristic singlet at 4.63 ppm. *Note that since 3 equivalents of CAAC are employed with the accompanying traces of (CAACH) $_2$ O, the presence of such hydrolysis product may not be negligible at this point.* In order to remove the hydrolysis product, the pale-yellow solid was dissolved in the minimum amount of toluene and left in the freezer (-20 °C) until colorless crystals of **(CAACH) $_2$ O** appeared (a suitable single-crystal was measured by means of X-ray diffractometry for its unambiguous solid-state characterization). The mother liquor was filtered via cannula in cold (sodium chloride-ice bath) and volatiles were removed under vacuum. The obtained solid residue was pulverized in minimum acetonitrile, filtered through cannula and dried. Compound **c-1** was isolated as pale-yellow solid with a purity higher than 97% (0.266 g, 44% yield). *Note that compound c-1 is a pale-yellow solid, however upon exposition to air and dissolving in polar solvents, it tends to ring-open generating the OH adduct **1•H $^+$**  with traces of water and/or radical **o-1 $^+$**  in the air which are deep pink and red-brown solids, respectively.*

### Physical data:

**m. p.:** 159 °C

$^1\text{H}$  NMR (500 MHz,  $\text{CDCl}_3$ ):  $\delta$  (ppm) = 7.23 (dd,  $J$  = 7.6, 2.0 Hz, 1H), 7.19 (t,  $J$  = 7.6 Hz, 1H), 7.04-7.02 (m, 2H), 6.91-6.80 (m, 3H), 6.71 (t,  $J$  = 7.7 Hz, 2H), 5.89 (d,  $J$  = 7.1 Hz, 2H), 5.06 (s, 1H), 4.23 (sept,  $J$  = 6.6 Hz, 1H), 3.22-3.10 (m, 3H), 2.52 (sext,  $J$  = 7.4, 7.1 Hz, 1H), 2.22-2.12 (m, 3H), 2.07 (dd,  $J$  = 27.7, 12.6 Hz, 2H), 1.98 (dd,  $J$  = 13.4, 7.8 Hz, 1H), 1.92 (dd,  $J$  = 12.7, 3.7 Hz, 2H), 1.82 (sext,  $J$  = 7.7, 7.5 Hz, 1H), 1.52-1.44 (m, 2H), 1.46 (s, 3H), 1.43 (s, 3H), 1.32 (d,  $J$  = 6.6 Hz, 3H), 1.19 (d,  $J$  = 6.8 Hz, 3H), 1.16-1.06 (m, 18H), 0.95 (d,  $J$  = 6.6 Hz, 3H), 0.89 (td,  $J$  = 7.8, 3.9 Hz, 6H), 0.86 (s, 3H), 0.76 (d,  $J$  = 6.6 Hz, 3H), -0.27 (d,  $J$  = 6.7 Hz, 3H).

$^{13}\text{C}\{^1\text{H}\}$  NMR (126 MHz,  $\text{CDCl}_3$ ):  $\delta$  (ppm) = 152.9, 152.4, 149.7, 149.6, 139.0, 138.5, 138.2, 134.6, 134.5, 132.3, 131.4, 131.2, 127.2, 126.7, 126.6, 125.8, 125.3, 125.0, 124.6, 124.4, 118.3, 64.0, 61.7, 57.6, 49.5, 45.6, 43.6, 33.2, 32.8, 31.5, 31.1, 30.4, 29.8, 29.6, 28.2, 27.8, 27.7, 27.4, 26.8, 26.3, 26.2, 26.1, 25.6, 24.2, 22.6, 12.0, 11.0, 10.8, 10.7.

IR (neat): 2950 (s), 2871 (m), 1597 (w), 1463 (w)  $\text{cm}^{-1}$ .

HRMS (ESI):  $m/z$  calculated for:  $\text{C}_{53}\text{H}_{77}\text{ON}_2$  [ $\text{M}+\text{H}$ ] $^+$ : 757.60304; found 757.60186.

### Physical data for **(CAACH) $_2$ O**:

**m. p.:** 153 °C

$^1\text{H}$  NMR (500 MHz,  $\text{CDCl}_3$ ):  $\delta$  (ppm) = 7.22-7.17 (m, 4H), 7.11 (dd,  $J$  = 6.6, 2.8 Hz, 2H), 4.63 (s, 2H), 3.90 (sept,  $J$  = 6.7 Hz, 2H), 3.26 (sept,  $J$  = 6.7 Hz, 2H), 1.89 (d,  $J$  = 12.7 Hz, 2H), 1.86-1.81 (m, 2H), 1.55 (d,  $J$  = 12.7 Hz, 2H), 1.46-1.37 (m, 2H), 1.40 (d,  $J$  = 6.7 Hz, 6H), 1.28 (d,  $J$  = 6.7 Hz, 6H), 1.19 (d,  $J$  = 6.7 Hz, 6H), 1.19 (d,  $J$  = 6.8 Hz, 6H), 1.17 (s, 6H), 0.93 (s, 6H), 0.88 (t,  $J$  = 7.5 Hz, 6H), 0.86-0.79 (m, 2H), 0.71-0.64 (m, 2H), 0.27 (t,  $J$  = 7.5 Hz, 6H).

$^{13}\text{C}\{^1\text{H}\}$  NMR (126 MHz,  $\text{CDCl}_3$ ):  $\delta$  (ppm) = 152.8, 149.8, 139.8, 126.8, 124.6, 124.4, 99.3, 62.2, 50.7, 49.4, 33.5, 32.2, 29.8, 28.0, 27.6, 26.6, 26.1, 24.8, 10.6, 9.8.

IR (neat): 2971 (s), 2939 (s), 2871 (m), 1460 (m), 1437 (m), 1382 (w), 1361 (w), 1319 (w), 1186 (w), 1140 (w), 894 (m), 837 (m)  $\text{cm}^{-1}$ .

HRMS (ESI):  $m/z$  calculated for:  $\text{C}_{22}\text{H}_{36}\text{N}$  [( $\text{M}-\text{H}_2\text{O}$ )/2+ $\text{H}$ ] $^+$ : 314.28423 found 314.28386.

## Synthesis of [1•H<sup>+</sup>][OTf<sup>-</sup>]:

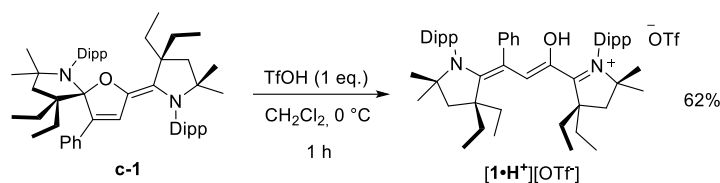

Compound **c-1** (0.035 g, 0.046 mmol) was dissolved in 2 mL of CH<sub>2</sub>Cl<sub>2</sub> and at 0 °C, trifluoromethanesulfonic acid (0.004 mL, 0.046 mmol) was added. The resulting deep pink-reddish solution was stirred for 1 h at room temperature. The solution was concentrated to dryness under vacuum and diethyl ether (5 mL) was added. Deep pink-violet solid crashed out from the solution; upon standing the formed microcrystals tend to shine, similar to the golden rain, due to the formation of pink plates that are almost translucent-yellowish on one face. The solid was filtered through canula and dried under vacuum. Compound [1•H<sup>+</sup>][OTf<sup>-</sup>] was isolated as deep pink to violet powder (0.026 g, 62%). *Note that several attempts to obtain single-crystals of high quality for X-ray diffraction studies failed due to the formation of extremely thin plates. As shown below we decided to change the counter-anion to chloride in order to obtain better quality crystals.*

### Physical data:

**m. p.:** 196 °C

**<sup>1</sup>H NMR (500 MHz, CDCl<sub>3</sub>, 25 °C):** δ (ppm) = 7.42 (br, 1H), 7.22 (br, 1H), 7.15 (t, *J* = 7.7 Hz, 1H), 6.95 (d, *J* = 7.7 Hz, 5H), 6.86 (br, 2H), 6.36 (br, 2H), 2.68 (br, 1H), 2.60 (br, 2H), 2.50 (br, 2H), 2.28-2.14 (br, 8H), 2.04 (br, 4H), 1.33 (s, 3H), 1.20 (br, 21H), 1.12 (br, 12H), 0.74 (br, 6H), 0.67 (d, *J* = 6.6 Hz, 6H).

**<sup>1</sup>H NMR (500 MHz, CDCl<sub>3</sub>, -38 °C):** δ (ppm) = 7.36 (s, 1H), 7.20 (t, *J* = 7.7 Hz, 1H), 7.14 (t, *J* = 7.7 Hz, 1H), 6.96-6.89 (m, 5H), 6.86 (t, *J* = 7.5 Hz, 2H), 6.30 (d, *J* = 7.3 Hz, 2H), 2.73 (s, 1H), 2.53 (sept, *J* = 6.4 Hz, 2H), 2.44 (sept, *J* = 6.4 Hz, 2H), 2.23 (s, 2H), 2.19 (s, 2H), 2.17-2.08 (m, 4H), 2.05-1.85 (m, 4H), 1.37-1.26 (m, 3H), 1.30 (s, 3H), 1.23-1.14 (m, 18H), 1.08 (t, *J* = 6.3 Hz, 10H), 0.85-0.78 (m, 2H), 0.67 (d, *J* = 6.3 Hz, 6H), 0.61 (d, *J* = 6.5 Hz, 6H).

**<sup>13</sup>C{<sup>1</sup>H} NMR (126 MHz, CDCl<sub>3</sub>, -38 °C):** δ (ppm) = 175.2, 171.5, 146.6, 143.9, 137.0, 134.1, 132.8, 132.3, 130.4, 129.7, 129.2, 128.6, 128.1, 125.5, 123.6, 121.9, 119.4, 109.5, 73.0, 68.3, 54.4, 53.8, 46.4, 44.2, 33.8, 32.9, 29.5, 29.5, 29.3, 28.8, 26.5, 24.8, 24.0, 23.1, 10.0, 8.8.

**<sup>19</sup>F{<sup>1</sup>H} NMR (470 MHz, CDCl<sub>3</sub>):** δ (ppm) = -78.0 (s).

**IR (neat):** 3497 (s), 2973 (s), 2873 (m), 1519 (w), 1390 (s), 1335 (s), 1267 (s), 1247 (s), 1128 (s), 1030 (s), 874 (m), 697 (m), 636 (s), 564 (m) cm<sup>-1</sup>

**HRMS (ESI):** *m/z* calculated for: C<sub>53</sub>H<sub>77</sub>ON<sub>2</sub> [M-(CF<sub>3</sub>SO<sub>3</sub>)<sup>+</sup>]: 757.60304; found 757.60195.

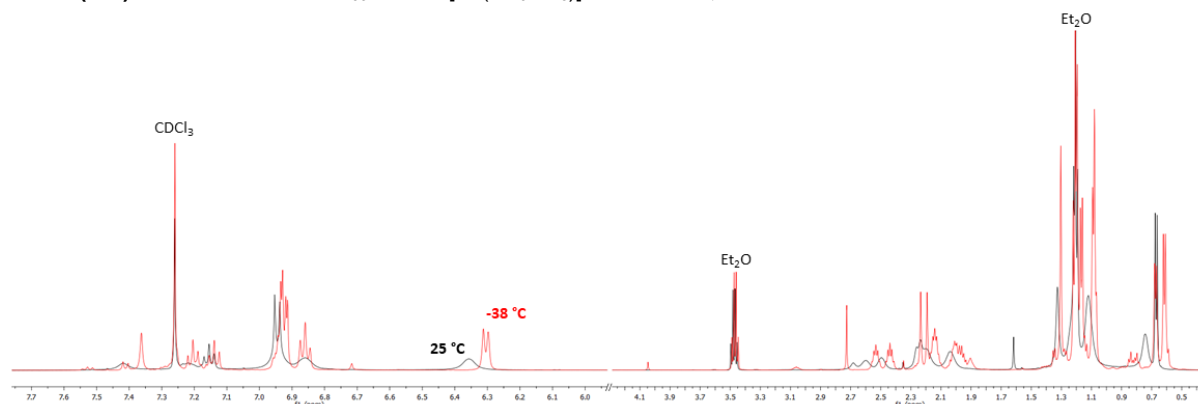

**Figure S1:** Superimposed <sup>1</sup>H NMR spectra of compound [1•H<sup>+</sup>][OTf<sup>-</sup>] at 25 °C (in black) and -38 °C (in red) in CDCl<sub>3</sub>.

## Synthesis of [1•H<sup>+</sup>][Cl<sup>-</sup>] for single-crystal X-ray diffraction studies:

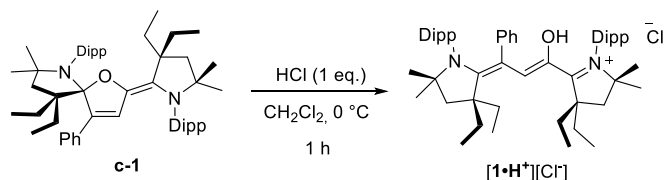

Compound **c-1** (0.047 g, 0.06 mmol) was dissolved in 2 mL of CH<sub>2</sub>Cl<sub>2</sub> and at 0 °C, HCl 2 M ethereal solution (0.03 mL, 0.06 mmol) was added. The resulting deep pink-reddish solution was stirred for 1 h at room temperature. The solution was concentrated to dryness under vacuum and diethyl ether (5 mL) was added. Deep pink-violet solid crashed out from the solution. The solid was filtered through canula and dried under vacuum. In order to obtain single-crystals, a saturated solution of salt [1•H<sup>+</sup>][Cl<sup>-</sup>] in CH<sub>2</sub>Cl<sub>2</sub> was layered with diethyl ether and stand at room temperature for slow diffusion.

### Physical data:

**m. p.:** 124 °C

## Synthesis of [1•Me<sup>+</sup>][OTf<sup>-</sup>]:

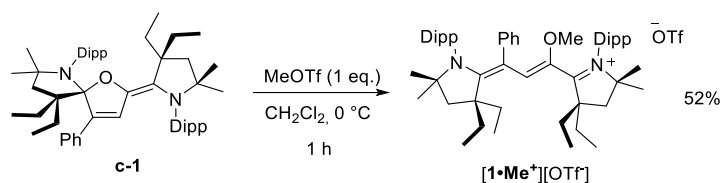

Compound **c-1** (0.035 g, 0.046 mmol) was dissolved in 2 mL of CH<sub>2</sub>Cl<sub>2</sub> and at 0 °C, methyl trifluoromethanesulfonate (0.005 mL, 0.046 mmol) was added. The resulting deep pink-reddish solution was stirred for 1 h at room temperature. The solution was concentrated to dryness under vacuum and diethyl ether (5 mL) was added. Deep pink-violet solid crashed out from the solution; upon standing the formed microcrystals tend to shine, similar to the golden rain, due to the formation of pink plates that are almost translucent-yellowish on one face. The solid was filtered through canula and dried under vacuum. Compound [1•Me<sup>+</sup>][OTf<sup>-</sup>] was isolated as deep pink to violet powder (0.022 g, 52%).

### Physical data:

**m. p.:** 212 °C.

**<sup>1</sup>H NMR (500 MHz, CDCl<sub>3</sub>):** δ (ppm) = 7.66 (s, 1H), 7.25-7.16 (m, 2H), 7.09 (d, *J* = 7.7 Hz, 2H), 6.95 (m, 3H), 6.84 (t, *J* = 7.2 Hz, 1H), 6.76 (t, *J* = 7.2 Hz, 1H), 6.43 (d, *J* = 7.4 Hz, 2H), 2.71-2.64 (m, 2H), 2.60-2.52 (m, 2H), 2.25 (s, 4H), 2.15-2.01 (m, 4H), 1.98-1.94 (m, 3H), 1.67 (s, 3H), 1.38-1.28 (m, 5H), 1.37 (s, 3H), 1.30 (s, 3H), 1.24-1.07 (m, 25H), 0.94 (br s, 5H), 0.78 (br s, 6H), 0.66 (d, *J* = 6.2 Hz, 2H).

**<sup>13</sup>C{<sup>1</sup>H} NMR (126 MHz, CDCl<sub>3</sub>):** δ (ppm) = 178.1, 177.3, 146.8, 144.7, 137.8, 137.3, 137.0, 135.3, 131.2, 129.6, 129.3, 128.9, 127.7, 126.6, 125.6, 125.4, 123.8, 122.5, 113.2, 72.9, 69.4, 59.8, 55.6, 55.2, 46.6, 44.3, 33.9, 33.4, 33.0, 30.0, 29.7, 29.5, 29.0, 26.9, 25.3, 24.9, 24.7, 23.3, 10.3, 10.2, 9.6.

**<sup>19</sup>F{<sup>1</sup>H} NMR (376 MHz, CD<sub>3</sub>CN):** δ (ppm) = -79.3 (s).

**IR (neat):** 2970 (m), 2878 (w), 1466 (w), 1389 (m), 1331 (s), 1267 (s), 1248 (s), 1127 (s), 1031 (s), 864 (m), 701 (m), 637 (m) cm<sup>-1</sup>.

**HRMS (ESI):** *m/z* calcd for C<sub>54</sub>H<sub>79</sub>ON<sub>2</sub> [M]<sup>+</sup>: 771.61869; found: 771.61758.

## Synthesis of [o-1<sup>•+</sup>][PF<sub>6</sub><sup>-</sup>]:

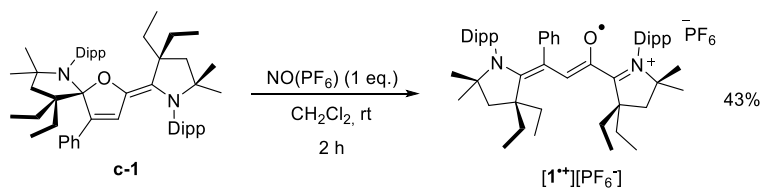

Compound **c-1** (0.035 g, 0.046 mmol) was dissolved in 2 mL of CH<sub>2</sub>Cl<sub>2</sub> and at room temperature, nitrosonium hexafluorophosphate (0.008 g, 0.046 mmol) was added. The resulting deep red solution was stirred for 2 h at room temperature. The solution was concentrated to ca. 0.5 mL under vacuum and diethyl ether (5 mL) was added. Dark red solid crashed out from the solution and it was filtered through canula and dried under vacuum. Compound [o-1<sup>•+</sup>][PF<sub>6</sub><sup>-</sup>] was isolated as dark red powder (0.018 g, 43%).

### Physical data:

**m. p.:** 142 °C

**IR (neat):** 2973 (s), 1473 (m), 1939 (m), 1334 (w), 1255 (w), 1027 (s), 836 (s), 556 (s) cm<sup>-1</sup>

**HRMS (ESI):** *m/z* calculated for: C<sub>53</sub>H<sub>77</sub>ON<sub>2</sub> [M+H]<sup>+</sup>: 757.60304; found 757.60150.

## Synthesis of o-1<sup>2+</sup>(PF<sub>6</sub>)<sub>2</sub>:

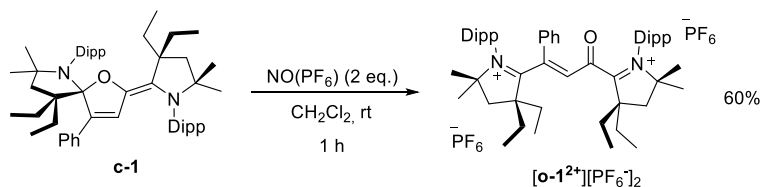

Compound **c-1** (0.035 g, 0.046 mmol) was dissolved in 2 mL of CH<sub>2</sub>Cl<sub>2</sub> and at room temperature, nitrosonium hexafluorophosphate (0.016 g, 0.092 mmol) was added. The resulting yellow solution was stirred for 1 h at room temperature. The solution was concentrated to ca. 0.5 mL under vacuum and diethyl ether (5 mL) was added. Yellow solid crashed out from the solution and it was filtered through canula and dried under vacuum. Compound [o-1<sup>2+</sup>][PF<sub>6</sub><sup>-</sup>]<sub>2</sub> was isolated as yellow powder (0.029 g, 60%).

### Physical data:

**m. p.:** 107 °C

$^1\text{H NMR}$  (500 MHz,  $\text{CD}_3\text{CN}$ ):  $\delta$  (ppm) = 7.74 (t,  $J = 7.8$  Hz, 2H), 7.58 (d,  $J = 7.8$  Hz, 2H), 7.52 (d,  $J = 7.9$  Hz, 2H), 7.38 (t,  $J = 7.6$  Hz, 1H), 7.15 (t,  $J = 7.7$  Hz, 2H), 6.49 (s, 1H), 6.28 (br s, 2H), 2.54 (sept,  $J = 6.5$  Hz, 2H), 2.52 (s, 2H), 2.48 (sept,  $J = 6.5$  Hz, 2H), 2.42 (s, 2H), 1.69-1.61 (m, 2H), 1.59 (s, 6H), 1.55-1.51 (m, 2H), 1.53 (s, 6H), 1.44-1.37 (m, 3H), 1.33 (d,  $J = 6.4$  Hz, 6H), 1.27 (d,  $J = 6.4$  Hz, 6H), 0.98-0.95 (m, 12H), 0.90 (t,  $J = 7.2$  Hz, 6H), 0.84 (br s, 6H).

$^{13}\text{C}\{^1\text{H}\}$  NMR (126 MHz,  $\text{CD}_3\text{CN}$ ):  $\delta$  (ppm) = 192.6, 192.1, 184.8, 150.5, 145.7, 144.8, 133.7, 133.7, 132.3, 132.0, 130.3, 130.1, 129.8, 129.0, 128.5, 128.3, 88.3, 88.1, 62.3, 59.7, 42.2, 40.2, 32.6, 31.2, 30.4, 30.3, 29.2, 29.0, 26.7, 25.4, 25.4, 25.1, 11.1, 9.2.

$^{19}\text{F NMR}$  (470 MHz,  $\text{CD}_3\text{CN}$ ):  $\delta$  (ppm) = -72.9 (d,  $J = 706.4$  Hz).

IR (neat): 2980 (m), 2951 (w), 1682 (w), 1622 (w), 1574 (w), 1469 (m), 1394 (w), 1337 (w), 1128 (w), 1045 (w), 834 (s), 556 (s)  $\text{cm}^{-1}$ .

HRMS (ESI):  $m/z$  calculated for:  $\text{C}_{53}\text{H}_{76}\text{ON}_2$   $[\text{M}-2(\text{PF}_6)]^{2+}$ : 378.29733; found 378.29683.

### Observation of **o-1**:

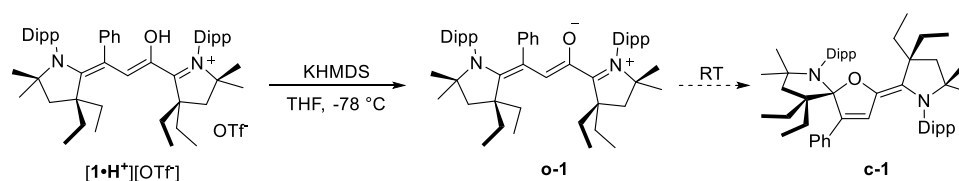

For the UV-visible spectroscopic observation and characterization of **o-1**, Stenhouse salt **[1-H<sup>+</sup>][OTf]** (ca. 1 mg) was dissolved in 20 mL of dry THF under Argon atmosphere at  $-78$  °C leading to a pink solution ( $\lambda_{\text{max}} = 530$  nm). The Schlenk flask was equipped with an UV-visible dip probe (2 mm path) for continuous monitoring of the reaction (see Figure S2). Upon addition of an excess of potassium bis(trimethylsilyl)amide in THF the reaction mixture instantaneously turned blue, attributed to **o-1** ( $\lambda_{\text{max}} = 610$  nm). The cold bath was then removed and the reaction mixture was allowed to reach room temperature. The blue colour slowly disappeared leading to a colourless solution with a band at 368 nm, which is characteristic of **c-1**.

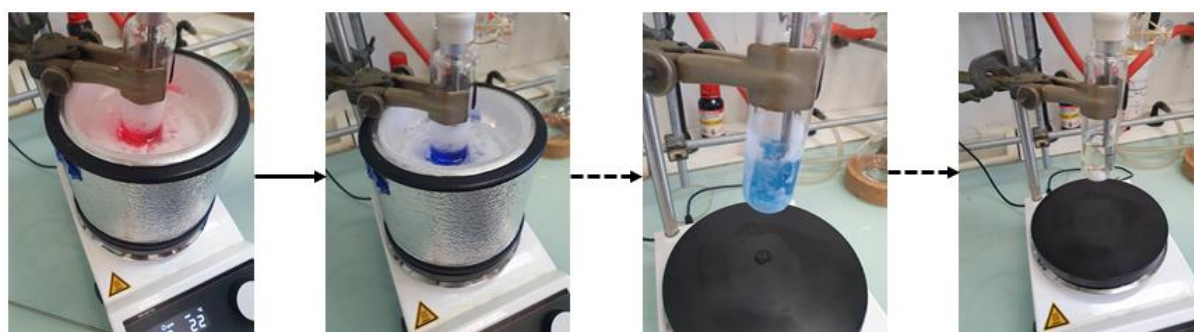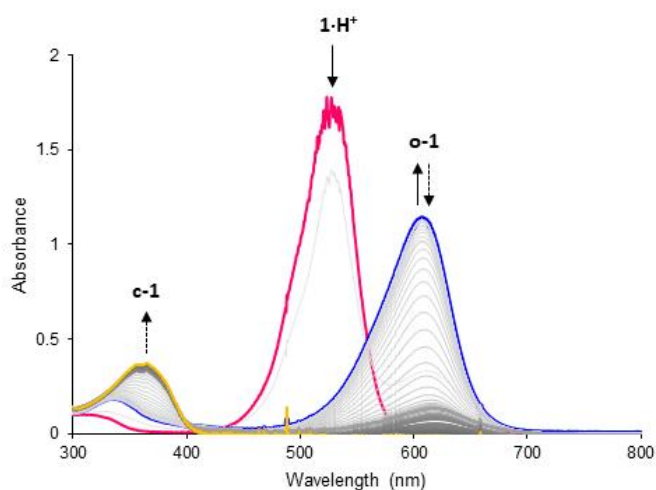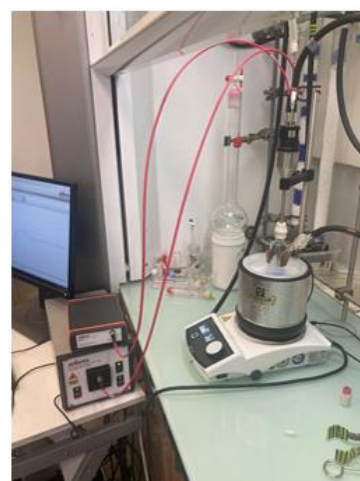

Figure S2: In situ monitoring of the reaction via UV-visible spectrometry.

## Electrochemical studies

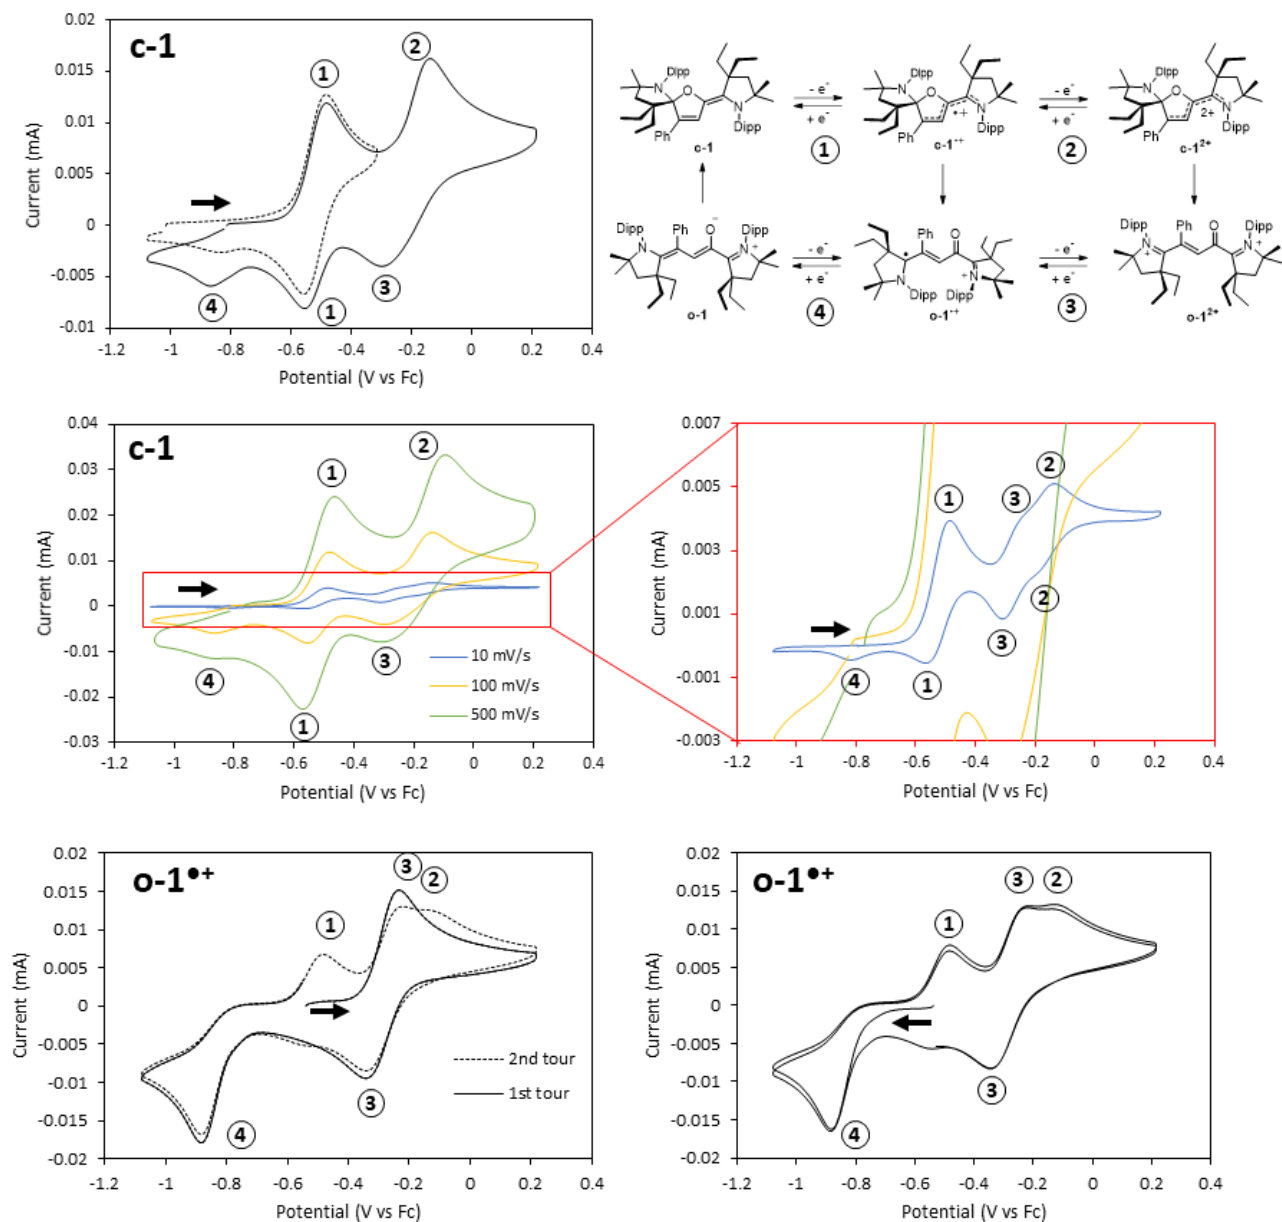

**Figure S3:** Up: Cyclic voltammogram of compound **c-1** (1 mM solution employing 0.1 M of <sup>t</sup>Bu<sub>4</sub>NPF<sub>6</sub> in acetonitrile electrolyte; 100 mV/s rate). Middle: Cyclic voltammograms of compound **c-1** at different rates (1 mM solution employing 0.1 M of <sup>t</sup>Bu<sub>4</sub>NPF<sub>6</sub> in acetonitrile electrolyte). Down: Cyclic voltammograms of compound **o-1<sup>•+</sup>** (1 mM solution employing 0.1 M of <sup>t</sup>Bu<sub>4</sub>NPF<sub>6</sub> in acetonitrile electrolyte; 100 mV/s rate). Radical cation **o-1<sup>•+</sup>** was generated by electrochemical reduction at  $E = -0.47$  V vs Fc of **c-1** on a reticulated vitreous carbon electrode, see Figure S4.

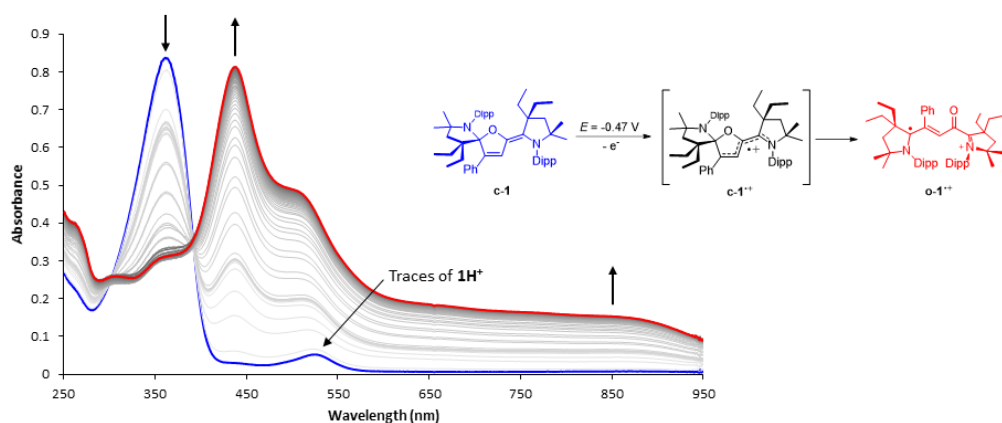

**Figure S4:** UV-vis monitoring of electrochemical reduction at  $E = -0.47$  V vs Fc of **c-1** on a reticulated vitreous carbon electrode (1 mM solution of **c-1** employing 0.1 M of <sup>t</sup>Bu<sub>4</sub>NPF<sub>6</sub> in acetonitrile electrolyte at room temperature).



0 °C

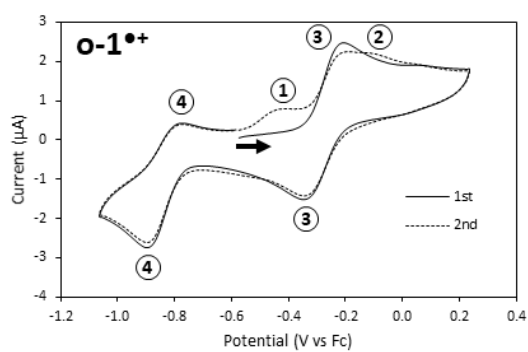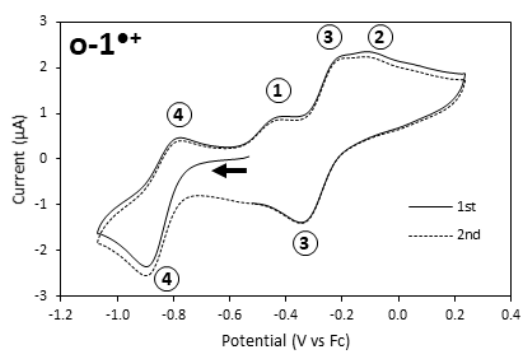

-10 °C

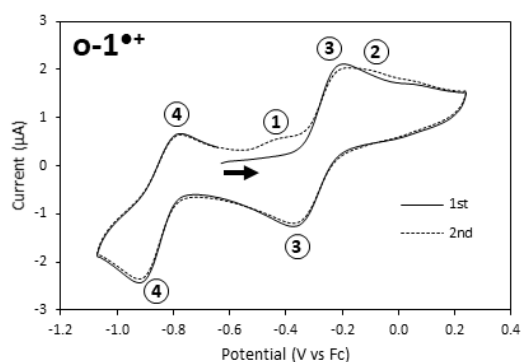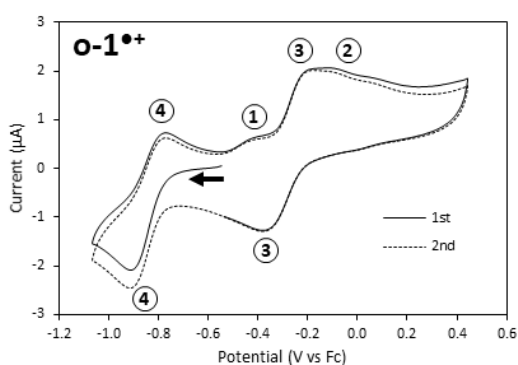

-20 °C

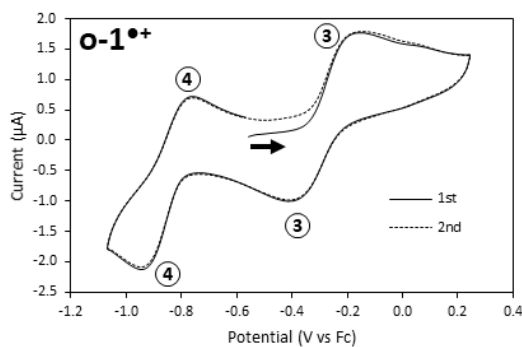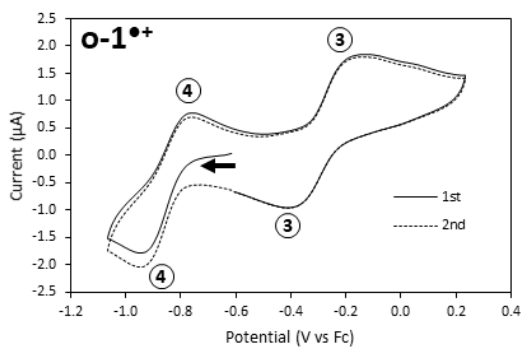

-30 °C

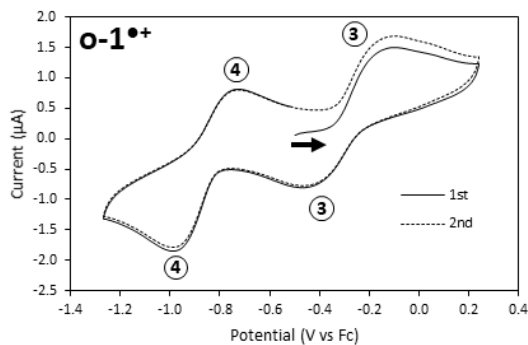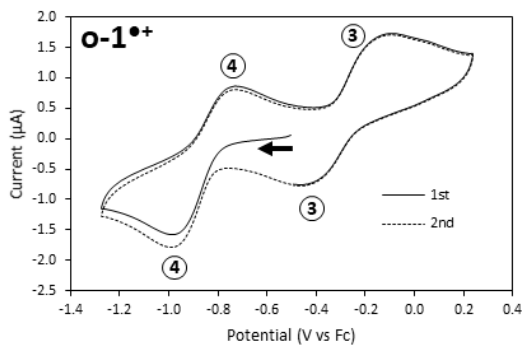

**Figure S5:** Cyclic voltammograms of compound **o-1•+** at different temperatures (1 mM solution employing 0.1 M of  ${}^n\text{Bu}_4\text{NPF}_6$  in acetonitrile electrolyte; 100 mV/s rate). Radical cation **o-1•+** was generated by electrochemical reduction at  $E = -0.47$  V vs Fc of **c-1** on a reticulated vitreous carbon electrode (1 mM solution of **c-1** employing 0.1 M of  ${}^n\text{Bu}_4\text{NPF}_6$  in acetonitrile electrolyte at room temperature).

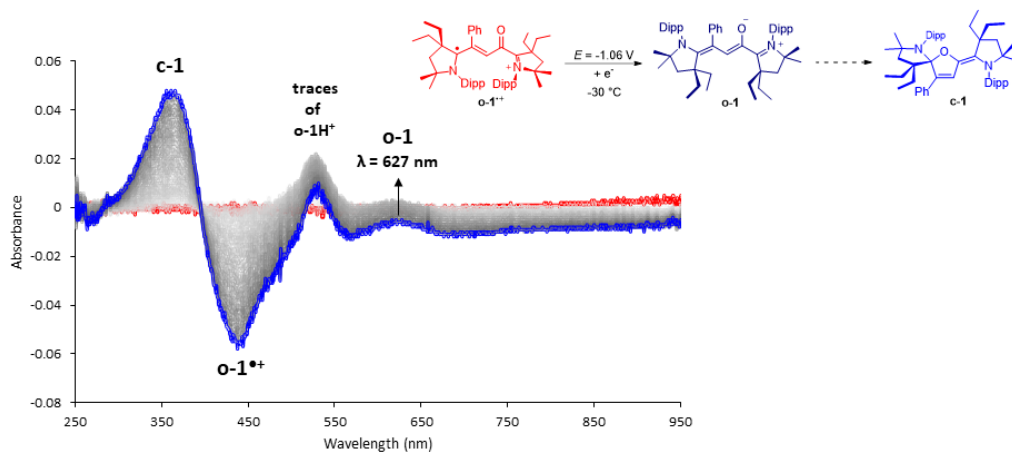

**Figure S6:** Early stages of the UV-vis monitoring of electrochemical reduction at  $E = -1.06$  V vs Fc of  $\mathbf{o-1}^{\bullet\bullet}$  on a reticulated vitreous carbon electrode (1 mM solution of  $\mathbf{o-1}^{\bullet\bullet}$  employing 0.1 M of  $\text{tBu}_4\text{NPF}_6$  in acetonitrile electrolyte at  $-30$  °C). For more sensitive observation of transient species (attributed to  $\mathbf{o-1}$  at 627 nm), the initial solution of substrate  $\mathbf{o-1}^{\bullet\bullet}$  was set as the blank (red line). Positive absorbances correspond to forming species, whether negative absorbances correspond to consuming species (grey to blue lines).

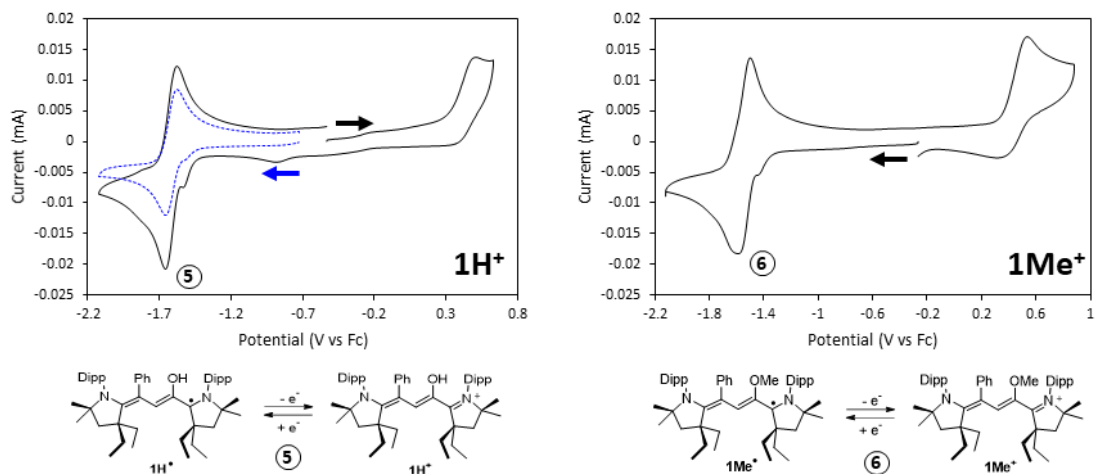

**Figure S7:** Cyclic voltammograms of salts  $[\mathbf{1}\cdot\mathbf{H}\cdot][\text{OTf}]$  and  $[\mathbf{1}\cdot\mathbf{Me}\cdot][\text{OTf}]$  (1 mM solution employing 0.1 M of  $\text{tBu}_4\text{NPF}_6$  in acetonitrile electrolyte; 100 mV/s rate).

## UV-visible absorption spectra

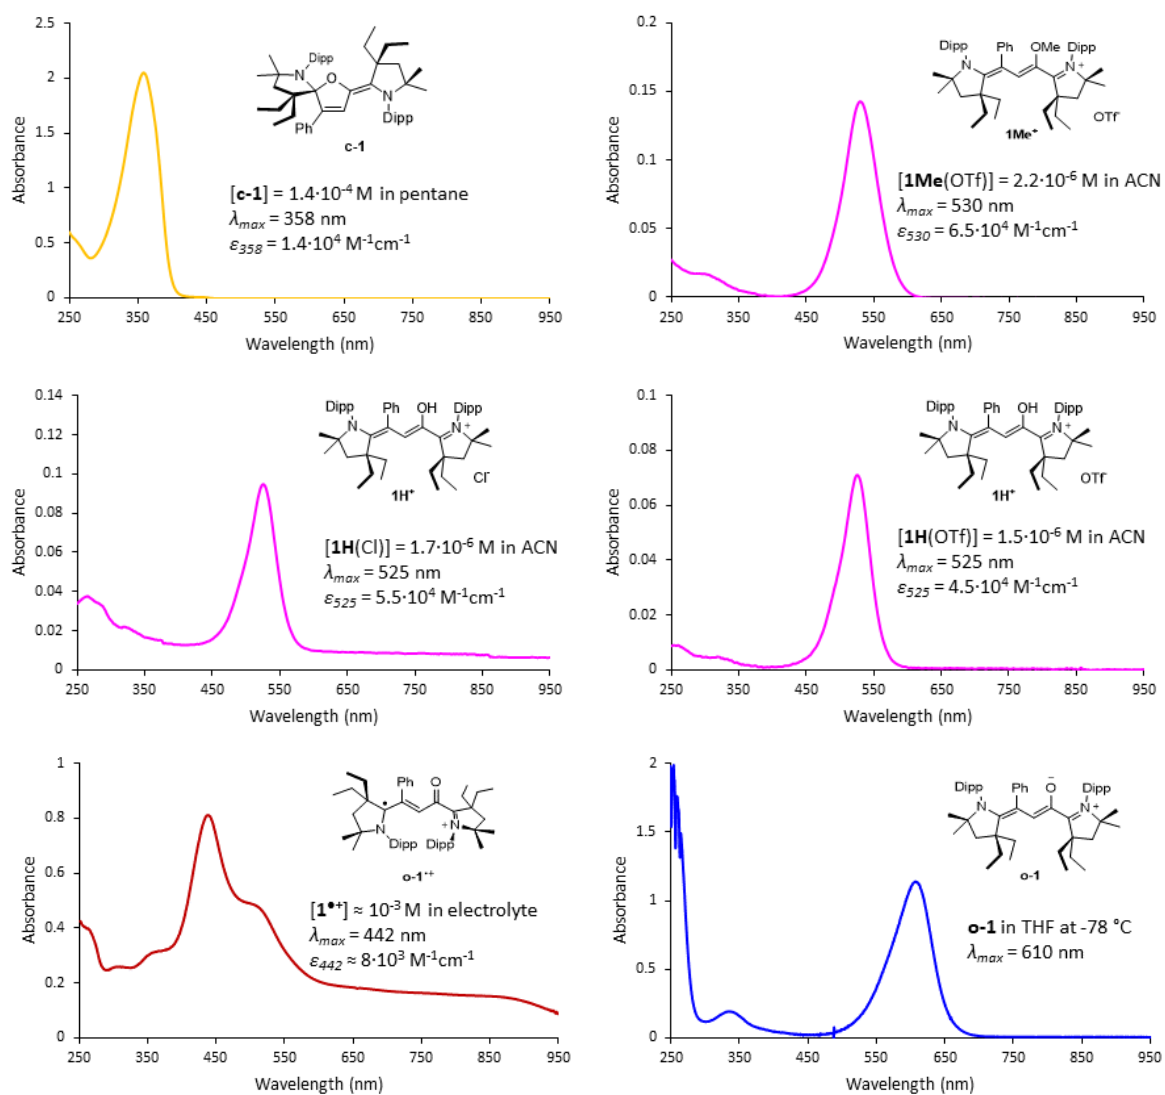

**Figure S8:** UV-visible absorption spectra of selected compounds (ACN = acetonitrile; electrolyte = a solution 0.1 M of <sup>t</sup>Bu<sub>4</sub>NPF<sub>6</sub> in acetonitrile).

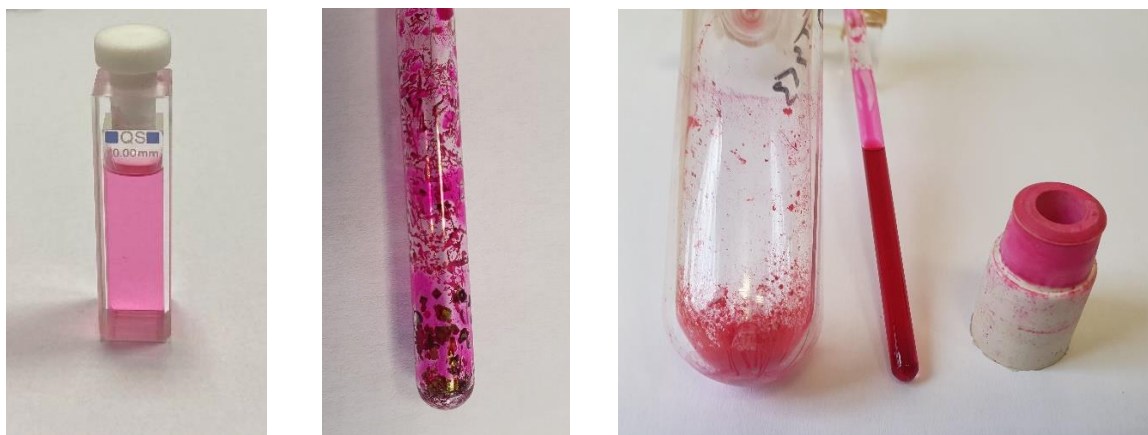

**Figure S9:** Appearance of Stenhouse salt  $[\mathbf{1H}^+][\text{OTf}^-]$  in solution and in the solid state. The methylated form  $[\mathbf{1Me}^+][\text{OTf}^-]$  looks identical. Note that upon exposure to air the septum employed during the synthesis of the closed form **c-1** turns pink; i. e. dye  $\mathbf{1H}^+$  is formed with its characteristic color.

## X-ray diffraction studies

Single crystals of **c-1** grew by slow diffusion of acetonitrile into a saturated solution of the compound in chloroform at room temperature. Crystals of [**1•H<sup>+</sup>**][Cl<sup>-</sup>] grew by slow diffusion of Et<sub>2</sub>O into a saturated solution of the salt in CH<sub>2</sub>Cl<sub>2</sub> at room temperature. Suitable single crystals of [**1•Me<sup>+</sup>**][OTf<sup>-</sup>] slowly grew from a saturated solution of the salt in Et<sub>2</sub>O kept at room temperature and obtained from the washing fractions during the work-up. Crystals of [**o-1<sup>2+</sup>**][PF<sub>6</sub>]<sub>2</sub> grew by slow diffusion of Et<sub>2</sub>O into a saturated solution of the salt in CH<sub>2</sub>Cl<sub>2</sub> at 4 °C. During the purification of **c-1**, the crude mixture containing the former compound and (CAACH)<sub>2</sub>O was dissolved in the minimum amount of toluene and left in the freezer (-20 °C) until colorless crystals of (CAACH)<sub>2</sub>O appeared.

Diffraction data were collected using a Rigaku XCallibur S Kappa area detector four-circle diffractometer (Mo-K<sub>α</sub> radiation λ = 0.71073 Å, graphite monochromator), controlled by the Rigaku CrysAlis CCD software.<sup>3</sup> Unique intensities with I > 10σ(I) detected on all frames using the Rigaku CrysAlis RED were used to refine the values of the cell parameters.

The substantial redundancy in data allows analytical absorption corrections to be applied using crystal shape determination for all compounds. The space group was determined from systematic absences, and it was confirmed by the successful resolution of the structure. The structures were solved by intrinsic phasing method using ShelXT software, in Olex1.2 environment.<sup>4,5</sup> All the atoms were found by difference Fourier syntheses. All non-hydrogen atoms were anisotropically refined on F<sup>2</sup> using ShelXL program.<sup>6</sup> Hydrogen atoms were fixed in ideal positions for compounds [**1•Me<sup>+</sup>**][OTf<sup>-</sup>], [**o-1<sup>2+</sup>**][PF<sub>6</sub>]<sub>2</sub> and [**1•H<sup>+</sup>**][Cl<sup>-</sup>] (except for hydroxide oxygen where hydrogen atom has been found by Fourier transform and refined isotropically) and found by Fourier transform and refined isotropically with a riding model for compound **c-1**.

CCDC 2163356-2163359 contain the supplementary crystallographic data for this paper. These data can be obtained free of charge from the Cambridge Crystallographic Data Center via [www.ccdc.cam.ac.uk/datarequest/cif](http://www.ccdc.cam.ac.uk/datarequest/cif).

**Table S1.** Crystal data for **c-1** and [**1•H<sup>+</sup>**][Cl<sup>-</sup>].

|                                             | <b>c-1</b>                                                     | [ <b>1•H<sup>+</sup></b> ][Cl <sup>-</sup> ]                    |
|---------------------------------------------|----------------------------------------------------------------|-----------------------------------------------------------------|
| CCDC                                        | 2163356                                                        | 2163357                                                         |
| Empirical formula                           | C <sub>53</sub> H <sub>76</sub> N <sub>2</sub> O               | C <sub>53</sub> H <sub>79</sub> ClN <sub>2</sub> O <sub>2</sub> |
| Formula weight                              | 757.15                                                         | 811.63                                                          |
| Temperature/K                               | 150.00(10)                                                     | 150.3(5)                                                        |
| Crystal system                              | triclinic                                                      | monoclinic                                                      |
| Space group                                 | P-1                                                            | P21/c                                                           |
| a/Å                                         | 14.2247(5)                                                     | 13.0058(6)                                                      |
| b/Å                                         | 18.7107(6)                                                     | 18.6532(8)                                                      |
| c/Å                                         | 19.0753(10)                                                    | 20.2559(8)                                                      |
| α/°                                         | 109.830(4)                                                     | 90                                                              |
| β/°                                         | 93.980(3)                                                      | 107.607(5)                                                      |
| γ/°                                         | 103.160(3)                                                     | 90                                                              |
| Volume/Å <sup>3</sup>                       | 4590.5(3)                                                      | 4683.9(4)                                                       |
| Z                                           | 4                                                              | 4                                                               |
| ρ <sub>calc</sub> /g/cm <sup>3</sup>        | 1.096                                                          | 1.151                                                           |
| μ/mm <sup>-1</sup>                          | 0.063                                                          | 0.123                                                           |
| F(000)                                      | 1664.0                                                         | 1776.0                                                          |
| Crystal size/mm <sup>3</sup>                | 0.31 × 0.19 × 0.16                                             | 0.27 × 0.08 × 0.05                                              |
| Radiation                                   | Mo K <sub>α</sub> (λ = 0.71073)                                | Mo K <sub>α</sub> (λ = 0.71073)                                 |
| 2θ range for data collection/°              | 3.884 to 52.744                                                | 3.944 to 52.744                                                 |
| Index ranges                                | -17 ≤ h ≤ 17, -23 ≤ k ≤ 22, -23 ≤ l ≤ 23                       | -16 ≤ h ≤ 12, -22 ≤ k ≤ 23, -25 ≤ l ≤ 25                        |
| Reflections collected                       | 41469                                                          | 22574                                                           |
| Independent reflections                     | 18741 [R <sub>int</sub> = 0.0518, R <sub>sigma</sub> = 0.0957] | 9580 [R <sub>int</sub> = 0.1072, R <sub>sigma</sub> = 0.1931]   |
| Data/restraints/parameters                  | 18741/0/1617                                                   | 9580/0/546                                                      |
| Goodness-of-fit on F <sup>2</sup>           | 1.013                                                          | 0.916                                                           |
| Final R indexes [I > 2σ(I)]                 | R <sub>1</sub> = 0.0595, wR <sub>2</sub> = 0.0948              | R <sub>1</sub> = 0.0640, wR <sub>2</sub> = 0.0926               |
| Final R indexes [all data]                  | R <sub>1</sub> = 0.1188, wR <sub>2</sub> = 0.1136              | R <sub>1</sub> = 0.1626, wR <sub>2</sub> = 0.1241               |
| Largest diff. peak/hole / e Å <sup>-3</sup> | 0.21/-0.20                                                     | 0.29/-0.27                                                      |

$$^a R_1 = \sum(|F_o| - |F_c|) / \sum|F_o|; \quad wR_2 = \{\sum[w(F_o^2 - F_c^2)^2] / \sum[w(F_o^2)^2]\}^{1/2}.$$

**Table S2.** Crystal data for **[1•Me<sup>+</sup>][OTf]** and **[o-1<sup>2+</sup>][PF<sub>6</sub>]<sub>2</sub>**.

|                                             | <b>[1•Me<sup>+</sup>][OTf]</b>                                                   | <b>[o-1<sup>2+</sup>][PF<sub>6</sub>]<sub>2</sub></b>                                          |
|---------------------------------------------|----------------------------------------------------------------------------------|------------------------------------------------------------------------------------------------|
| CCDC                                        | 2163358                                                                          | 2163359                                                                                        |
| Empirical formula                           | C <sub>57</sub> H <sub>84</sub> F <sub>3</sub> N <sub>2</sub> O <sub>4.5</sub> S | C <sub>54</sub> H <sub>78</sub> Cl <sub>2</sub> F <sub>12</sub> N <sub>2</sub> OP <sub>2</sub> |
| Formula weight                              | 958.32                                                                           | 1132.02                                                                                        |
| Temperature/K                               | 150.00(14)                                                                       | 150.00(14)                                                                                     |
| Crystal system                              | monoclinic                                                                       | monoclinic                                                                                     |
| Space group                                 | I2/a                                                                             | P2 <sub>1</sub> /n                                                                             |
| a/Å                                         | 17.3378(9)                                                                       | 12.1520(8)                                                                                     |
| b/Å                                         | 16.0403(10)                                                                      | 31.9515(18)                                                                                    |
| c/Å                                         | 38.924(2)                                                                        | 14.2567(7)                                                                                     |
| α/°                                         | 90                                                                               | 90                                                                                             |
| β/°                                         | 95.096(5)                                                                        | 97.129(5)                                                                                      |
| γ/°                                         | 90                                                                               | 90                                                                                             |
| Volume/Å <sup>3</sup>                       | 10782.0(11)                                                                      | 5492.7(6)                                                                                      |
| Z                                           | 8                                                                                | 4                                                                                              |
| ρ <sub>calc</sub> /cm <sup>3</sup>          | 1.181                                                                            | 1.369                                                                                          |
| μ/mm <sup>-1</sup>                          | 0.117                                                                            | 0.257                                                                                          |
| F(000)                                      | 4152.0                                                                           | 2384.0                                                                                         |
| Crystal size/mm <sup>3</sup>                | 0.539 × 0.245 × 0.015                                                            | 0.87 × 0.14 × 0.01                                                                             |
| Radiation                                   | Mo K <sub>α</sub> (λ = 0.71073)                                                  | Mo K <sub>α</sub> (λ = 0.71073)                                                                |
| 2θ range for data collection/°              | 4.048 to 52.744                                                                  | 2.1140 to 21.4940                                                                              |
| Index ranges                                | -13 ≤ h ≤ 21, -19 ≤ k ≤ 20, -48 ≤ l ≤ 43                                         | -15 ≤ h ≤ 15, -39 ≤ k ≤ 39, -17 ≤ l ≤ 17                                                       |
| Reflections collected                       | 24739                                                                            | 47920                                                                                          |
| Independent reflections                     | 11002 [R <sub>int</sub> = 0.0743, R <sub>sigma</sub> = 0.1286]                   | 11219 [R <sub>int</sub> = 0.1883, R <sub>sigma</sub> = 0.2034]                                 |
| Data/restraints/parameters                  | 11002/55/681                                                                     | 11219/0/674                                                                                    |
| Goodness-of-fit on F <sup>2</sup>           | 1.014                                                                            | 1.002                                                                                          |
| Final R indexes [I > 2σ (I)]                | R <sub>1</sub> = 0.0859, wR <sub>2</sub> = 0.2195                                | R <sub>1</sub> = 0.0942, wR <sub>2</sub> = 0.2009                                              |
| Final R indexes [all data]                  | R <sub>1</sub> = 0.1844, wR <sub>2</sub> = 0.2793                                | R <sub>1</sub> = 0.2151, wR <sub>2</sub> = 0.2575                                              |
| Largest diff. peak/hole / e Å <sup>-3</sup> | 0.83/-0.56                                                                       | 0.55/-0.43                                                                                     |

$$^a R_1 = \frac{\sum(|F_o| - |F_c|)}{\sum|F_o|}; \quad wR_2 = \left\{ \frac{\sum[w(F_o^2 - F_c^2)^2]}{\sum[w(F_o^2)]} \right\}^{1/2}.$$

**Table S3.** Crystal data for **(CAACH)<sub>2</sub>O**.

|             | <b>(CAACH)<sub>2</sub>O</b>      | <b>(CAACH)<sub>2</sub>O</b>             |
|-------------|----------------------------------|-----------------------------------------|
| CCDC        | <i>This work. Not deposited.</i> | <i>Previously deposited as 1967091.</i> |
| Space group | C2/c                             | C2/c                                    |
| a/Å         | 20.8603(6)                       | 20.8505(2)                              |
| b/Å         | 10.6975(3)                       | 10.70890(10)                            |
| c/Å         | 18.3341(7)                       | 18.3282(2)                              |
| α/°         | 90                               | 90                                      |
| β/°         | 103.231(4)                       | 103.1900(10)                            |
| γ/°         | 90                               | 90                                      |

## DFT studies

**General considerations:** The DFT calculations were performed with the program package Gaussian09.<sup>7</sup> All optimized structures were submitted to vibrational analysis and minima were characterized by the absence of imaginary frequencies. E is the absolute electronic energy with zero point energy correction (in hartrees). When not otherwise stated, optimizations were performed at the D3-B3LYP/6-311g(d,p) level of theory, including the D3 version of Grimme's dispersion<sup>8</sup> and the Polarizing Continuum Model (PCM) for acetonitrile as solvent.

EPR hyperfine constants were calculated on previously optimized structures of the most stable conformer, with a single point calculation at the D3-B3LYP/EPRII level of theory. The NBO 3.1 program for natural bond orbital (NBO) analyses<sup>9</sup> was used as implemented in Gaussian 09.

As shown below in table S4, the elongated C1–O1 bond length in **c-1** was fairly reproduced at different level of theory. As expected for such bulky structure, results was very dependent on the model for dispersion forces, with D3-B3LYP/6-311g(d,p) with PCM model for acetonitrile affording the best fit with the experimental crystallographic data.

**Table S4:** Computed C–O bond lengths (pm) for optimized structures of **c-1**

|                                   |                    |                 | C1 – O1      | C3–O1        |
|-----------------------------------|--------------------|-----------------|--------------|--------------|
| B3LYP                             | 6-31g(d)           |                 | 151.4        | 140.0        |
| B3LYP                             | 6-311g(d,p)        |                 | 151.7        | 139.8        |
| B3LYP                             | 6-311g(d,p)        | PCM(ACN)        | 151.5        | 139.9        |
| <b>D3-B3LYP</b>                   | <b>6-311g(d,p)</b> | <b>PCM(ACN)</b> | <b>150.6</b> | <b>139.5</b> |
| wb97xd                            | 6-311g(d,p)        | PCM(ACN)        | 147.8        | 138.6        |
| B97D3                             | 6-311g(d,p)        | PCM(ACN)        | 153.3        | 139.6        |
| M06                               | 6-311g(d,p)        | PCM(ACN)        | 148.1        | 138.6        |
| M06-2X                            | 6-311g(d,p)        | PCM(ACN)        | 147.6        | 139.2        |
| <b>Experimental XRD structure</b> |                    |                 | <b>150.7</b> | <b>139.1</b> |

**xyz coordinates of optimized structures of c-1**  
(E = -2249.718306)

|   | x           | y           | z           |   | x           | y           | z           |
|---|-------------|-------------|-------------|---|-------------|-------------|-------------|
| O | -0.15023100 | -1.36519600 | 0.13927900  | C | -0.69605600 | -2.28018100 | 4.21809800  |
| N | -2.53697000 | -1.00434500 | -0.15021900 | H | -1.15706100 | -3.25983400 | 4.06093900  |
| N | 3.32547600  | -0.13584400 | -0.41029800 | H | -1.33353600 | -1.71588400 | 4.90289800  |
| C | -2.86431900 | -2.44971000 | 0.07443600  | H | 0.26171900  | -2.44252400 | 4.72102800  |
| C | -2.26346100 | -2.70013000 | 1.48935400  | C | -1.63055800 | 2.06117000  | 0.88613100  |
| H | -1.42941800 | -3.39996600 | 1.41045800  | C | -1.71314400 | 2.64094800  | 2.15885800  |
| H | -2.99728600 | -3.15370500 | 2.15405500  | H | -1.30688100 | 2.10914600  | 3.01005200  |
| C | -1.72469400 | -1.35175800 | 2.02144500  | C | -2.29670300 | 3.89391600  | 2.33935300  |
| C | -1.38113100 | -0.65607300 | 0.64013700  | H | -2.35133500 | 4.32309200  | 3.33376700  |
| C | -0.88949300 | 0.79105600  | 0.65905900  | C | -2.79653600 | 4.59812800  | 1.24437100  |
| C | 0.43627800  | 0.81112200  | 0.41678600  | H | -3.24905700 | 5.57360500  | 1.38312700  |
| H | 1.03851200  | 1.70374900  | 0.43701100  | C | -2.70323200 | 4.04116200  | -0.02998700 |
| C | 0.93808500  | -0.49302700 | 0.09549500  | H | -3.08307000 | 4.58138800  | -0.89006100 |
| C | 2.17392400  | -0.92647700 | -0.26989700 | C | -2.12609800 | 2.78569200  | -0.20759100 |
| C | 2.49661000  | -2.37790200 | -0.67393300 | H | -2.05923700 | 2.35902200  | -1.19982300 |
| C | 4.03295900  | -2.33782900 | -0.84421900 | C | 1.77215300  | -2.70990900 | -2.01123600 |
| H | 4.37865500  | -2.99382000 | -1.64339600 | H | 0.70617200  | -2.55990400 | -1.85241800 |
| H | 4.51772700  | -2.67064200 | 0.07437700  | H | 2.07220300  | -1.97851900 | -2.76194300 |
| C | 4.42987600  | -0.87314900 | -1.10334500 | C | 1.99145800  | -4.11568900 | -2.58248700 |
| C | -3.10286300 | -0.21561400 | -1.21535800 | H | 1.55399800  | -4.88952200 | -1.94794600 |
| C | -4.34245000 | 0.45730400  | -1.00274800 | H | 3.05133300  | -4.35056800 | -2.71514900 |
| C | -4.86569000 | 1.26833100  | -2.01337200 | H | 1.51498000  | -4.19185700 | -3.56410600 |
| H | -5.79930400 | 1.79076300  | -1.83951500 | C | 2.07703900  | -3.43270100 | 0.38561400  |
| C | -4.21370200 | 1.43772200  | -3.22547300 | H | 0.98615500  | -3.46906600 | 0.40882900  |
| H | -4.63264600 | 2.08133300  | -3.99145700 | H | 2.41868600  | -4.40843700 | 0.02710600  |
| C | -3.02202200 | 0.76605600  | -3.44389200 | C | 2.59913100  | -3.23214400 | 1.80901800  |
| H | -2.51403900 | 0.88498400  | -4.39402000 | H | 2.18196800  | -3.99494100 | 2.47250300  |
| C | -2.45665500 | -0.06616900 | -2.46922600 | H | 2.30974400  | -2.25923100 | 2.20036800  |
| C | -5.16549800 | 0.36399500  | 0.27880500  | H | 3.68778200  | -3.30902300 | 1.86985400  |
| H | -4.65912600 | -0.32900700 | 0.93940200  | C | 4.48482300  | -0.56803500 | -2.61362200 |
| C | -6.58410500 | -0.17833600 | 0.01239300  | H | 3.50775100  | -0.66195000 | -3.08574500 |
| H | -7.09370900 | -0.37314000 | 0.96104500  | H | 5.16930800  | -1.26560800 | -3.10415800 |
| H | -6.56928700 | -1.10570600 | -0.56143200 | H | 4.85350900  | 0.43937600  | -2.79386100 |
| H | -7.18607200 | 0.54718700  | -0.54171100 | C | 5.80349300  | -0.55349200 | -0.50547000 |
| C | -5.27005300 | 1.70752800  | 1.02314100  | H | 6.04441500  | 0.50733000  | -0.60437400 |
| H | -5.78059700 | 2.45992700  | 0.41547000  | H | 6.56655600  | -1.12464900 | -1.04005700 |
| H | -4.29206200 | 2.10271900  | 1.28826700  | H | 5.85471100  | -0.82466500 | 0.54776900  |
| H | -5.84683300 | 1.57424300  | 1.94370300  | C | 3.52492800  | 1.17017600  | 0.15855600  |
| C | -1.15051200 | -0.75411600 | -2.83322500 | C | 3.36243000  | 2.34471000  | -0.61618500 |
| H | -0.83817600 | -1.33829500 | -1.97628900 | C | 3.64435200  | 3.58573000  | -0.03184900 |
| C | -1.31241700 | -1.69937100 | -4.03761400 | H | 3.53428100  | 4.48628600  | -0.62460700 |
| H | -2.13101100 | -2.40751000 | -3.89306600 | C | 4.04427200  | 3.69231800  | 1.29150400  |
| H | -0.39218500 | -2.27129900 | -4.18911800 | H | 4.25314500  | 4.66453500  | 1.72422500  |
| H | -1.51264800 | -1.14230900 | -4.95773700 | C | 4.16193700  | 2.54197000  | 2.05964100  |
| C | -0.04339200 | 0.27312800  | -3.11323600 | H | 4.45654200  | 2.62503200  | 3.09926600  |
| H | -0.29671300 | 0.91779200  | -3.95969000 | C | 3.91326100  | 1.27822500  | 1.51797700  |
| H | 0.89702200  | -0.22937000 | -3.34669300 | C | 2.84593300  | 2.34957300  | -2.04886200 |
| H | 0.11988700  | 0.90103600  | -2.24157900 | H | 2.61141500  | 1.32171600  | -2.32178000 |
| C | -4.36624900 | -2.75344500 | 0.02592600  | C | 1.55340600  | 3.18206000  | -2.18038400 |
| H | -4.92084300 | -2.27400500 | 0.82837000  | H | 0.78176800  | 2.85702700  | -1.48210400 |
| H | -4.50999000 | -3.83206400 | 0.12330800  | H | 1.15019500  | 3.08947300  | -3.19213600 |
| H | -4.79599300 | -2.44407400 | -0.92911400 | H | 1.74707100  | 4.24173100  | -1.99392700 |
| C | -2.19400800 | -3.37695700 | -0.96028000 | C | 3.89587700  | 2.90141200  | -3.03363000 |
| H | -2.59513000 | -3.19458500 | -1.95883900 | H | 4.04958300  | 3.97253000  | -2.87376900 |
| H | -2.39850600 | -4.42055600 | -0.70179700 | H | 3.56041500  | 2.76278900  | -4.06545400 |
| H | -1.11710500 | -3.23183800 | -0.97701500 | H | 4.86491300  | 2.41298600  | -2.92035700 |
| C | -2.76599400 | -0.49167400 | 2.79959500  | C | 4.02446000  | 0.07284300  | 2.43826100  |
| H | -3.22727900 | 0.21829400  | 2.11946500  | H | 3.93486600  | -0.81999100 | 1.82347800  |
| H | -2.21577000 | 0.11763700  | 3.52173200  | C | 2.85868000  | 0.07135700  | 3.44273000  |
| C | -3.88274300 | -1.22437400 | 3.55146800  | H | 2.92215800  | 0.93372500  | 4.11324400  |
| H | -3.49889200 | -1.98864700 | 4.22995300  | H | 2.87486700  | -0.83453600 | 4.05560900  |
| H | -4.58415200 | -1.71327200 | 2.87215100  | H | 1.90286800  | 0.11546700  | 2.92143800  |
| H | -4.45628700 | -0.50787200 | 4.14677400  | C | 5.36990700  | -0.00000700 | 3.18125900  |
| C | -0.47358500 | -1.54668400 | 2.89189300  | H | 6.21717100  | 0.06051500  | 2.49473100  |
| H | -0.04566400 | -0.56090200 | 3.09676300  | H | 5.44128400  | -0.94420900 | 3.72887600  |
| H | 0.26399000  | -2.09192000 | 2.31034700  | H | 5.47240800  | 0.80980700  | 3.90876900  |

**xyz coordinates of optimized structures of c-1\*\***  
(E = -2249.570967)

|   | x           | y           | z           |   | x           | y           | z           |
|---|-------------|-------------|-------------|---|-------------|-------------|-------------|
| O | 0.22093400  | -1.84515800 | 0.03816600  | C | -0.84001600 | -2.40343900 | 4.17058300  |
| N | -2.69521600 | -1.03692600 | -0.12883200 | H | -1.37529300 | -3.35025600 | 4.05778000  |
| N | 3.36748300  | -0.08760500 | -0.34024500 | H | -1.38528200 | -1.78898500 | 4.88994500  |
| C | -3.21297500 | -2.45488500 | 0.16634600  | H | 0.13703900  | -2.62717400 | 4.60566700  |
| C | -2.61516500 | -2.72127300 | 1.56560900  | C | -1.49507400 | 1.95499500  | 0.76630300  |
| H | -1.84506700 | -3.48830400 | 1.48632800  | C | -1.51967900 | 2.56189100  | 2.02671400  |
| H | -3.37325700 | -3.09319500 | 2.24976700  | H | -1.20268900 | 2.00403400  | 2.89854300  |
| C | -1.94873700 | -1.41801700 | 2.05663500  | C | -1.92812300 | 3.88739100  | 2.16196400  |
| C | -1.79673200 | -0.64748400 | 0.74166200  | H | -1.94207600 | 4.34623600  | 3.14371100  |
| C | -0.94373600 | 0.57066700  | 0.59713000  | C | -2.30518600 | 4.62242500  | 1.03876200  |
| C | 0.37977300  | 0.45441400  | 0.34761600  | H | -2.62015900 | 5.65398700  | 1.14492000  |
| H | 0.96400400  | 1.36088900  | 0.32910600  | C | -2.27109200 | 4.02683500  | -0.22064800 |
| C | 0.99777100  | -0.83485500 | 0.05443500  | H | -2.55829500 | 4.59112800  | -1.10015000 |
| C | 2.38835900  | -1.01879900 | -0.25552000 | C | -1.87011700 | 2.70027800  | -0.35741400 |
| C | 2.92306500  | -2.41165000 | -0.60795300 | H | -1.84854900 | 2.24219800  | -1.33728500 |
| C | 4.44775400  | -2.16961700 | -0.65564700 | C | 2.34469500  | -2.84624000 | -1.98993600 |
| H | 4.93636700  | -2.76492300 | -1.42563400 | H | 1.25700300  | -2.82040100 | -1.91370800 |
| H | 4.89732500  | -2.44911100 | 0.29851200  | H | 2.62648700  | -2.10432500 | -2.73909700 |
| C | 4.66627900  | -0.66848600 | -0.89227600 | C | 2.78131200  | -4.22994400 | -2.48133900 |
| C | -3.14912600 | -0.24191200 | -1.27175500 | H | 2.39867400  | -5.02918900 | -1.84371000 |
| C | -4.29527400 | 0.57219200  | -1.08860500 | H | 3.86908700  | -4.32839500 | -2.52843200 |
| C | -4.70367000 | 1.37291900  | -2.15742300 | H | 2.39297400  | -4.39889100 | -3.48912800 |
| H | -5.56786000 | 2.01333500  | -2.03376900 | C | 2.58187200  | -3.50226300 | 0.44774400  |
| C | -4.02545900 | 1.37247900  | -3.36706800 | H | 1.54407900  | -3.80241900 | 0.30886000  |
| H | -4.36036400 | 2.00560300  | -4.18050300 | C | 3.20513400  | -4.36951700 | 0.20941800  |
| C | -2.91877800 | 0.55469200  | -3.52992300 | H | 2.80265800  | -3.12949800 | 1.91433700  |
| H | -2.39653300 | 0.55377000  | -4.47836400 | H | 2.53105200  | -3.97054800 | 2.55740000  |
| C | -2.45184900 | -0.26807900 | -2.49790700 | H | 2.18790400  | -2.27971200 | 2.21050100  |
| C | -5.12957400 | 0.64198300  | 0.18973600  | H | 3.84525000  | -2.88178800 | 2.13075500  |
| H | -4.72486900 | -0.06946000 | 0.90404300  | C | 4.81687200  | -0.34157300 | -2.38553700 |
| C | -6.59937500 | 0.25483800  | -0.07604400 | H | 3.92497200  | -0.59324200 | -2.95686500 |
| H | -7.13071400 | 0.14855000  | 0.87344300  | H | 5.65256900  | -0.92031700 | -2.78476900 |
| H | -6.68995400 | -0.68257400 | -0.62497500 | H | 5.04200200  | 0.71078400  | -2.53607700 |
| H | -7.10788300 | 1.03016600  | -0.65432700 | C | 5.89282500  | -0.14200700 | -0.14832700 |
| C | -5.08566700 | 2.02702700  | 0.85966900  | H | 5.98861000  | 0.94121800  | -0.24144800 |
| H | -5.47475300 | 2.80074500  | 0.19355700  | H | 6.78074000  | -0.59983200 | -0.58952200 |
| H | -4.07673600 | 2.31102200  | 1.14653800  | H | 5.87055100  | -0.40678900 | 0.90652800  |
| H | -5.70660900 | 2.01553300  | 1.75981600  | C | 3.33867000  | 1.27581600  | 0.16259600  |
| C | -1.21681900 | -1.11273600 | -2.78254600 | C | 3.09563500  | 2.37006100  | -0.69736100 |
| H | -0.95584900 | -1.66303500 | -1.88360000 | C | 3.17250400  | 3.65979500  | -0.15838300 |
| C | -1.46581300 | -2.12170600 | -3.92061800 | H | 2.99487200  | 4.51122300  | -0.80358500 |
| H | -2.36021500 | -2.72318500 | -3.75264200 | C | 3.45141600  | 3.87430400  | 1.18228300  |
| H | -0.61127900 | -2.79843900 | -4.00753000 | H | 3.49921500  | 4.88347000  | 1.57492400  |
| H | -1.58519300 | -1.61083900 | -4.87987500 | C | 3.65303200  | 2.78739400  | 2.02067400  |
| C | -0.01067700 | -0.22779600 | -3.13440700 | H | 3.84828700  | 2.95651400  | 3.07234600  |
| H | -0.19971900 | 0.37902600  | -4.02292500 | C | 3.60993900  | 1.47797700  | 1.53714200  |
| H | 0.86323500  | -0.84796800 | -3.33556300 | C | 2.67945500  | 2.24795000  | -2.15821900 |
| H | 0.23074700  | 0.44272300  | -2.31464300 | H | 2.60653400  | 1.18924700  | -2.40703200 |
| C | -4.73362300 | -2.56147500 | 0.12019800  | C | 1.29257900  | 2.88268700  | -2.38827300 |
| H | -5.22387700 | -2.00273500 | 0.91322000  | H | 0.54309900  | 2.48833700  | -1.70381600 |
| H | -4.99766000 | -3.61293600 | 0.24591500  | H | 0.95534900  | 2.68820300  | -3.40906100 |
| H | -5.12220800 | -2.23256700 | -0.84402900 | H | 1.32867500  | 3.96558000  | -2.24738400 |
| C | -2.61877300 | -3.41561800 | -0.86798700 | C | 3.69495700  | 2.91519100  | -3.10708000 |
| H | -3.01362100 | -3.21735000 | -1.86333600 | H | 3.66851600  | 4.00225400  | -2.99515000 |
| H | -2.90731100 | -4.43119100 | -0.58805000 | H | 3.44989800  | 2.68078600  | -4.14632200 |
| H | -1.53182800 | -3.35612800 | -0.88144400 | H | 4.71920200  | 2.59396000  | -2.91533000 |
| C | -2.87233600 | -0.47601200 | 2.93655600  | C | 3.79488000  | 0.34211000  | 2.53354200  |
| H | -3.30943300 | 0.31326600  | 2.32442100  | H | 3.88347800  | -0.59004200 | 1.97963800  |
| H | -2.21712400 | 0.04227100  | 3.63889300  | C | 2.55146900  | 0.23160900  | 3.43362100  |
| C | -4.00314700 | -1.15285600 | 3.71406900  | H | 2.44540900  | 1.12199100  | 4.05941000  |
| H | -3.64666800 | -1.98045800 | 4.32883500  | H | 2.62412300  | -0.64040100 | 4.08874100  |
| H | -4.78469000 | -1.53681700 | 3.05554600  | H | 1.64648600  | 0.13713800  | 2.83436300  |
| H | -4.46866000 | -0.41819500 | 4.37570400  | C | 5.06176300  | 0.49245100  | 3.39438600  |
| C | -0.64593800 | -1.70057800 | 2.82402200  | H | 5.95433400  | 0.64473800  | 2.78458800  |
| H | -0.12884600 | -0.75339700 | 2.98661300  | H | 5.20741700  | -0.40899700 | 3.99551400  |
| H | -0.00560900 | -2.31145100 | 2.19368200  | H | 4.98070100  | 1.33710500  | 4.08298700  |

Significant computed isotropic hyperfine coupling constants (B3LYP/EPR-II // PCM[ACN]):  
a(<sup>14</sup>N): 13 MHz (exp: 15.0 MHz)



**xyz coordinates of optimized structures of o-1<sup>+</sup>** (most stable conformer)  
(E = -2249.571635)

|   | x           | y           | z           |   | x           | y           | z           |
|---|-------------|-------------|-------------|---|-------------|-------------|-------------|
| O | 1.36724600  | 0.45703200  | -1.71813500 | C | -4.44175800 | 4.48378400  | 0.06472600  |
| N | -3.33618300 | -0.03901300 | 0.12063500  | H | -5.45843800 | 4.11062200  | -0.07464800 |
| N | 3.21522200  | -0.82872300 | 0.13787700  | H | -4.31790500 | 5.33979900  | -0.60361300 |
| C | -4.79366500 | 0.37988500  | 0.27009400  | H | -4.35541200 | 4.85358300  | 1.08922900  |
| C | -4.62656500 | 1.64092200  | 1.11260900  | C | -0.47341500 | 2.27321700  | -0.62064000 |
| H | -4.64622500 | 1.36320800  | 2.16630200  | C | 0.47720400  | 2.92549400  | 0.17014600  |
| H | -5.44954300 | 2.33233900  | 0.95290500  | H | 0.75323400  | 2.50813900  | 1.13027400  |
| C | -3.24878200 | 2.24814500  | 0.74894100  | C | 1.08047100  | 4.10114200  | -0.26988700 |
| C | -2.49107100 | 1.01720600  | 0.18659900  | H | 1.81626100  | 4.59054400  | 0.35702300  |
| C | -1.10774100 | 0.99276900  | -0.15645600 | C | 0.75530700  | 4.62947600  | -1.51750000 |
| C | -0.25666700 | -0.12629400 | -0.06513800 | H | 1.23000100  | 5.54048300  | -1.86384000 |
| H | -0.54065600 | -0.98179500 | 0.52861500  | C | -0.16650200 | 3.96684100  | -2.32835300 |
| C | 0.99991800  | -0.19390600 | -0.72203200 | H | -0.41090000 | 4.35995000  | -3.30878500 |
| C | 2.07420700  | -1.19700300 | -0.35923800 | C | -0.77408600 | 2.79768700  | -1.88161700 |
| C | 2.05706400  | -2.62871600 | -0.83748300 | H | -1.48426400 | 2.28099600  | -2.51540700 |
| C | 3.50806000  | -3.10223500 | -0.55870400 | C | 0.97618400  | -3.46037400 | -0.10221200 |
| C | 3.52762200  | -4.01723900 | 0.03091200  | H | -0.00106400 | -3.03472600 | -0.33298000 |
| H | 4.01549700  | -3.31763200 | -1.49807300 | H | 0.98335900  | -4.45427100 | -0.55372200 |
| C | 4.25442700  | -1.96556700 | 0.17721200  | C | 1.13686400  | -3.61583700 | 1.40823800  |
| C | -2.98725500 | -1.38845800 | -0.26806600 | H | 0.33338600  | -4.24334700 | 1.79656300  |
| C | -2.77967200 | -1.71491700 | -1.62569600 | H | 1.08344700  | -2.66157700 | 1.93468100  |
| C | -2.49177200 | -3.04846100 | -1.93830000 | H | 2.07893700  | -4.09894700 | 1.67319300  |
| H | -2.32570300 | -3.32419800 | -2.97264600 | C | 1.73674800  | -2.60042900 | -2.36674100 |
| C | -2.41287200 | -4.02417500 | -0.95488700 | H | 0.75694700  | -2.14108300 | -2.50768100 |
| H | -2.18837000 | -5.04982500 | -1.22406700 | H | 2.46014500  | -1.94126000 | -2.85480000 |
| C | -2.59550900 | -3.67803900 | 0.37804000  | C | 1.75004200  | -3.97151200 | -3.04713500 |
| H | -2.50481700 | -4.44069600 | 1.14163000  | H | 1.63808800  | -3.83916700 | -4.12586800 |
| C | -2.87836600 | -2.36222600 | 0.75215800  | H | 0.92766200  | -4.60414300 | -2.70838600 |
| C | -2.84006400 | -0.70527900 | -2.76681700 | H | 2.68584600  | -4.51007700 | -2.87670300 |
| H | -3.10245700 | 0.26568000  | -2.35132900 | C | 5.52706400  | -1.55834100 | -0.55782800 |
| C | -3.91317500 | -1.08877800 | -3.80496100 | H | 5.32956800  | -1.31153400 | -1.59935400 |
| H | -4.04242600 | -0.27789800 | -4.52679100 | H | 6.21347600  | -2.40718800 | -0.53554400 |
| H | -4.88094700 | -1.29276500 | -3.34409200 | H | 6.01613800  | -0.71677900 | -0.06726600 |
| H | -3.61715100 | -1.98315600 | -4.35959200 | C | 4.60053100  | -2.30703200 | 1.62615200  |
| C | -1.48033100 | -0.54181600 | -3.47059800 | H | 5.05599600  | -1.45343800 | 2.12803400  |
| H | -1.15133100 | -1.48523100 | -3.91489100 | H | 5.32783100  | -3.12071400 | 1.61857700  |
| H | -0.70651800 | -0.19218900 | -2.79050300 | H | 3.73307700  | -2.63510300 | 2.19481000  |
| H | -1.57125000 | 0.18946500  | -4.27906300 | C | 3.51245000  | 0.51926100  | 0.63897500  |
| C | -3.02162100 | -2.03630800 | 2.23715800  | C | 3.22102400  | 0.80949700  | 1.98964300  |
| H | -3.36944200 | -1.00839600 | 2.32485700  | C | 3.57323100  | 2.07157600  | 2.47721700  |
| C | -1.67357800 | -2.10953800 | 2.97290500  | H | 3.35487600  | 2.31713200  | 3.50887800  |
| H | -1.28394700 | -3.12889100 | 2.97573800  | C | 4.18540500  | 3.01442400  | 1.66667300  |
| H | -1.79804600 | -1.79213600 | 4.01172200  | H | 4.45549100  | 3.98474500  | 2.06703600  |
| H | -0.92503400 | -1.46237700 | 2.51806700  | C | 4.42745400  | 2.71845700  | 0.33424100  |
| C | -4.03766500 | -2.95422400 | 2.94278200  | H | 4.87225100  | 3.47357100  | -0.30105500 |
| H | -4.98642800 | -3.00532700 | 2.40749600  | C | 4.09042700  | 1.48068600  | -0.22236500 |
| H | -4.23230700 | -2.58578300 | 3.95358200  | C | 2.48897200  | -0.13013400 | 2.94085600  |
| H | -3.65043200 | -3.97235000 | 3.03336300  | H | 2.34092700  | -1.08606500 | 2.44354700  |
| C | -5.39786500 | 0.67841200  | -1.11239300 | C | 1.09597100  | 0.43068500  | 3.27505100  |
| H | -4.81103500 | 1.40040900  | -1.67780300 | H | 0.56338600  | -0.25058900 | 3.94239400  |
| H | -6.39953700 | 1.09052700  | -0.97501000 | H | 0.50094200  | 0.55955900  | 2.37164000  |
| H | -5.48991000 | -0.23465000 | -1.69818800 | H | 1.16831600  | 1.40040200  | 3.77333800  |
| C | -5.67302400 | -0.66604100 | 0.95257700  | C | 3.27397800  | -0.39807600 | 4.23752600  |
| H | -5.62997700 | -1.62658700 | 0.43640300  | H | 4.28924400  | -0.74385000 | 4.04025600  |
| H | -6.70578200 | -0.31370400 | 0.91738000  | H | 2.76121800  | -1.16308100 | 4.82641600  |
| H | -5.41178900 | -0.80904100 | 1.99781400  | H | 3.34036500  | 0.50274200  | 4.85267400  |
| C | -2.53265100 | 2.77321500  | 2.02753600  | C | 4.32587100  | 1.30713900  | -1.72107800 |
| H | -1.59436200 | 3.24151000  | 1.72569000  | H | 3.96341700  | 0.32356600  | -2.01656500 |
| H | -3.15517600 | 3.57166300  | 2.44179400  | C | 3.51776900  | 2.34665400  | -2.52609300 |
| C | -2.24847600 | 1.74235000  | 3.12404400  | H | 3.91762100  | 3.35349900  | -2.37711100 |
| H | -3.16031900 | 1.35442700  | 3.58350500  | H | 2.47057100  | 2.34519700  | -2.23950500 |
| H | -1.65379400 | 2.19796400  | 3.91922700  | H | 3.58999500  | 2.11594500  | -3.59321700 |
| H | -1.68246800 | 0.89310300  | 2.74105100  | C | 5.81516500  | 1.43762200  | -2.10107400 |
| C | -3.37589400 | 3.43041900  | -0.26482400 | H | 5.94483800  | 1.21099000  | -3.16294500 |
| H | -2.41054700 | 3.93001200  | -0.31699700 | H | 6.46260500  | 0.77281700  | -1.53131400 |
| H | -3.56473300 | 3.04271800  | -1.26756900 | H | 6.16601900  | 2.45987500  | -1.93809100 |

Significant computed isotropic hyperfine coupling constants (B3LYP/EPR-II // PCM[ACN]):

a(<sup>14</sup>N): 10 MHz (exp: 11.4 MHz)

a(<sup>1</sup>H): 6 MHz (exp: 10.1 MHz)

**xyz coordinates of optimized structures of o-1<sup>+</sup> (conformer 2)**  
(E = -2249.568653)

|   | x           | y           | z           |   | x           | y           | z           |
|---|-------------|-------------|-------------|---|-------------|-------------|-------------|
| O | 1.54088200  | 1.18659000  | 0.08177200  | H | 5.24572300  | 2.97115800  | -3.40964600 |
| N | 3.77697200  | -0.33560000 | -0.34408000 | H | 6.33103000  | 2.26053700  | -2.20692400 |
| N | -3.53500700 | -0.46793500 | 0.42692000  | C | 5.95851100  | -0.46521400 | -1.62590600 |
| C | 4.11339400  | 0.66572100  | 1.88179200  | H | 5.53826100  | 0.03576800  | -2.49601400 |
| C | 4.11250200  | 0.81836500  | 0.48187400  | H | 6.70583400  | -1.17946000 | -1.97766000 |
| C | -3.74192100 | -0.02695900 | -1.98156900 | H | 6.46227900  | 0.26650500  | -0.99349300 |
| C | 2.62713100  | -2.13711300 | -1.32427700 | C | 1.69858100  | -0.88199200 | -3.41338700 |
| C | -1.11699300 | -0.08419500 | 0.22989400  | H | 1.06040400  | -1.01754800 | -4.28888100 |
| C | 4.89702800  | -1.24206400 | -0.84940800 | H | 2.70228100  | -0.64093400 | -3.77250100 |
| C | -1.14994100 | 2.16140200  | -0.93658200 | H | 1.32391400  | -0.01433600 | -2.86503200 |
| H | -1.26528800 | 1.65722900  | -1.88810800 | C | 4.44764000  | -1.15682100 | 3.64758500  |
| C | -1.17064000 | 1.41614600  | 0.24399600  | H | 5.40544900  | -1.44726100 | 3.21257700  |
| C | 1.37025400  | -0.02721500 | -0.16899500 | H | 3.98515900  | -2.04869600 | 4.07902700  |
| C | 2.56915700  | -0.81411300 | -0.56750300 | H | 4.64630400  | -0.46082500 | 4.46633200  |
| C | -3.93171300 | 0.42926500  | -0.65307600 | C | -1.87018300 | -1.29445100 | -3.11632100 |
| C | 4.58228100  | 1.73767500  | 2.64849400  | H | -1.47709500 | -2.29032300 | -3.33652300 |
| H | 4.59595600  | 1.64921000  | 3.72801600  | H | -1.12578100 | -0.74985400 | -2.53629700 |
| C | -4.51768800 | 1.68862000  | -0.39868600 | H | -1.99970000 | -0.77368100 | -4.06823100 |
| C | -3.20580100 | -1.40272900 | -2.36032600 | C | 2.27619700  | -4.69916800 | -1.00734600 |
| H | -3.02722900 | -1.97334500 | -1.45160700 | H | 1.46864900  | -4.78608800 | -1.73613300 |
| C | -1.03393900 | 2.07395800  | 1.46963200  | H | 2.11288800  | -5.46046400 | -0.24095500 |
| H | -1.04282400 | 1.49914800  | 2.38857500  | H | 3.21508000  | -4.93592600 | -1.51305400 |
| C | 0.09989400  | -0.69643500 | -0.04638400 | C | -2.21460000 | -2.09607500 | 1.53139600  |
| H | 0.10948400  | -1.76207300 | -0.16861100 | C | -4.82358600 | 2.24104600  | 0.98521500  |
| C | 1.68354600  | -2.15084300 | -2.55472300 | H | -4.33506100 | 1.60499100  | 1.72156500  |
| H | 1.97412900  | -3.00511400 | -3.17168600 | C | -5.06221300 | -0.68580400 | 2.46801200  |
| H | 0.66341500  | -2.35129400 | -2.22603600 | H | -4.25822800 | -0.26741000 | 3.07122100  |
| C | -0.94628400 | 3.53703700  | -0.89541200 | H | -5.55396900 | -1.46213000 | 3.05798400  |
| H | -0.92390300 | 4.10461200  | -1.81887200 | H | -5.79568000 | 0.08884400  | 2.27742000  |
| C | -2.26495500 | -0.85640800 | 0.62087100  | C | -4.22037000 | -2.20191200 | -3.20104300 |
| C | 4.11199400  | -2.19567100 | -1.76185000 | H | -4.36398000 | -1.74828600 | -4.18470900 |
| H | 4.20950800  | -1.86694500 | -2.79654400 | H | -5.19653500 | -2.25947100 | -2.71615500 |
| H | 4.51172100  | -3.20656600 | -1.70815000 | H | -3.85285800 | -3.22022500 | -3.35397800 |
| C | 2.30487300  | -3.31546700 | -0.35123100 | C | -1.72715000 | -1.55654300 | 2.92062400  |
| H | 3.04286300  | -3.31510600 | 0.45332800  | H | -0.69733300 | -1.21549300 | 2.78423100  |
| H | 1.34527700  | -3.14427600 | 0.13140300  | H | -2.30134100 | -0.66681900 | 3.18697900  |
| C | 3.50870800  | -0.53688000 | 2.59964600  | C | -6.34760100 | 2.24555100  | 1.23176200  |
| H | 3.28523800  | -1.31114300 | 1.86659100  | H | -6.56560400 | 2.50901100  | 2.27045100  |
| C | 5.57280800  | -1.94386500 | 0.33684700  | H | -6.81258200 | 1.28247800  | 1.01507200  |
| H | 6.05605600  | -1.21597000 | 0.98946700  | H | -6.82850200 | 2.98759300  | 0.58859900  |
| H | 6.34116300  | -2.61437200 | -0.05180800 | C | -3.68275400 | -2.56135900 | 1.50960900  |
| H | 4.87690400  | -2.53630300 | 0.92761300  | H | -3.81100900 | -3.31308200 | 0.73009400  |
| C | 4.45641600  | 2.03392200  | -0.13997600 | H | -3.98575300 | -3.02032600 | 2.44832500  |
| C | -4.86530700 | 2.48650500  | -1.49259700 | C | -5.72581900 | -1.69474500 | 0.27045500  |
| H | -5.31022900 | 3.45690100  | -1.31403600 | H | -6.28194000 | -0.80841000 | -0.03790900 |
| C | -4.09269100 | 0.82581500  | -3.03144200 | H | -6.40351400 | -2.34668900 | 0.82526400  |
| H | -3.94076700 | 0.49594600  | -4.05176000 | H | -5.39693500 | -2.22698400 | -0.62062200 |
| C | 4.91763400  | 3.06875400  | 0.67613400  | C | -1.30140100 | -3.28540500 | 1.13424400  |
| H | 5.18705400  | 4.01659900  | 0.22624100  | H | -0.26415000 | -3.03853400 | 1.36908200  |
| C | 5.00448800  | 2.91936300  | 2.05530400  | H | -1.56102500 | -4.09160200 | 1.82551900  |
| H | 5.36956700  | 3.73528200  | 2.66862000  | C | 3.01690800  | 3.27695100  | -1.78721200 |
| C | -4.54700000 | -1.33990900 | 1.17347800  | H | 2.12752500  | 2.88073700  | -1.30011900 |
| C | 4.21219300  | 2.31506300  | -1.61852500 | H | 2.80544200  | 3.42209300  | -2.85110000 |
| H | 3.93303800  | 1.37944500  | -2.10419300 | H | 3.24504400  | 4.25558300  | -1.35418100 |
| C | -0.80418100 | 3.44690600  | 1.51045200  | C | -4.28063100 | 3.66532700  | 1.19307900  |
| H | -0.66973900 | 3.94198700  | 2.46550700  | H | -4.82707200 | 4.39640600  | 0.59159100  |
| C | -0.74758300 | 4.18077600  | 0.32647100  | H | -3.22823900 | 3.72907400  | 0.93480700  |
| H | -0.56582700 | 5.24909000  | 0.35596000  | H | -4.39661900 | 3.95225200  | 2.24201500  |
| C | -4.64392900 | 2.07568900  | -2.79724500 | C | -1.41184000 | -3.83621300 | -0.28952400 |
| H | -4.90942600 | 2.72091000  | -3.62672000 | H | -1.14531300 | -3.10003600 | -1.04868600 |
| C | 2.16641200  | -0.13545700 | 3.24747400  | H | -2.42005100 | -4.18604400 | -0.51881800 |
| H | 2.32821700  | 0.57736300  | 4.06094400  | H | -0.74000300 | -4.68862900 | -0.40807100 |
| H | 1.67105700  | -1.01692300 | 3.66451200  | C | -1.78057400 | -2.54913100 | 4.08449100  |
| H | 1.49957300  | 0.32925700  | 2.52030000  | H | -2.79524700 | -2.90638600 | 4.27430200  |
| C | 5.44703400  | 2.88581600  | -2.33832300 | H | -1.43219400 | -2.05566900 | 4.99514700  |
| H | 5.68841500  | 3.88667100  | -1.97066700 | H | -1.13994600 | -3.41670800 | 3.91598100  |

**xyz coordinates of optimized structures of o-1<sup>+</sup> (conformer 3)**  
(E = -2249.564979)

|   | x           | y           | z           |   | x           | y           | z           |
|---|-------------|-------------|-------------|---|-------------|-------------|-------------|
| O | 1.33085600  | 0.56512400  | -1.59769100 | C | -1.58067800 | -3.32365900 | 3.57640800  |
| N | -3.43915200 | -0.54453500 | 0.43430700  | H | -2.60322700 | -3.65971400 | 3.76374900  |
| N | 3.74106000  | -0.21841000 | -0.14640100 | H | -1.14794100 | -3.04131900 | 4.53947100  |
| C | -4.41849200 | -1.47957800 | 1.13005700  | H | -1.00943900 | -4.17311000 | 3.19633100  |
| C | -3.59355800 | -2.76568000 | 1.18234800  | C | -0.98079000 | 1.27361400  | -0.06198400 |
| H | -3.79841000 | -3.35300900 | 0.28506300  | C | -0.35544100 | 1.95389500  | 0.99365200  |
| H | -3.85952100 | -3.38604400 | 2.03636100  | H | -0.04544600 | 1.40055100  | 1.87082600  |
| C | -2.10507200 | -2.36417100 | 1.19106300  | C | -0.09663900 | 3.32053600  | 0.92134800  |
| C | -2.15048500 | -0.97800900 | 0.49115700  | H | 0.40771900  | 3.81310900  | 1.74383100  |
| C | -1.01908900 | -0.23103800 | 0.07862000  | C | -0.47484100 | 4.04010300  | -0.20881400 |
| C | 0.24652200  | -0.84986500 | -0.00655500 | H | -0.27165200 | 5.10279200  | -0.27507700 |
| H | 0.40151300  | -1.81609700 | 0.43911300  | C | -1.10903000 | 3.37785400  | -1.25864600 |
| C | 1.34832200  | -0.31977600 | -0.72308700 | H | -1.40122300 | 3.92369000  | -2.14863900 |
| C | 2.73581000  | -0.91460500 | -0.58221500 | C | -1.34955600 | 2.00895500  | -1.19083400 |
| C | 3.14471700  | -2.22745600 | -1.20830800 | H | -1.80386300 | 1.51619800  | -2.03534000 |
| C | 4.67196900  | -2.27184400 | -0.94767700 | C | 2.40776500  | -3.43703700 | -0.57703400 |
| H | 4.91869200  | -3.05291900 | -0.23059300 | H | 1.36299800  | -3.41172300 | -0.89222100 |
| H | 5.21762000  | -2.49952300 | -1.86180100 | H | 2.83725500  | -4.33332800 | -1.02971800 |
| C | 5.10244900  | -0.89517700 | -0.39783600 | C | 2.49955600  | -3.56556400 | 0.94631000  |
| C | -3.93142600 | 0.45893900  | -0.49176200 | H | 1.98278600  | -4.46910200 | 1.27567500  |
| C | -4.42436800 | 1.69489700  | -0.02687100 | H | 2.04182400  | -2.72132100 | 1.46662600  |
| C | -4.93272900 | 2.59917500  | -0.96438700 | H | 3.53267300  | -3.64133000 | 1.29248700  |
| H | -5.31043900 | 3.55554800  | -0.62396600 | C | 2.80410200  | -2.12355400 | -2.73020400 |
| C | -4.95076700 | 2.30669700  | -2.31947800 | H | 1.73881100  | -1.90325300 | -2.83603100 |
| H | -5.34056900 | 3.02784400  | -3.02883700 | H | 3.33916900  | -1.26234200 | -3.14095200 |
| C | -4.46950300 | 1.08214400  | -2.76156200 | C | 3.14387900  | -3.37402400 | -3.54524100 |
| H | -4.48665500 | 0.85648200  | -3.82091000 | H | 2.97963700  | -3.17015200 | -4.60572000 |
| C | -3.96428000 | 0.13315500  | -1.87014100 | H | 2.51359900  | -4.22188500 | -3.27122700 |
| C | -4.42626100 | 2.11264200  | 1.43552300  | H | 4.18768700  | -3.67404700 | -3.42458200 |
| H | -3.92673900 | 1.33296000  | 2.00832700  | C | 5.89433900  | -0.09160700 | -1.42766700 |
| C | -5.86730300 | 2.27953100  | 1.95822400  | H | 5.34657900  | 0.03502500  | -2.36121700 |
| H | -5.86435100 | 2.43276800  | 3.04093400  | H | 6.81484300  | -0.63633400 | -1.64546000 |
| H | -6.49351800 | 1.41323700  | 1.73558100  | H | 6.16777800  | 0.88389400  | -1.03239500 |
| H | -6.34202300 | 3.15042700  | 1.49796400  | C | 5.91115300  | -1.00208700 | 0.89248700  |
| C | -3.63904900 | 3.41313300  | 1.66926400  | H | 6.09932000  | -0.01940300 | 1.32730900  |
| H | -4.11793400 | 4.26473800  | 1.17868800  | H | 6.87427700  | -1.45390300 | 0.64871100  |
| H | -2.62353000 | 3.33102100  | 1.29207500  | H | 5.42388800  | -1.63585800 | 1.63105100  |
| C | -3.59458300 | 3.63054000  | 2.74058700  | C | 3.61404500  | 1.06464400  | 0.55594200  |
| C | -3.45900800 | -1.18460700 | -2.44515900 | C | 3.43273300  | 1.01461200  | 1.95639300  |
| H | -3.25477100 | -1.85821800 | -1.61748700 | C | 3.35153700  | 2.22535100  | 2.64885300  |
| C | -2.14461100 | -0.99367300 | -3.22664000 | H | 3.20234800  | 2.21140100  | 3.72121500  |
| H | -2.28893700 | -0.29849800 | -4.05833000 | C | 3.45012100  | 3.44032900  | 1.98833500  |
| H | -1.81170300 | -1.94846200 | -3.64179400 | H | 3.38909900  | 4.36898900  | 2.54383200  |
| H | -1.34588000 | -0.60502900 | -2.59301700 | C | 3.60527900  | 3.46265400  | 0.61108200  |
| C | -4.50573000 | -1.87318300 | -3.34097500 | H | 3.65067900  | 4.41684100  | 0.10173100  |
| H | -5.47379300 | -1.95994600 | -2.84311600 | C | 3.67865900  | 2.28864600  | -0.14676200 |
| H | -4.16381500 | -2.87837100 | -3.60200100 | C | 3.27245300  | -0.27319100 | 2.75766900  |
| H | -4.65857600 | -1.32492300 | -4.27394800 | H | 3.45205100  | -1.11999900 | 2.09889400  |
| C | -4.78604500 | -1.00049700 | 2.54733100  | C | 1.83285600  | -0.40823200 | 3.28245900  |
| H | -3.91396800 | -0.69511400 | 3.12260900  | H | 1.70639600  | -1.36034000 | 3.80478000  |
| H | -5.26438100 | -1.82927000 | 3.07394600  | H | 1.11634100  | -0.36728900 | 2.46263600  |
| H | -5.49326700 | -0.17701000 | 2.52654700  | H | 1.59097000  | 0.39667400  | 3.98111900  |
| C | -5.70162600 | -1.65915300 | 0.31880700  | C | 4.27483100  | -0.37329200 | 3.92170600  |
| H | -6.25703900 | -0.72463700 | 0.22617100  | H | 5.30340700  | -0.22886100 | 3.58818300  |
| H | -6.33620100 | -2.38197300 | 0.83621900  | H | 4.20063800  | -1.35905800 | 4.38833400  |
| H | -5.49609100 | -2.04319500 | -0.67899400 | H | 4.06411700  | 0.37281000  | 4.69160200  |
| C | -1.30364900 | -3.52629600 | 0.53026300  | C | 3.77383000  | 2.44401900  | -1.66213600 |
| H | -0.26080000 | -3.48825200 | 0.84601900  | H | 3.75004200  | 1.45347200  | -2.11237100 |
| H | -1.69328400 | -4.44234100 | 0.98428200  | C | 2.56432100  | 3.22132500  | -2.22148700 |
| C | -1.37299300 | -3.67548800 | -0.98851900 | H | 2.58931800  | 4.26759400  | -1.90474300 |
| H | -2.39581500 | -3.82288300 | -1.34102000 | H | 1.62413600  | 2.78395300  | -1.89899700 |
| H | -0.79897200 | -4.55199400 | -1.29922600 | H | 2.59877200  | 3.20698500  | -3.31505000 |
| H | -0.96055700 | -2.80644700 | -1.50173700 | C | 5.06611500  | 3.16947100  | -2.09004300 |
| C | -1.53172400 | -2.12503300 | 2.62464800  | H | 5.15171800  | 3.16107900  | -3.18003500 |
| H | -0.49382500 | -1.80921100 | 2.51459000  | H | 5.96743200  | 2.71808300  | -1.67662700 |
| H | -2.04438000 | -1.27973600 | 3.08642800  | H | 5.04505500  | 4.21400600  | -1.76810200 |

**xyz coordinates of optimized structures of o-1<sup>+</sup> (conformer 4)**  
(E = -2249.570309)

|   | x           | y           | z           |   | x           | y           | z           |
|---|-------------|-------------|-------------|---|-------------|-------------|-------------|
| O | -1.59196400 | 1.16023400  | 0.61451600  | C | 4.48013500  | 3.45216500  | 2.68308300  |
| N | 3.35565800  | -0.17961300 | 0.41236600  | H | 5.23426700  | 2.74491200  | 3.03343700  |
| N | -3.30710200 | -0.75518900 | -0.29341200 | H | 4.10194800  | 3.98561900  | 3.55871600  |
| C | 4.79239900  | 0.01747700  | 0.89815300  | H | 4.97449000  | 4.18380000  | 2.03929800  |
| C | 5.00805400  | 1.46775600  | 0.49053200  | C | 0.68235300  | 2.48232700  | -0.14752400 |
| H | 5.37914400  | 1.48689200  | -0.53427400 | C | 0.46722700  | 2.93976300  | -1.45011900 |
| H | 5.75514800  | 1.96076000  | 1.10673600  | H | 0.70034500  | 2.29658000  | -2.28957600 |
| C | 3.63053600  | 2.16029900  | 0.55390400  | C | -0.02518700 | 4.22271800  | -1.68494500 |
| C | 2.66622100  | 0.96921600  | 0.27685100  | H | -0.17064800 | 4.56371400  | -2.70342100 |
| C | 1.25233800  | 1.09802900  | 0.03528900  | C | -0.33933300 | 5.05419100  | -0.61423500 |
| C | 0.35410200  | 0.03642700  | -0.11919100 | H | -0.72237200 | 6.05256600  | -0.79184500 |
| H | 0.73451900  | -0.95463700 | -0.29330400 | C | -0.18285900 | 4.58405500  | 0.69120300  |
| C | -1.07849900 | 0.18232300  | 0.02656600  | H | -0.45890800 | 5.21092700  | 1.53153700  |
| C | -2.01049100 | -0.85627300 | -0.50396700 | C | 0.31517100  | 3.30616400  | 0.92012100  |
| C | -1.68344100 | -2.09716600 | -1.32994900 | H | 0.39843300  | 2.93318100  | 1.93188500  |
| C | -3.08096400 | -2.54390500 | -1.82201900 | C | -0.75934500 | -1.80139700 | -2.53932900 |
| H | -3.24205900 | -2.19293600 | -2.84134700 | H | 0.27480300  | -1.74305500 | -2.20115100 |
| H | -3.18467000 | -3.62605900 | -1.83838100 | H | -0.80679800 | -2.67424400 | -3.19628200 |
| C | -4.11975700 | -1.90466800 | -0.89668100 | C | -1.11627800 | -0.54758400 | -3.34345600 |
| C | 2.95563500  | -1.50396500 | -0.00965800 | H | -0.45628100 | -0.45407900 | -4.20758800 |
| C | 2.51594000  | -2.45203000 | 0.93634100  | H | -1.00909900 | 0.36205200  | -2.74742900 |
| C | 2.30308200  | -3.76118100 | 0.49262700  | H | -2.14172100 | -0.57844300 | -3.71929500 |
| H | 1.96758500  | -4.51113800 | 1.19835800  | C | -1.04130600 | -3.15462400 | -0.38092200 |
| C | 2.48974700  | -4.11373700 | -0.83613800 | H | -0.08555000 | -2.77288200 | -0.02648700 |
| H | 2.31562000  | -5.13388800 | -1.15571200 | H | -1.66594500 | -3.26686400 | 0.50860200  |
| C | 2.87597700  | -3.15255900 | -1.76095200 | C | -0.81207200 | -4.53194300 | -1.00779100 |
| H | 2.99513900  | -3.43431900 | -2.79953300 | H | -0.33041700 | -5.18526800 | -0.27744000 |
| C | 3.13216500  | -1.83522100 | -1.37403500 | H | -0.15732700 | -4.47694700 | -1.87825600 |
| C | 2.21448200  | -2.11583000 | 2.39206500  | H | -1.74590900 | -5.00975300 | -1.30977800 |
| H | 2.52282600  | -1.08841100 | 2.57599800  | C | -4.59340700 | -2.84327200 | 0.21968100  |
| C | 2.97773700  | -3.03619300 | 3.36336000  | H | -3.76876800 | -3.24856700 | 0.80348100  |
| H | 2.88360500  | -2.66200000 | 4.38585500  | H | -5.12636900 | -3.67814100 | -0.23870500 |
| H | 4.03935100  | -3.10346300 | 3.11794100  | H | -5.28233800 | -2.32874400 | 0.88870000  |
| H | 2.57091700  | -4.05052300 | 3.34327000  | C | -5.33809300 | -1.40634600 | -1.67336300 |
| C | 0.70533200  | -2.18741700 | 2.69173400  | H | -6.04271900 | -0.87699500 | -1.03128900 |
| H | 0.30718700  | -3.18502500 | 2.49053500  | H | -5.84619600 | -2.28019200 | -2.08657100 |
| H | 0.14119000  | -1.46729600 | 2.09956100  | H | -5.05289000 | -0.76298600 | -2.50299300 |
| H | 0.52992300  | -1.96054800 | 3.74610900  | C | -4.02024500 | 0.24158000  | 0.50014500  |
| C | 3.58592100  | -0.82833000 | -2.42807600 | C | -4.60042400 | 1.33768100  | -0.16540400 |
| H | 3.98239100  | 0.04605200  | -1.91441100 | C | -5.42553900 | 2.18393400  | 0.57913600  |
| C | 2.40756200  | -0.34983100 | -3.29336900 | H | -5.88125100 | 3.03867300  | 0.09478100  |
| H | 1.97336500  | -1.18416200 | -3.84983800 | C | -5.65509500 | 1.96258700  | 1.93131000  |
| H | 2.74899500  | 0.39703900  | -4.01468600 | H | -6.30778000 | 2.62527300  | 2.48803500  |
| H | 1.62121900  | 0.10017700  | -2.68757700 | C | -5.01473600 | 0.91273300  | 2.57571500  |
| C | 4.70621200  | -1.37514600 | -3.33168200 | H | -5.15258400 | 0.78089300  | 3.64206000  |
| H | 5.52974800  | -1.79749700 | -2.75276500 | C | -4.17001500 | 0.03856800  | 1.88457400  |
| H | 5.10244400  | -0.56754500 | -3.95236400 | C | -4.26135300 | 1.71309200  | -1.60336000 |
| H | 4.33648700  | -2.15369100 | -4.00334000 | H | -3.74383300 | 0.87510700  | -2.07095400 |
| C | 4.90693100  | -0.18435600 | 2.41777500  | C | -3.27971400 | 2.90110300  | -1.61124900 |
| H | 4.17041600  | 0.38879000  | 2.97719800  | H | -2.97044400 | 3.12904700  | -2.63531900 |
| H | 5.90056900  | 0.14492200  | 2.72911900  | H | -2.39055200 | 2.68239400  | -1.02285900 |
| H | 4.81221400  | -1.23388600 | 2.68476300  | H | -3.75384100 | 3.79491500  | -1.19467700 |
| C | 5.77605300  | -0.93041100 | 0.21221600  | C | -5.50039900 | 2.03673400  | -2.45542800 |
| H | 5.56218900  | -1.97515400 | 0.44266300  | H | -6.24090400 | 1.23552300  | -2.42388000 |
| H | 6.77599300  | -0.69972800 | 0.58569100  | H | -5.20481700 | 2.18928800  | -3.49689700 |
| H | 5.78701400  | -0.80010300 | -0.86704400 | H | -5.98538000 | 2.95528300  | -2.11568700 |
| C | 3.61084300  | 3.32003000  | -0.48173100 | C | -3.35385100 | -0.97145900 | 2.68371600  |
| H | 2.70820200  | 3.91265000  | -0.34875300 | H | -2.81577500 | -1.61780600 | 1.99017500  |
| H | 4.44549400  | 3.97374600  | -0.20819100 | C | -2.29584000 | -0.22715700 | 3.52539300  |
| C | 3.74994300  | 2.93259500  | -1.95615000 | H | -2.77994000 | 0.41194100  | 4.26906400  |
| H | 4.72566400  | 2.50100600  | -2.18899500 | H | -1.66358600 | 0.39902800  | 2.89549000  |
| H | 3.62969100  | 3.81865100  | -2.58375900 | H | -1.66500200 | -0.94463900 | 4.05532000  |
| H | 2.98680400  | 2.21505200  | -2.25798300 | C | -4.20849800 | -1.87140200 | 3.59270900  |
| C | 3.31404400  | 2.75947200  | 1.96994600  | H | -3.57267200 | -2.61691100 | 4.07767200  |
| H | 2.51767100  | 3.48787400  | 1.83627500  | H | -4.98584000 | -2.39857500 | 3.03793800  |
| H | 2.90124100  | 1.98758800  | 2.62375200  | H | -4.69365600 | -1.29076800 | 4.38128800  |

**xyz coordinates of optimized structures of <sup>1</sup>o-1 (most stable conformer)**  
(E = -2249.715027)

|   | x           | y           | z           |   | x           | y           | z           |
|---|-------------|-------------|-------------|---|-------------|-------------|-------------|
| O | -1.55190000 | 1.09637700  | 0.76399800  | C | 4.40227400  | 3.39125500  | 2.84247300  |
| N | 3.31023100  | -0.24481500 | 0.51214100  | H | 5.14404100  | 2.67826700  | 3.20885500  |
| N | -3.28612500 | -0.71102100 | -0.30605800 | H | 3.99932000  | 3.91725500  | 3.71250600  |
| C | 4.70041900  | -0.06555000 | 1.06365900  | H | 4.92192200  | 4.12849500  | 2.22473100  |
| C | 4.97216700  | 1.38288700  | 0.66375900  | C | 0.71138600  | 2.48110600  | -0.19139900 |
| H | 5.37835900  | 1.38433600  | -0.34879900 | C | 0.55585900  | 2.93281700  | -1.50612100 |
| H | 5.71384900  | 1.85990900  | 1.30177100  | H | 0.82261000  | 2.27585200  | -2.32459900 |
| C | 3.61323500  | 2.11338500  | 0.67153600  | C | 0.08738400  | 4.21704000  | -1.78264000 |
| C | 2.62167200  | 0.95704700  | 0.33604800  | H | -0.00310900 | 4.54768200  | -2.81184600 |
| C | 1.27697200  | 1.09945600  | 0.03540400  | C | -0.26843000 | 5.06756100  | -0.73948700 |
| C | 0.32616500  | 0.03826200  | -0.24008300 | H | -0.63204400 | 6.06813000  | -0.94690500 |
| H | 0.68292900  | -0.88544500 | -0.65904600 | C | -0.17807500 | 4.60927900  | 0.57640800  |
| C | -1.04722100 | 0.16960100  | 0.04314100  | H | -0.48707000 | 5.24911400  | 1.39637600  |
| C | -1.97674300 | -0.80593800 | -0.54925600 | C | 0.29266100  | 3.32677400  | 0.84141500  |
| C | -1.70068300 | -2.01290700 | -1.45610800 | H | 0.32837000  | 2.96494400  | 1.85950400  |
| C | -3.11898700 | -2.40272900 | -1.93614700 | C | -0.81306600 | -1.71271300 | -2.69356200 |
| H | -3.29874500 | -1.98249400 | -2.92659200 | H | 0.23706700  | -1.72568000 | -2.40415900 |
| H | -3.24404900 | -3.48042300 | -2.02301000 | H | -0.94236300 | -2.55091700 | -3.38619100 |
| C | -4.12258900 | -1.80332600 | -0.94824000 | C | -1.12792300 | -0.40638400 | -3.42681600 |
| C | 2.93654400  | -1.52249300 | -0.02541100 | H | -0.50251500 | -0.31296800 | -4.31782500 |
| C | 2.46227000  | -2.53972900 | 0.83173600  | H | -0.93631000 | 0.45694200  | -2.78739000 |
| C | 2.25097200  | -3.81694700 | 0.30317600  | H | -2.17125900 | -0.35941300 | -3.75117200 |
| H | 1.89041200  | -4.60679600 | 0.95182800  | C | -1.05999900 | -3.13041800 | -0.58116900 |
| C | 2.45935400  | -4.08443100 | -1.04237700 | H | -0.09524800 | -2.77290100 | -0.22787300 |
| H | 2.27907600  | -5.07838400 | -1.43463200 | H | -1.66908600 | -3.27528500 | 0.31512800  |
| C | 2.87288600  | -3.06407600 | -1.88891600 | C | -0.86271500 | -4.48020200 | -1.27539700 |
| H | 3.01095700  | -3.27232500 | -2.94340600 | H | -0.38320800 | -5.17819400 | -0.58522300 |
| C | 3.13317100  | -1.77935000 | -1.40433500 | H | -0.21530600 | -4.39424900 | -2.14950900 |
| C | 2.12298500  | -2.28934400 | 2.29435300  | H | -1.80818800 | -4.92706800 | -1.59119300 |
| H | 2.42491800  | -1.27084900 | 2.53064000  | C | -4.58974000 | -2.81308200 | 0.10945600  |
| C | 2.86549100  | -3.25470200 | 3.23615800  | H | -3.75740800 | -3.25814200 | 0.65247300  |
| H | 2.72642700  | -2.94998200 | 4.27724100  | H | -5.13778200 | -3.61440700 | -0.39053600 |
| H | 3.93759500  | -3.28534800 | 3.02893800  | H | -5.26157400 | -2.33840500 | 0.82419900  |
| H | 2.48199900  | -4.27414300 | 3.13612700  | C | -5.35391000 | -1.25589700 | -1.67519800 |
| C | 0.60623800  | -2.37548800 | 2.54306000  | H | -6.04271000 | -0.75557900 | -0.99343400 |
| H | 0.21900100  | -3.36812800 | 2.29600100  | H | -5.87854100 | -2.09898300 | -2.13089700 |
| H | 0.06474400  | -1.64020700 | 1.94681700  | H | -5.07623200 | -0.56617900 | -2.46998400 |
| H | 0.39323500  | -2.18487100 | 3.59833100  | C | -3.97423900 | 0.24990600  | 0.54411000  |
| C | 3.61413600  | -0.71211800 | -2.38030100 | C | -4.55392600 | 1.38192900  | -0.06057700 |
| H | 3.95637900  | 0.13868400  | -1.79524300 | C | -5.39556900 | 2.18298300  | 0.71507600  |
| C | 2.46522200  | -0.22005200 | -3.27734300 | H | -5.84460400 | 3.06460800  | 0.27321400  |
| H | 2.08019600  | -1.03477900 | -3.89718500 | H | -5.65124500 | 1.88221400  | 2.04796100  |
| H | 2.81565600  | 0.57374800  | -3.94336400 | C | -6.31737300 | 2.50865900  | 2.63095900  |
| H | 1.64204800  | 0.17170500  | -2.68113400 | C | -5.01833700 | 0.79562400  | 2.63895700  |
| C | 4.79318700  | -1.18374400 | -3.25030300 | H | -5.17316800 | 0.60081000  | 3.69380400  |
| H | 5.60409500  | -1.60039600 | -2.64894600 | C | -4.15862500 | -0.03296500 | 1.91126800  |
| H | 5.19104800  | -0.34085500 | -3.82237200 | C | -4.18067900 | 1.83537100  | -1.46594900 |
| H | 4.48352500  | -1.94946400 | -3.96666300 | H | -3.67790200 | 1.00849400  | -1.96862200 |
| C | 4.76862700  | -0.25791200 | 2.59225400  | C | -3.16047800 | 2.98614800  | -1.37814700 |
| H | 4.00132700  | 0.30900000  | 3.11644400  | H | -2.82039700 | 3.27266100  | -2.37760600 |
| H | 5.74502000  | 0.07876700  | 2.95109400  | H | -2.29658800 | 2.68906000  | -0.78436000 |
| H | 4.66534700  | -1.30716600 | 2.86206200  | H | -3.61606600 | 3.86629700  | -0.91269300 |
| C | 5.71560800  | -1.02018400 | 0.42682900  | C | -5.39089600 | 2.24645500  | -2.32034900 |
| H | 5.48497100  | -2.06361300 | 0.65098500  | H | -6.15504800 | 1.46691900  | -2.35080300 |
| H | 6.70482200  | -0.79646600 | 0.83382400  | H | -5.07029400 | 2.45254100  | -3.34554700 |
| H | 5.76170500  | -0.89943600 | -0.65362200 | H | -5.85783200 | 3.15756000  | -1.93655100 |
| C | 3.67712400  | 3.29939900  | -0.33179600 | C | -3.34287500 | -1.08031800 | 2.66045700  |
| H | 2.77412800  | 3.90087800  | -0.23614700 | H | -2.79730200 | -1.67984300 | 1.93132200  |
| H | 4.50372800  | 3.93809300  | 0.00022500  | C | -2.28944600 | -0.37112600 | 3.53688500  |
| C | 3.88656000  | 2.95698700  | -1.80809000 | H | -2.77789200 | 0.23869700  | 4.30339100  |
| H | 4.85387800  | 2.48600600  | -1.99889300 | H | -1.66486500 | 0.27279300  | 2.91714800  |
| H | 3.84488000  | 3.86828600  | -2.41096600 | H | -1.66054900 | -1.10851200 | 4.04233900  |
| C | 3.10855100  | 2.28635800  | -2.16954300 | C | -4.19215900 | -2.03077900 | 3.52099100  |
| H | 3.26232100  | 2.70440800  | 2.08086300  | H | -3.55216400 | -2.79481500 | 3.97156600  |
| H | 2.46532600  | 3.43079200  | 1.93127500  | H | -4.96460700 | -2.53682000 | 2.93974100  |
| H | 2.83068200  | 1.92391100  | 2.71081100  | H | -4.68431600 | -1.49441400 | 4.33675200  |

xyz coordinates of optimized structures of <sup>1</sup>O-1 (conformer 2)  
(E = -2249.708697)

|   | x           | y           | z           |   | x           | y           | z           |
|---|-------------|-------------|-------------|---|-------------|-------------|-------------|
| O | 1.59135700  | 1.11341200  | 0.55259200  | H | 5.08827500  | 3.59052000  | -2.89290300 |
| N | 3.81488200  | -0.22121500 | -0.38010700 | H | 6.26275000  | 2.74177100  | -1.87652300 |
| N | -3.50667200 | -0.47198000 | 0.58562600  | C | 5.97789600  | -0.11139300 | -1.69797200 |
| C | 4.28964400  | 0.37335100  | 1.96699300  | H | 5.54926300  | 0.53877900  | -2.45836200 |
| C | 4.18433900  | 0.76800500  | 0.61905200  | H | 6.72067300  | -0.75033300 | -2.18094900 |
| C | -3.98008800 | 0.00345200  | -1.79346200 | H | 6.48924900  | 0.49921200  | -0.95260400 |
| C | 2.64246200  | -1.81525300 | -1.65673400 | C | 1.68613800  | -0.19638600 | -3.46592300 |
| C | -1.10872200 | -0.09266900 | 0.13777000  | H | 1.05394200  | -0.16816500 | -4.35711100 |
| C | 4.91867100  | -1.01226100 | -1.05939200 | H | 2.68462700  | 0.13709800  | -3.76163000 |
| C | -1.08249400 | 2.01481400  | -1.25759000 | H | 1.28956400  | 0.52622000  | -2.75048800 |
| H | -1.00181000 | 1.40335100  | -2.14707400 | C | 4.68799400  | -1.72524700 | 3.38279400  |
| C | -1.22125600 | 1.39438700  | -0.01181200 | H | 5.62544800  | -1.93895800 | 2.86579000  |
| C | 1.41144800  | 0.00696100  | -0.05787200 | H | 4.23699300  | -2.67781500 | 3.67518700  |
| C | 2.58440600  | -0.66087500 | -0.64797900 | H | 4.92636100  | -1.18085900 | 4.30040600  |
| C | -4.05607100 | 0.39814500  | -0.43183100 | C | -2.16243100 | -1.17669800 | -3.11192700 |
| C | 4.82246500  | 1.29336600  | 2.87591200  | H | -1.80177600 | -2.15169800 | -3.45189500 |
| H | 4.90915200  | 1.01693100  | 3.92020600  | H | -1.36701900 | -0.69906700 | -2.54128400 |
| C | -4.69507400 | 1.61888700  | -0.09679200 | H | -2.36035900 | -0.57024200 | -3.99999300 |
| C | -3.43111400 | -1.33962500 | -2.25782200 | C | 2.29734300  | -4.39540900 | -1.84984500 |
| H | -3.16563300 | -1.91550500 | -1.37636100 | H | 1.46646700  | -4.34537800 | -2.55619100 |
| C | -1.31790500 | 2.20267900  | 1.12429200  | H | 2.16204700  | -5.29613300 | -1.24572300 |
| H | -1.41211800 | 1.73126300  | 2.09589700  | H | 3.21999800  | -4.51794200 | -2.42257100 |
| C | 0.17931800  | -0.65382300 | -0.19479200 | C | -2.01897400 | -2.19683500 | 1.34988000  |
| H | 0.18796800  | -1.64750000 | -0.59893500 | C | -4.92743500 | 2.09864000  | 1.33011000  |
| C | 1.70205000  | -1.61015700 | -2.87700100 | H | -4.27985600 | 1.51361300  | 1.98315300  |
| H | 2.02047700  | -2.31708300 | -3.64969700 | C | -4.69821700 | -0.91677300 | 2.79604600  |
| H | 0.68491400  | -1.89252300 | -2.60490800 | H | -3.81211000 | -0.53049000 | 3.29697100  |
| C | -1.02575800 | 3.40238700  | -1.36585000 | H | -5.08437000 | -1.75094300 | 3.38791500  |
| H | -0.91706400 | 3.86303900  | -2.34213300 | H | -5.45619500 | -0.14024600 | 2.79877900  |
| C | -2.16429600 | -0.86873200 | 0.57151900  | C | -4.48714900 | -2.15144500 | -3.03292100 |
| C | 4.11992400  | -1.77596200 | -2.12292200 | H | -4.71875900 | -1.68985800 | -3.99659700 |
| H | 4.19471000  | -1.24673300 | -3.07361400 | H | -5.42148300 | -2.23958500 | -2.47432500 |
| H | 4.52645700  | -2.77434700 | -2.28033200 | H | -4.11061200 | -3.15961600 | -3.22943900 |
| C | 2.33826600  | -3.16556300 | -0.93737200 | C | -1.38029800 | -1.79788600 | 2.72276500  |
| H | 3.08903900  | -3.32034600 | -0.15904000 | H | -0.37220700 | -1.43982500 | 2.49929600  |
| H | 1.38697500  | -3.08975500 | -0.41676800 | H | -1.91218300 | -0.93601100 | 3.12868600  |
| C | 3.71118700  | -0.93408300 | 2.49782000  | C | -6.40316600 | 1.88832100  | 1.73554700  |
| H | 3.44607200  | -1.56714100 | 1.65154400  | H | -6.55178300 | 2.14070000  | 2.78991300  |
| C | 5.61622400  | -1.93551100 | -0.04904700 | H | -6.74569900 | 0.86584100  | 1.57900000  |
| H | 6.10890900  | -1.35102800 | 0.72853300  | H | -7.04763400 | 2.54134500  | 1.13973300  |
| H | 6.37721300  | -2.51739800 | -0.57294100 | C | -3.47918500 | -2.66874400 | 1.45387300  |
| H | 4.92588900  | -2.63062800 | 0.42506400  | H | -3.70629500 | -3.31556600 | 0.60421200  |
| C | 4.51256500  | 2.07162000  | 0.19972700  | H | -3.67055800 | -3.25037900 | 2.35540200  |
| C | -5.19109600 | 2.42726800  | -1.12581300 | C | -5.68000400 | -1.74102300 | 0.63801000  |
| H | -5.68065900 | 3.35963700  | -0.87250500 | H | -6.29472100 | -0.85313400 | 0.48906300  |
| C | -4.46787800 | 0.86306200  | -2.78079000 | H | -6.25517400 | -2.45802000 | 1.22898500  |
| H | -4.39424800 | 0.56801400  | -3.82116500 | H | -5.48180500 | -2.18467800 | -0.33756000 |
| C | 5.03582400  | 2.95161400  | 1.14951600  | C | -1.15659000 | -3.34841700 | 0.76622100  |
| H | 5.28711600  | 3.96341300  | 0.85380200  | H | -0.10246300 | -3.11173400 | 0.92267000  |
| C | 5.21363200  | 2.56385900  | 2.47303400  | H | -1.35388300 | -4.21944700 | 1.39956700  |
| H | 5.62838000  | 3.26008200  | 3.19363300  | C | 2.93025300  | 3.49203700  | -1.13084100 |
| C | -4.37542200 | -1.42212000 | 1.37343400  | H | 2.09967900  | -2.94462300 | -0.68583800 |
| C | 4.18068300  | 2.59219700  | -1.19391100 | H | 2.65142200  | 3.82020500  | -2.13752000 |
| H | 3.91989800  | 1.73853700  | -1.82022200 | H | 3.12924500  | 4.38453600  | -0.52862300 |
| C | -1.22760100 | 3.58808300  | 1.02631500  | C | -4.58594600 | 3.58570400  | 1.54236000  |
| H | -1.27067300 | 4.19565000  | 1.92395100  | H | -5.33133400 | 4.23840100  | 1.07956600  |
| C | -1.08346900 | 4.19655900  | -0.22115000 | H | -3.61220800 | 3.83528200  | 1.13045000  |
| H | -1.01655900 | 5.27619900  | -0.29892000 | H | -4.57723300 | 3.81234700  | 2.61263200  |
| C | -5.06568900 | 2.07269200  | -2.45996200 | C | -1.37763700 | -3.76779200 | -0.68712900 |
| H | -5.44344600 | 2.72432100  | -3.24011800 | H | -1.13894700 | -2.96772600 | -1.38600800 |
| C | 2.40144500  | -0.64516800 | 3.26087800  | H | -2.40821500 | -4.07573600 | -0.87804800 |
| H | 2.60498300  | -0.07045600 | 4.16986500  | H | -0.73574800 | -4.61900700 | -0.92877000 |
| H | 1.91963500  | -1.58253900 | 3.55490900  | C | -1.30667500 | -2.88774800 | 3.79626700  |
| H | 1.71824800  | -0.07131100 | 2.63392000  | H | -2.29536700 | -3.27058200 | 4.06303800  |
| C | 5.34833400  | 3.33789800  | -1.86093600 | H | -0.85982200 | -2.47760700 | 4.70632400  |
| H | 5.56924300  | 4.27490500  | -1.34240900 | H | -0.69082200 | -3.73405800 | 3.48418200  |

**xyz coordinates of optimized structures of <sup>1</sup>o-1 (conformer 3)**  
(E = -2249.706454)

|   | x           | y           | z           |   | x           | y           | z           |
|---|-------------|-------------|-------------|---|-------------|-------------|-------------|
| O | 1.31792400  | 0.52784600  | -1.78519000 | C | -5.10902800 | 3.81891500  | -0.75428700 |
| N | -3.25822600 | -0.14048800 | 0.39349400  | H | -5.99737300 | 3.18430800  | -0.71313400 |
| N | 3.19459800  | -0.79457700 | 0.00209400  | H | -5.19494200 | 4.43932300  | -1.65107400 |
| C | -4.70832000 | 0.17071300  | 0.63792300  | H | -5.13425100 | 4.48728900  | 0.11068800  |
| C | -4.59856200 | 1.58620700  | 1.19364100  | C | -0.46930200 | 2.37560700  | -0.39380100 |
| H | -4.40165700 | 1.51279800  | 2.26434600  | C | 0.47993300  | 2.91963300  | 0.48267600  |
| H | -5.52678600 | 2.14360300  | 1.07861900  | H | 0.73475100  | 2.38245200  | 1.38623800  |
| C | -3.39281500 | 2.25387300  | 0.49941200  | C | 1.10300400  | 4.13389700  | 0.21305800  |
| C | -2.48018100 | 1.03341800  | 0.20523300  | H | 1.83072800  | 4.52815900  | 0.91348200  |
| C | -1.14110500 | 1.06979000  | -0.07838300 | C | 0.80892300  | 4.82902100  | -0.96034900 |
| C | -0.20609900 | -0.06244700 | -0.00634800 | H | 1.29661600  | 5.77368300  | -1.17581100 |
| H | -0.37744300 | -0.84504500 | 0.71782500  | C | -0.08904300 | 4.27528400  | -1.87122900 |
| C | 0.93865000  | -0.13508900 | -0.75402800 | H | -0.29867200 | 4.78432700  | -2.80658800 |
| C | 2.04080400  | -1.12626300 | -0.51834800 | C | -0.70968100 | 3.05837000  | -1.59184900 |
| C | 2.05631800  | -2.51298100 | -1.12792100 | H | -1.37967700 | 2.61485600  | -2.31719400 |
| C | 3.53684800  | -2.94551000 | -0.97685300 | C | 1.03498900  | -3.43305300 | -0.40719800 |
| H | 3.63747500  | -3.94155100 | -0.54902600 | H | 0.06638500  | -2.93120000 | -0.42340200 |
| H | 4.01341900  | -2.97100200 | -1.95672000 | H | 0.91929100  | -4.32915800 | -1.01974700 |
| C | 4.25376000  | -1.89468000 | -0.09795800 | C | 1.36880400  | -3.87793200 | 1.01497700  |
| C | -2.90462400 | -1.44067100 | -0.11252800 | H | 0.57637200  | -4.53061700 | 1.38495900  |
| C | -2.80057000 | -1.68572100 | -1.50519400 | H | 1.44384500  | -3.03921100 | 1.70816400  |
| C | -2.52636300 | -2.98730100 | -1.93976400 | H | 2.30169900  | -4.44318900 | 1.06126600  |
| H | -2.43765100 | -3.18135900 | -3.00272200 | C | 1.64195700  | -2.38270400 | -2.62541500 |
| C | -2.37210500 | -4.03701700 | -1.04493600 | H | 0.62186200  | -1.99808300 | -2.66042100 |
| H | -2.16959700 | -5.03909800 | -1.40695200 | C | 2.27030500  | -1.61581500 | -3.08341200 |
| C | -2.44626300 | -3.78572900 | 0.31834000  | H | 1.73214200  | -3.67781900 | -3.43786500 |
| H | -2.28708300 | -4.59871500 | 1.01758900  | H | 1.51893900  | -3.46258400 | -4.48820300 |
| C | -2.69004100 | -2.49914900 | 0.80851000  | H | 1.00926700  | -4.42639600 | -3.10709300 |
| C | -2.96126400 | -0.60311400 | -2.56801500 | H | 2.72760600  | -4.12790600 | -3.39137800 |
| H | -3.23463400 | 0.31938500  | -2.06379700 | C | 5.52985400  | -1.39387000 | -0.76976300 |
| C | -4.06750600 | -0.94164100 | -3.58607100 | H | 5.33896600  | -1.04471600 | -1.78268600 |
| H | -4.24036000 | -0.08612200 | -4.24616500 | H | 6.23420600  | -2.22690100 | -0.82528300 |
| H | -5.01270000 | -1.19145800 | -3.10254400 | H | 5.99623200  | -0.59559700 | -0.19200100 |
| H | -3.78016100 | -1.78856800 | -4.21595000 | C | 4.60556500  | -2.40188500 | 1.30174600  |
| C | -1.64341200 | -0.33022000 | -3.31455700 | H | 5.07795600  | -1.61227800 | 1.88708000  |
| H | -1.31698400 | -1.21837800 | -3.86530500 | H | 5.31884700  | -3.22285000 | 1.20502600  |
| H | -0.84529900 | -0.02944300 | -2.63908100 | H | 3.73608300  | -2.76907100 | 1.84080800  |
| H | -1.79277400 | 0.47219300  | -4.04498000 | C | 3.48460200  | 0.48697900  | 0.64491200  |
| C | -2.64665200 | -2.29021000 | 2.32131600  | C | 3.19558000  | 0.64750000  | 2.01826000  |
| H | -2.91511300 | -1.25238500 | 2.51252800  | C | 3.59528900  | 1.83630000  | 2.63780700  |
| C | -1.22945100 | -2.50162800 | 2.87998800  | H | 3.38634500  | 1.97775600  | 3.69103100  |
| H | -0.91595600 | -3.54119200 | 2.76874300  | C | 4.23839300  | 2.84090200  | 1.93192200  |
| H | -1.20623100 | -2.25638600 | 3.94592800  | H | 4.54407600  | 3.75162100  | 2.43460800  |
| H | -0.49825700 | -1.87276000 | 2.37598000  | C | 4.45597700  | 2.68736100  | 0.57167800  |
| C | -3.61376100 | -3.21381800 | 3.08693300  | H | 4.91024600  | 3.49711200  | 0.01447600  |
| H | -4.63181900 | -3.16624000 | 2.70223900  | C | 4.07722000  | 1.52641300  | -0.10955300 |
| H | -3.63690700 | -2.93707900 | 4.14522300  | C | 2.41955800  | -0.35405700 | 2.86818500  |
| H | -3.28505200 | -4.25539800 | 3.02868500  | H | 2.18064200  | -1.21972100 | 2.25215000  |
| C | -5.56407500 | 0.10097100  | -0.64323400 | C | 1.08400200  | 0.25602500  | 3.33642100  |
| H | -5.21313000 | 0.76902600  | -1.42503500 | H | 0.54522700  | -0.45795500 | 3.96273400  |
| H | -6.59575100 | 0.37308100  | -0.40583300 | H | 0.45345300  | 0.50918500  | 2.48489500  |
| H | -5.56728800 | -0.91670700 | -1.03688200 | H | 1.25005700  | 1.15892200  | 3.92951700  |
| C | -5.37868500 | -0.75402400 | 1.65819600  | C | 3.21882500  | -0.84174900 | 4.09117000  |
| H | -5.40376500 | -1.78438200 | 1.30083500  | H | 4.19566500  | -1.24026300 | 3.81729700  |
| H | -6.41169400 | -0.42665900 | 1.80186500  | H | 2.66259000  | -1.62919200 | 4.60737600  |
| H | -4.88150800 | -0.72479700 | 2.62630200  | H | 3.37794600  | -0.02829200 | 4.80391000  |
| C | -2.77312600 | 3.30138700  | 1.46822000  | C | 4.26427000  | 1.51925000  | -1.62515300 |
| H | -2.01965800 | 3.87889700  | 0.93171900  | H | 3.90190000  | 0.56771200  | -2.01145800 |
| H | -3.56957300 | 4.00752200  | 1.73140700  | C | 3.39934500  | 2.61833200  | -2.27512200 |
| C | -2.14613500 | 2.75514600  | 2.75466100  | H | 3.75249200  | 3.61418600  | -1.99230300 |
| H | -2.88341100 | 2.29117700  | 3.41499200  | H | 2.35850900  | 2.51277800  | -1.98170800 |
| H | -1.67000000 | 3.56421700  | 3.31589100  | H | 3.46791600  | 2.53763800  | -3.36520100 |
| H | -1.38459000 | 2.00848000  | 2.52718000  | C | 5.73406300  | 1.72312200  | -2.04485300 |
| C | -3.81135700 | 3.00324900  | -0.81127400 | H | 5.82842400  | 1.60214500  | -3.12795400 |
| H | -2.99585000 | 3.67797100  | -1.06864700 | H | 6.41727600  | 1.02261300  | -1.56560900 |
| H | -3.87508700 | 2.29595300  | -1.64042700 | H | 6.07218900  | 2.73372700  | -1.79946800 |

**xyz coordinates of optimized structures of <sup>3</sup>o-1 (most stable conformer )**  
(E = -2249.697218)

|   | x           | y           | z           |   | x           | y           | z           |
|---|-------------|-------------|-------------|---|-------------|-------------|-------------|
| O | -1.58042700 | 1.10881500  | 0.80635600  | C | 4.42469200  | 3.36247600  | 2.88933000  |
| N | 3.33513400  | -0.26186100 | 0.53637500  | H | 5.15424800  | 2.63897900  | 3.25925300  |
| N | -3.37566400 | -0.68442400 | -0.34933200 | H | 4.01852500  | 3.88825200  | 3.75801400  |
| C | 4.72249500  | -0.08030000 | 1.10170400  | H | 4.95930200  | 4.09717800  | 2.28139900  |
| C | 5.00118800  | 1.36775400  | 0.69933900  | C | 0.72510900  | 2.46972800  | -0.14338500 |
| H | 5.41078100  | 1.36673500  | -0.31190800 | C | 0.58521900  | 2.93483200  | -1.45387700 |
| H | 5.74254000  | 1.84211500  | 1.33961300  | H | 0.86852700  | 2.29361300  | -2.27825800 |
| C | 3.64446100  | 2.10295500  | 0.70096200  | C | 0.10375600  | 4.21705600  | -1.71764600 |
| C | 2.66237500  | 0.94929800  | 0.35564200  | H | 0.01694700  | 5.55837100  | -2.74340500 |
| C | 1.27558200  | 1.08452000  | 0.09315800  | C | -0.26909400 | 5.05105600  | -0.66725200 |
| C | 0.35890000  | 0.02808100  | -0.01483200 | H | -0.64342800 | 6.04912500  | -0.86633200 |
| H | 0.73173200  | -0.97938200 | -0.06800700 | C | -0.18069900 | 4.58099400  | 0.64412500  |
| C | -1.11209400 | 0.18539400  | 0.08562400  | H | -0.49864000 | 5.20958500  | 1.46896900  |
| C | -2.01508800 | -0.73263200 | -0.56321700 | C | 0.30138100  | 3.30060200  | 0.89871300  |
| C | -1.68743200 | -1.87379300 | -1.52171800 | H | 0.33715100  | 2.93002600  | 1.91382600  |
| C | -3.07938400 | -2.21629700 | -2.10609200 | C | -0.71566200 | -1.47443900 | -2.66151600 |
| H | -3.22372600 | -1.67454900 | -3.04188000 | H | 0.30369100  | -1.46332000 | -2.27399800 |
| H | -3.19097700 | -3.27573400 | -2.33274900 | H | -0.74425900 | -2.26998700 | -3.41327700 |
| C | -4.13469600 | -1.74590300 | -1.09528600 | C | -1.01431000 | -0.13313900 | -3.33689400 |
| C | 2.98205000  | -1.53022600 | -0.04599200 | H | -0.31587800 | 0.04228300  | -4.15891400 |
| C | 2.50381600  | -2.57770100 | 0.77353700  | H | -0.91706000 | 0.69431800  | -2.63173800 |
| C | 2.27335300  | -3.82954400 | 0.19490300  | H | -2.02532500 | -0.09689500 | -3.75179700 |
| H | 1.90607600  | -4.64001200 | 0.81363900  | C | -1.09460500 | -3.06795500 | -0.71417700 |
| C | 2.47261500  | -4.04612900 | -1.16103100 | H | -0.13649200 | -2.75610200 | -0.30063900 |
| H | 2.27364400  | -5.01995200 | -1.59255200 | H | -1.73711100 | -3.26724200 | 0.14689200  |
| C | 2.90629500  | -1.36987600 | -1.96485800 | C | -0.88205400 | -4.37087000 | -1.49055100 |
| H | 3.04466800  | -3.17011700 | -3.02626300 | H | -0.42350400 | -5.11792100 | -0.83771900 |
| C | 3.18473000  | -1.73960200 | -1.43104100 | H | -0.21166200 | -4.23129600 | -2.34047500 |
| C | 2.18188200  | -2.39140500 | 2.24995000  | H | -1.82077300 | -4.78974700 | -1.86086200 |
| H | 2.44579000  | -1.36987600 | 2.51842300  | C | -4.59799200 | -2.87241600 | -0.15545300 |
| C | 2.99047700  | -3.35945200 | 3.13378100  | H | -3.76902400 | -3.33476600 | 0.37759000  |
| H | 2.86095100  | -3.10838700 | 4.19030400  | H | -5.09784500 | -3.64623000 | -0.74300400 |
| H | 4.05746100  | -3.32861500 | 2.90199700  | H | -5.31113900 | -2.48966600 | 0.57572600  |
| H | 2.65424400  | -4.39072100 | 2.99362200  | C | -5.37287100 | -1.19203600 | -1.81100500 |
| C | 0.67738000  | -2.55594600 | 2.53636300  | H | -6.08536600 | -0.75882500 | -1.10657200 |
| H | 0.32375400  | -3.55341200 | 2.26076000  | H | -5.86986600 | -2.01249500 | -2.33442000 |
| H | 0.08205500  | -1.82268800 | 1.99238300  | H | -5.10503500 | -0.43739000 | -2.54849800 |
| H | 0.48781300  | -2.41633300 | 3.60422900  | C | -4.08125200 | 0.19614700  | 0.54653600  |
| C | 3.69128800  | -0.64933500 | -2.36659200 | C | -4.63597600 | 1.38707900  | 0.03270600  |
| H | 4.03845200  | 0.17894100  | -1.75352900 | C | -5.44317000 | 2.15982400  | 0.87159000  |
| C | 2.55504000  | -0.11747900 | -3.25505800 | H | -5.87561500 | 3.07982200  | 0.49522400  |
| H | 2.15609700  | -0.91064200 | -3.89363700 | C | -5.68303600 | 1.78294800  | 2.18822800  |
| H | 2.91716000  | 0.68710100  | -3.90129800 | H | -6.32022400 | 2.39024200  | 2.82200700  |
| H | 1.73841700  | 0.26768000  | -2.64599200 | C | -5.07198300 | 0.64430100  | 2.69829500  |
| C | 4.87390800  | -1.10932200 | -3.23769400 | H | -5.21601400 | 0.38569100  | 3.74121800  |
| H | 5.67535000  | -1.54874900 | -2.63960800 | C | -4.25031000 | -0.15870400 | 1.90034100  |
| H | 5.28472800  | -0.25512000 | -3.78316200 | C | -4.28312200 | 1.91573300  | -1.35195300 |
| H | 4.56445800  | -1.85298200 | -3.97680700 | H | -3.77223100 | 1.11970500  | -1.89415300 |
| C | 4.76386800  | -0.26421400 | 2.63214300  | C | -3.28508200 | 3.08334400  | -1.23048700 |
| H | 3.97789500  | 0.29355400  | 3.13761800  | H | -2.98668200 | 3.43333200  | -2.22319300 |
| H | 5.72795000  | 0.08870700  | 3.00775200  | H | -2.38979700 | 2.78056200  | -0.68915700 |
| H | 4.67089200  | -1.31287700 | 2.90674600  | H | -3.73933700 | 3.26348000  | -0.69970900 |
| C | 5.74310600  | -1.04050000 | 0.48375000  | C | -5.51321000 | 2.34337900  | -2.16988300 |
| H | 5.51150900  | -2.08180600 | 0.71662500  | H | -6.25897500 | 1.54815900  | -2.23056600 |
| H | 6.72790400  | -0.81147300 | 0.89825500  | H | -5.21230000 | 2.60887400  | -3.18756700 |
| H | 5.79969500  | -0.93173600 | -0.59748800 | H | -5.99637500 | 3.22197500  | -1.73324100 |
| C | 3.71426400  | 3.30032100  | -0.28965100 | C | -3.46448900 | -1.28652800 | 2.55832400  |
| H | 2.80686800  | 3.89591700  | -0.19482900 | H | -2.94546200 | -1.83846800 | 1.77551000  |
| H | 4.53310600  | 3.93962600  | 0.05956000  | C | -2.38338100 | -0.69310900 | 3.48462000  |
| C | 3.93887600  | 2.98189100  | -1.76818000 | H | -2.84225600 | -0.13926600 | 4.30957500  |
| H | 4.90236200  | 2.50207300  | -1.95577800 | H | -1.73554500 | -0.01333500 | 2.93063200  |
| H | 3.91638300  | 3.90462100  | -2.35447900 | H | -1.77262300 | -1.49231400 | 3.91274900  |
| C | 3.15740200  | 2.32874600  | -2.15214500 | C | -4.34528400 | -2.27594300 | 3.33906200  |
| H | 3.28543000  | 2.69277200  | 2.11163400  | H | -3.73352600 | -3.09589600 | 3.72647700  |
| H | 2.49933700  | 3.43022100  | 1.95652200  | H | -5.13010800 | -2.70566200 | 2.71431800  |
| H | 2.83699000  | 1.91515900  | 2.73335300  | H | -4.82512800 | -1.79231700 | 4.19443100  |



xyz coordinates of optimized structures of <sup>3</sup>O-1 (conformer 2)  
(E = -2249.691776)

|   | x           | y           | z           |   | x           | y           | z           |
|---|-------------|-------------|-------------|---|-------------|-------------|-------------|
| O | 1.58679100  | 1.07722200  | 0.56535800  | H | 5.01607800  | 3.69211300  | -2.88051300 |
| N | 3.85842500  | -0.19089000 | -0.46698800 | H | 6.21433700  | 2.78918800  | -1.94277600 |
| N | -3.54900000 | -0.43890300 | 0.56294900  | C | 5.88553600  | -0.06228900 | -1.95969200 |
| C | 4.39240600  | 0.32233600  | 1.88993600  | H | 5.38150000  | 0.58992200  | -2.67199700 |
| C | 4.26159200  | 0.74694600  | 0.55033700  | H | 6.59272400  | -0.68533300 | -2.51277400 |
| C | -3.95973200 | -0.05450500 | -1.84418200 | H | 6.45381900  | 0.55154200  | -1.25821100 |
| C | 2.58689700  | -1.83215600 | -1.63178400 | C | 1.40373100  | -0.31743300 | -3.39320100 |
| C | -1.11145700 | -0.10081600 | 0.20081200  | H | 0.69753300  | -0.34429900 | -4.22716200 |
| C | 4.89359200  | -0.97203000 | -1.22546700 | H | 2.35862400  | -0.04996200 | -3.77941400 |
| C | -1.09138100 | 2.05543100  | -1.11598000 | H | 1.03780000  | 0.41189500  | -2.66818000 |
| H | -1.08464000 | 1.47700300  | -2.03135300 | C | 4.92459200  | -1.81994500 | 3.18544200  |
| C | -1.19671300 | 1.39346600  | 0.10947000  | H | 5.84623300  | -1.96711400 | 2.61937100  |
| C | 1.43843800  | -0.01593300 | -0.04133300 | H | 4.52619700  | -2.80439100 | 3.44791100  |
| C | 2.57658200  | -0.65506000 | -0.66288700 | H | 5.18035700  | -1.31030200 | 4.11842000  |
| C | -4.05017300 | 0.40170100  | -0.50371400 | C | -2.13891100 | -1.30339300 | -3.07291900 |
| C | 4.90550500  | 1.22780700  | 2.82470200  | H | -1.76226200 | -2.29349600 | -3.34429400 |
| H | 5.01510000  | 0.91938600  | 3.85822000  | H | -1.36086900 | -0.78357500 | -2.51529300 |
| C | -4.66271100 | 1.65137800  | -0.23334100 | H | -2.32156800 | -0.75333500 | -4.00003900 |
| C | -3.42455000 | -1.42398700 | -2.23866100 | C | 2.32283200  | -4.43792300 | -1.71990600 |
| H | -3.17987700 | -1.96428000 | -1.32912100 | H | 1.44746100  | -4.43848500 | -2.37276900 |
| C | -1.21857400 | 2.15099700  | 1.28375300  | H | 2.25637500  | -5.32186400 | -1.07983200 |
| H | -1.29537500 | 1.64121300  | 2.23748000  | H | 3.21034100  | -4.55237700 | -2.34791500 |
| C | 0.12821100  | -0.68952000 | -0.04591900 | C | -2.12506200 | -2.15752200 | 1.46819300  |
| H | 0.15693600  | -1.75785900 | -0.14630800 | C | -4.89181700 | 2.20883100  | 1.16463500  |
| C | 1.53498800  | -1.70766500 | -2.76513900 | H | -4.28415800 | 1.62669200  | 1.85667800  |
| H | 1.80076000  | -2.42985500 | -3.54367300 | C | -4.80262300 | -0.72650200 | 2.76393700  |
| H | 0.56040200  | -2.01797200 | -2.38681900 | H | -3.91793400 | -0.33011100 | 3.25960400  |
| C | -0.97661500 | 3.44312200  | -1.16708700 | H | -5.21761900 | -1.51709000 | 3.39450900  |
| H | -0.89249300 | 3.94213600  | -2.12646000 | H | -5.54468500 | 0.06306700  | 2.70613800  |
| C | -2.22297600 | -0.87159000 | 0.61920200  | C | -4.47450700 | -2.25733700 | -2.99768400 |
| C | 4.01886800  | -1.75447500 | -2.22071100 | H | -4.69337700 | -1.82868600 | -3.97936100 |
| H | 3.99708400  | -1.21983400 | -3.17161900 | H | -5.41546000 | -2.32387100 | -2.44717700 |
| H | 4.43666700  | -2.74133700 | -2.42086400 | H | -4.09938200 | -3.27289800 | -3.15486500 |
| C | 2.38541900  | -3.17247200 | -0.85728200 | H | -1.50878900 | -1.72357300 | 2.83962900  |
| H | 3.19188100  | -3.27681400 | -0.12801100 | H | -0.49232200 | -1.37801000 | 2.62971500  |
| H | 1.46727000  | -3.11118500 | -0.27251300 | H | -2.04577800 | -0.84928200 | 3.21066000  |
| C | 3.88115900  | -1.02775800 | 2.38066100  | C | -6.38129500 | 2.09427200  | 1.55548900  |
| H | 3.60717000  | -1.62284400 | 1.51162200  | H | -6.53021600 | 2.40190500  | 2.59499600  |
| C | 5.70126900  | -1.89242200 | -0.29323700 | H | -6.77288400 | 1.08367800  | 1.43944000  |
| H | 6.24501500  | -1.30235100 | 0.44654800  | H | -6.98385000 | 2.75098000  | 0.92117700  |
| H | 6.42973300  | -2.45251200 | -0.88413500 | C | -3.60330400 | -2.58307400 | 1.55188500  |
| H | 5.07156900  | -2.60843900 | 0.23158500  | H | -3.82131400 | -3.26806000 | 0.72965000  |
| C | 4.53520100  | 2.08114200  | 0.18249800  | H | -3.83620500 | -3.11195000 | 2.47597100  |
| C | -5.12425800 | 2.42292800  | -1.30529700 | C | -5.75977500 | -1.64079100 | 0.63137100  |
| H | -5.59254700 | 3.37829600  | -1.10276300 | H | -6.34560700 | -0.74417400 | 0.42676600  |
| C | -4.41468800 | 0.76941300  | -2.87705200 | H | -6.36733000 | -2.31224600 | 1.24291400  |
| H | -4.33299100 | 0.42524100  | -3.90151400 | H | -5.55280600 | -2.13648700 | -0.31693300 |
| C | 5.04897600  | 2.94613400  | 1.15207200  | C | -1.29311300 | -3.36910500 | 0.95467300  |
| H | 5.26578200  | 3.97456700  | 0.88646900  | H | -0.23495000 | -3.19003800 | 1.16066200  |
| C | 5.25538500  | 2.52197300  | 2.45969700  | H | -1.56811400 | -4.21456600 | 1.59401000  |
| H | 5.65853400  | 3.20653600  | 3.19811300  | C | 2.91982900  | 3.54944700  | -1.06476700 |
| C | -4.46420700 | -1.32108200 | 1.38058000  | H | 2.08690600  | 3.00814300  | -0.61775800 |
| C | 4.16000400  | 2.64074100  | -1.18465400 | H | 2.61772800  | 3.90566400  | -2.05504700 |
| H | 3.87478000  | 1.80064600  | -1.81752100 | H | 3.13814400  | 4.42575900  | -0.44585200 |
| C | -1.07022400 | 3.53389100  | 1.23944800  | C | -4.46968000 | 3.68313300  | 1.30574800  |
| H | -1.05771700 | 4.10492300  | 2.16143200  | H | -5.16340400 | 4.35048500  | 0.78704700  |
| C | -0.94356200 | 4.18606600  | 0.01222100  | H | -3.47187200 | 3.85175500  | 0.91074900  |
| H | -0.83012700 | 5.26389200  | -0.02398300 | H | -4.47368300 | 3.96817300  | 2.36201500  |
| C | -4.99085300 | 2.00423400  | -2.61994200 | C | -1.46153200 | -3.80392500 | -0.50134500 |
| H | -5.34431100 | 2.62717800  | -3.43410700 | H | -1.16894900 | -3.01891600 | -1.19712000 |
| C | 2.59579800  | -0.83303700 | 3.21161800  | H | -2.49164400 | -4.08475000 | -0.73294600 |
| H | 2.81319200  | -0.29628300 | 4.14015600  | H | -0.83369700 | -4.67584000 | -0.70306900 |
| H | 2.16276000  | -1.80293100 | 3.47529800  | C | -1.46356000 | -2.78429000 | 3.94361000  |
| H | 1.85532100  | -0.26120500 | 2.65204300  | H | -2.45797400 | -3.16988400 | 4.18388200  |
| C | 5.31075100  | 3.39699500  | -1.86914700 | H | -1.05388600 | -2.34679900 | 4.85837700  |
| H | 5.56543500  | 4.31037800  | -1.32399300 | H | -0.82950900 | -3.63227300 | 3.67610800  |

xyz coordinates of optimized structures of <sup>3</sup>O-1 (conformer 3)  
(E = -2249.689167)

|   | x           | y           | z           |   | x           | y           | z           |
|---|-------------|-------------|-------------|---|-------------|-------------|-------------|
| O | -1.57602400 | 0.98202000  | -0.64785700 | C | 2.18648500  | -3.24304400 | -3.72956300 |
| N | 3.61767700  | -0.40737700 | -0.38196400 | H | 3.22260600  | -3.58882300 | -3.77670400 |
| N | -3.84068800 | -0.35476500 | 0.27542400  | H | 1.89951500  | -2.93542500 | -4.73900700 |
| C | 4.69637100  | -1.30176300 | -0.94940200 | H | 1.55998700  | -4.09523300 | -3.45733900 |
| C | 3.94249600  | -2.63131000 | -1.10458300 | C | 1.16385000  | 1.30352600  | -0.52854600 |
| H | 4.07563000  | -3.21369100 | -0.19100300 | C | 1.13899300  | 1.86230900  | -1.81079300 |
| H | 4.33840700  | -3.23047500 | -1.92409500 | H | 1.21656200  | 1.20755600  | -2.67183400 |
| C | 2.44676100  | -2.30845800 | -1.27637600 | C | 0.93833200  | 3.22802300  | -1.98795700 |
| C | 2.33966400  | -0.93931100 | -0.57534200 | H | 0.88909700  | 3.64164300  | -2.98949800 |
| C | 1.13806000  | -0.19452800 | -0.40109900 | C | 0.80330300  | 4.06363100  | -0.87831400 |
| C | -0.08994900 | -0.82060400 | -0.20136400 | H | 0.64754300  | 5.12846500  | -1.01248200 |
| H | -0.07230100 | -1.87932700 | -0.02671200 | C | 0.89545800  | 3.52298300  | 0.40309600  |
| C | -1.42670200 | -0.19114700 | -0.21607600 | H | 0.80978900  | 4.16601800  | 1.27215700  |
| C | -2.58738400 | -0.92900400 | 0.24288500  | C | 1.06669800  | 2.15129000  | 0.57471100  |
| C | -2.65157700 | -2.33614300 | 0.83498800  | H | 1.09846700  | 1.73134900  | 1.57181100  |
| C | -4.17577700 | -2.59781400 | 0.92124100  | C | -2.02321300 | -3.45698700 | -0.03877800 |
| H | -4.48620100 | -3.20753800 | 0.07094500  | H | -0.96269900 | -3.55268500 | 0.18401100  |
| H | -4.44385500 | -3.15100200 | 1.82172400  | H | -2.46558000 | -4.40491100 | 0.28416400  |
| C | -4.90123400 | -1.24626300 | 0.85694700  | C | -2.21839900 | -3.29570100 | -1.54774800 |
| C | 3.90795200  | 0.56212000  | 0.65141900  | H | -1.81877000 | -4.16285300 | -2.08040800 |
| C | 4.50646800  | 1.80698900  | 0.33716800  | H | -1.70782500 | -2.40515300 | -1.92115100 |
| C | 4.76238900  | 2.71353300  | 1.37074000  | H | -3.27548500 | -3.20378200 | -1.81239800 |
| H | 5.21864300  | 3.66704300  | 1.13391100  | C | -1.98431600 | -2.30644700 | 2.24205600  |
| C | 4.43263600  | 2.43261900  | 2.68764400  | H | -0.96765300 | -1.92302100 | 2.12792100  |
| H | 4.62550200  | 3.15852600  | 3.46979800  | H | -2.51312500 | -1.57270700 | 2.85753800  |
| C | 3.86661500  | 1.20345900  | 2.99252300  | C | -1.92764900 | -3.64472900 | 2.98639000  |
| H | 3.63041800  | 0.96944500  | 4.02418600  | H | -1.48782900 | -3.50254400 | 3.97732500  |
| C | 3.61679800  | 0.24782600  | 2.00441700  | H | -1.31363000 | -4.37672200 | 2.45702600  |
| C | 4.91287500  | 2.22383200  | -1.06856700 | H | -2.92100700 | -4.07957100 | 3.12717900  |
| H | 4.48029200  | 1.50577400  | -1.76275900 | C | -5.35307600 | -0.76934100 | 2.24671600  |
| C | 6.44906100  | 2.22218000  | -1.21559100 | H | -4.52676000 | -0.72211800 | 2.95535300  |
| H | 6.73579300  | 2.41545400  | -2.25375400 | H | -6.09478500 | -1.46974100 | 2.63828900  |
| H | 6.90074700  | 1.27791200  | -0.90838500 | H | -5.81879500 | 0.21424300  | 2.18496100  |
| H | 6.88691200  | 3.00960000  | -0.59502200 | C | -6.14157400 | -1.33002400 | -0.04281500 |
| C | 4.37907000  | 3.61137100  | -1.46255600 | H | -6.61992900 | -0.35561900 | -0.15925900 |
| H | 4.86351700  | 4.40745300  | -0.89027900 | H | -6.86309800 | -2.01081700 | 0.41540400  |
| H | 3.30682500  | 3.67891800  | -1.30493900 | H | -5.89232800 | -1.71830900 | -1.02924900 |
| H | 4.58451900  | 3.79866500  | -2.52105800 | C | -4.19689000 | 0.97152000  | -0.16488300 |
| C | 3.07179900  | -1.09726300 | 2.46360200  | C | -4.60442200 | 1.15921800  | -1.50227900 |
| H | 2.99281700  | -1.74040500 | 1.59275700  | C | -5.08305600 | 2.41585400  | -1.88204300 |
| C | 1.66651900  | -0.96082200 | 3.07626100  | H | -5.39881000 | 2.57818200  | -2.90620100 |
| H | 1.68526800  | -0.31879000 | 3.96150000  | C | -5.14280700 | 3.46763200  | -0.97485400 |
| H | 1.28789600  | -1.93906300 | 3.38586100  | H | -5.52500000 | 4.43424300  | -1.28475800 |
| H | 0.96445900  | -0.53616700 | 2.35816500  | C | -4.67845200 | 3.28318100  | 0.32155200  |
| C | 4.01908400  | -1.79212500 | 3.46009900  | H | -4.67607600 | 4.12128400  | 1.00905500  |
| H | 5.03448500  | -1.87070100 | 3.06549100  | C | -4.18420900 | 2.04620100  | 0.74792600  |
| H | 3.65788500  | -2.80237800 | 3.67411400  | C | -4.42740500 | 0.07888100  | -2.56152600 |
| H | 4.07198900  | -1.25050800 | 4.40846500  | H | -4.18718300 | -0.85339200 | -2.05109500 |
| C | 5.22133600  | -0.83262100 | -2.32305400 | C | -3.22497500 | 0.41675900  | -3.46600900 |
| H | 4.40997800  | -0.53872300 | -2.98746100 | H | -3.04200100 | -0.39798000 | -4.17379200 |
| H | 5.76078100  | -1.65892400 | -2.79314900 | H | -2.32788200 | 0.57508300  | -2.86694800 |
| H | 5.91425900  | -0.00113700 | -2.23995300 | H | -3.41968400 | 1.32723600  | -4.04187700 |
| C | 5.87267800  | -1.45292200 | 0.01805700  | C | -5.68930100 | -0.15316300 | -3.40929500 |
| H | 6.37563500  | -0.50318000 | 0.20303900  | H | -6.56469600 | -0.35017700 | -2.78685800 |
| H | 6.59983000  | -2.14492000 | -0.41372300 | H | -5.54280600 | -1.00955900 | -4.07394800 |
| H | 5.54410000  | -1.85701400 | 0.97555700  | H | -5.91360800 | 0.71335300  | -4.03762400 |
| C | 1.62602700  | -3.52031200 | -0.75283200 | C | -3.51974500 | 1.95167600  | 2.11643700  |
| H | 0.60087500  | -3.43719000 | -1.11629200 | H | -3.29219800 | 0.90383000  | 2.30682000  |
| H | 2.03574400  | -4.39974100 | -1.26019400 | C | -2.17521700 | 2.70340400  | 2.09048800  |
| C | 1.61845900  | -3.80666400 | 0.74950400  | H | -2.33371700 | 3.77859500  | 1.95836200  |
| H | 2.62465400  | -3.95079200 | 1.14954100  | H | -1.55155700 | 2.34927700  | 1.27210500  |
| H | 1.06014600  | -4.72543100 | 0.94863500  | H | -1.63833700 | 2.55611400  | 3.03335100  |
| H | 1.14776200  | -3.00496900 | 1.31822300  | C | -4.39753900 | 2.47065400  | 3.26729800  |
| C | 2.01712300  | -2.06728800 | -2.76188100 | H | -3.89666600 | 2.30087200  | 4.22487400  |
| H | 0.96450100  | -1.76823000 | -2.73704500 | H | -5.36898000 | 1.97395500  | 3.30160400  |
| H | 2.56020100  | -1.20507000 | -3.15219500 | H | -4.57488500 | 3.54601900  | 3.17762300  |

**xyz coordinates of optimized structures of 1•H<sup>+</sup> (most stable conformer )**  
(E = -2250.184796)

|   | x           | y           | z           |   | x           | y           | z           |
|---|-------------|-------------|-------------|---|-------------|-------------|-------------|
| O | -1.69804400 | 1.27832500  | 0.39968900  | H | 5.41594900  | 2.80789800  | 2.76903800  |
| N | 3.36133700  | -0.16235500 | 0.37171300  | H | 4.36256300  | 4.11726800  | 3.29144000  |
| N | -3.29322600 | -0.78875100 | -0.22674300 | H | 5.16905200  | 4.21452500  | 1.72698800  |
| C | 4.80668700  | 0.04418600  | 0.79871000  | C | 0.71652300  | 2.53265400  | -0.15749300 |
| C | 5.02550900  | 1.46444400  | 0.29662100  | C | 0.36913100  | 2.99049700  | -1.43680500 |
| H | 5.33753400  | 1.41545200  | -0.74708200 | H | 0.54075900  | 2.35056300  | -2.29320300 |
| H | 5.81525800  | 1.97872600  | 0.83795700  | C | -0.18639900 | 4.25262500  | -1.61852000 |
| C | 3.66410900  | 2.18396700  | 0.39568900  | H | -0.43789100 | 4.58986000  | -2.61719800 |
| C | 2.66417300  | 0.99475200  | 0.21395800  | C | -0.43481500 | 5.07470800  | -0.51903700 |
| C | 1.27559700  | 1.13979800  | -0.00670200 | H | -0.87269300 | 6.05575400  | -0.66019500 |
| C | 0.33012300  | 0.07973000  | -0.18886700 | C | -0.13968000 | 4.61723000  | 0.76292600  |
| H | 0.71476000  | -0.89714700 | -0.42319400 | H | -0.35328100 | 5.23579800  | 1.62659500  |
| C | -1.05887400 | 0.16854400  | -0.08729700 | C | 0.42751400  | 3.35457100  | 0.94242700  |
| C | -1.97484200 | -0.86704700 | -0.45454800 | H | 0.63109000  | 2.99504500  | 1.94306200  |
| C | -1.64204200 | -2.18670500 | -1.16549700 | C | -0.75972400 | -2.01760500 | -2.43031200 |
| C | -3.04078800 | -2.69313300 | -1.58576500 | H | 0.28459800  | -1.91619700 | -2.13833300 |
| H | -3.24042800 | -2.40105700 | -2.61658700 | H | -0.81875500 | -2.96020900 | -2.98214000 |
| H | -3.11578500 | -3.77683700 | -1.54409000 | C | -1.15215700 | -0.86738800 | -3.36221400 |
| C | -4.06549400 | -2.02570400 | -0.67168200 | H | -0.52383300 | -0.87485400 | -4.25477900 |
| C | 2.94805400  | -1.49476700 | 0.01011300  | H | -1.02974100 | 0.10343400  | -2.87761800 |
| C | 2.54093200  | -2.40478600 | 1.00758800  | H | -2.19032400 | -0.94343500 | -3.69507200 |
| C | 2.34150800  | -3.73777900 | 0.63387700  | C | -0.96433300 | -3.14314400 | -0.14126000 |
| H | 2.03579900  | -4.45867400 | 1.38245200  | H | 0.02063000  | -2.74794000 | 0.09540700  |
| C | 2.49736500  | -4.14915300 | -0.68233800 | H | -1.52307400 | -3.12334100 | 0.79693200  |
| H | 2.32911700  | -5.18542900 | -0.94957900 | C | -0.81044500 | -4.59641600 | -0.59606000 |
| C | 2.84154000  | -3.22645800 | -1.66169900 | H | -0.25043100 | -5.15336200 | 0.15786300  |
| H | 2.93638600  | -3.55513900 | -2.68913700 | H | -0.25886200 | -4.67362800 | -1.53437000 |
| C | 3.09230300  | -1.88994400 | -1.34152700 | H | -1.77354300 | -5.09491300 | -0.72153500 |
| C | 2.26148400  | -1.99145600 | 2.44770600  | C | -4.44227900 | -2.88558100 | 0.54313900  |
| H | 2.57849800  | -0.95701800 | 2.56838700  | H | -3.57609400 | -3.19276700 | 1.12619100  |
| C | 3.02967200  | -2.85867800 | 3.46183600  | H | -4.94554000 | -3.78613800 | 0.18646600  |
| H | 2.93582300  | -2.43400400 | 4.46467500  | H | -5.13247800 | -2.34847700 | 1.19306100  |
| H | 4.09155600  | -2.93218500 | 3.21881600  | C | -5.34806600 | -1.67887400 | -1.43020400 |
| H | 2.62785100  | -3.87479900 | 3.49479500  | H | -6.04577800 | -1.11272600 | -0.81221300 |
| C | 0.75471200  | -2.03494900 | 2.76475700  | H | -5.83175100 | -2.61570200 | -1.71468900 |
| H | 0.35407100  | -3.04420600 | 2.64016600  | H | -5.14282900 | -1.12170500 | -2.34166600 |
| H | 0.18669100  | -1.36132000 | 2.12279600  | C | -4.03327200 | 0.25064500  | 0.47493800  |
| H | 0.58823500  | -1.73130600 | 3.80147300  | C | -4.66405400 | 1.25422500  | -0.28604000 |
| C | 3.52015100  | -0.92805800 | -2.44745200 | C | -5.47255300 | 2.17180900  | 0.38876200  |
| H | 3.92577600  | -0.03460800 | -1.97586800 | H | -5.96487000 | 2.95760900  | -0.17125700 |
| C | 2.32685600  | -0.48292100 | -3.30982200 | C | -5.63738200 | 2.11013400  | 1.76726200  |
| H | 1.88331000  | -1.33799000 | -3.82562900 | H | -6.27529100 | 2.82735400  | 2.27134600  |
| H | 2.65737700  | 0.23339300  | -4.06647800 | C | -4.95358500 | 1.15025600  | 2.50105400  |
| H | 1.55159400  | -0.00516100 | -2.71088100 | H | -5.04285500 | 1.14345500  | 3.58070800  |
| C | 4.61961800  | -1.51269400 | -3.35357300 | C | -4.12459700 | 0.21102600  | 1.87865500  |
| H | 5.45499800  | -1.91577800 | -2.77788600 | C | -4.40757000 | 1.45085200  | -1.77634500 |
| H | 5.00435800  | -0.73157600 | -4.01433600 | H | -3.88115500 | 0.57307100  | -2.15152100 |
| H | 4.23243200  | -2.31569200 | -3.98564900 | C | -3.47593000 | 2.65728300  | -2.00350400 |
| C | 4.97658800  | -0.07202400 | 2.32383000  | H | -3.25671900 | 2.76803300  | -3.06962700 |
| H | 4.25378700  | 0.52484600  | 2.87624700  | H | -2.53698700 | 2.53264300  | -1.46774800 |
| H | 5.97821600  | 0.27476400  | 2.58786500  | H | -3.94704000 | 3.58205500  | -1.65720700 |
| H | 4.89281200  | -1.10665300 | 2.64849200  | C | -5.69961200 | 1.61728400  | -2.59489200 |
| C | 5.76634700  | -0.94979600 | 0.14177500  | H | -6.40850800 | 0.80789600  | -2.41214100 |
| H | 5.54776800  | -1.97835800 | 0.43355800  | H | -5.46340200 | 1.63158400  | -3.66236300 |
| H | 6.77817100  | -0.71156400 | 0.47697400  | H | -6.20044800 | 2.55976900  | -2.35847100 |
| H | 5.75059900  | -0.88014800 | -0.94286700 | C | -3.27055800 | -0.70100400 | 2.75345600  |
| C | 3.60841800  | 3.29301400  | -0.69206700 | H | -2.75353600 | -1.41450800 | 2.11287100  |
| H | 2.72793100  | 3.91359700  | -0.53585800 | C | -2.18559700 | 0.12471300  | 3.47533400  |
| H | 4.46937600  | 3.94204700  | -0.50010500 | H | -2.64135600 | 0.85960000  | 4.14450700  |
| C | 3.64826500  | 2.83883300  | -2.15317200 | H | -1.55856900 | 0.65661600  | 2.76050300  |
| H | 4.59432600  | 2.36361200  | -2.42100000 | H | -1.55111300 | -0.53249300 | 4.07479000  |
| H | 3.52113200  | 3.70106200  | -2.81219800 | C | -4.09008100 | -1.49953900 | 3.78200400  |
| C | 2.84700600  | 2.13440400  | -2.37687100 | H | -3.43920500 | -2.20113600 | 4.31056700  |
| C | 3.44780400  | 2.86399300  | 1.79379400  | H | -4.89416900 | -2.06998600 | 3.31471300  |
| H | 2.68774900  | 3.63151100  | 1.66457100  | H | -4.53798300 | -0.83966200 | 4.52972800  |
| H | 3.02629600  | 2.14511700  | 2.49999100  | H | -1.06884000 | 1.98673600  | 0.59128400  |
| C | 4.67566000  | 3.53147400  | 2.42332800  |   |             |             |             |

**xyz coordinates of optimized structures of 1•H<sup>+</sup> (conformer 2)**  
(E = -2250.182058)

|   | x           | y           | z           |   | x           | y           | z           |
|---|-------------|-------------|-------------|---|-------------|-------------|-------------|
| O | 1.59841300  | 1.16994500  | 0.32105400  | H | 6.26833800  | 2.42374800  | -2.14213600 |
| N | 3.79038300  | -0.28749300 | -0.35770400 | C | 5.91449900  | -0.33985400 | -1.72731800 |
| N | -3.54161900 | -0.48133100 | 0.46446700  | H | 5.45350300  | 0.19231600  | -2.55719600 |
| C | 4.21940800  | 0.59092000  | 1.90698200  | H | 6.65882000  | -1.02537100 | -2.13789500 |
| C | 4.16072200  | 0.81391700  | 0.51705000  | H | 6.43076200  | 0.37372400  | -1.08426400 |
| C | -3.81562500 | 0.12161600  | -1.90459400 | C | 1.63507200  | -0.76056900 | -3.41152600 |
| C | 2.61388900  | -2.06866900 | -1.37399900 | H | 0.98385500  | -0.87830600 | -4.28026800 |
| C | -1.13681000 | -0.13087900 | 0.19211500  | H | 2.62865400  | -0.49222900 | -3.77926100 |
| C | 4.89068600  | -1.15936200 | -0.94212200 | H | 1.25891500  | 0.08067400  | -2.82587700 |
| C | -1.11810600 | 2.08360300  | -1.04113500 | C | 4.71024300  | -1.30369700 | 3.55323500  |
| H | -1.16706200 | 1.55110000  | -1.98153200 | H | 5.66537200  | -1.51195700 | 3.06822400  |
| C | -1.21170200 | 1.36940900  | 0.15925800  | H | 4.31482400  | -2.24521900 | 3.94409700  |
| C | 1.38137400  | -0.11575000 | -0.10099800 | H | 4.90155200  | -0.64827200 | 4.40657500  |
| C | 2.55773300  | -0.77638800 | -0.55050100 | C | -1.99788200 | -1.12604300 | -3.15929500 |
| C | -3.96647000 | 0.48131600  | -0.54095500 | H | -1.66002000 | -2.11426200 | -3.48237600 |
| C | 4.67982700  | 1.63526800  | 2.71520800  | H | -1.21523500 | -0.68284100 | -2.54455100 |
| H | 4.73466200  | 1.49098500  | 3.78751100  | H | -2.11447600 | -0.50936200 | -4.05397200 |
| C | -4.53334200 | 1.72834500  | -0.18962700 | C | 2.32334400  | -4.65230500 | -1.15878600 |
| C | -3.32494400 | -1.23825700 | -2.38848500 | H | 1.49967700  | -4.72605400 | -1.87092300 |
| H | -3.15406500 | -1.87204500 | -1.52214700 | H | 2.19427300  | -5.44784300 | -0.42109200 |
| C | -1.15318400 | 2.07470600  | 1.37042700  | H | 3.25304600  | -4.84982100 | -1.69759700 |
| H | -1.22770000 | 1.52992800  | 2.30480800  | C | -2.19589700 | -2.23348800 | 1.34630000  |
| C | 0.12654600  | -0.71925400 | -0.07138600 | C | -4.83567600 | 2.16659700  | 1.23608900  |
| H | 0.13135100  | -1.76999400 | -0.28646400 | H | -4.30115400 | 1.50171700  | 1.91382300  |
| C | 1.65442800  | -2.05624000 | -2.59455200 | C | -4.94515200 | -0.87928800 | 2.56312800  |
| H | 1.95833200  | -2.88215600 | -3.24342700 | H | -4.09506000 | -0.53289000 | 3.14856300  |
| H | 0.64011500  | -2.29135900 | -2.27169100 | H | -5.41469300 | -1.70186900 | 3.10717300  |
| C | -0.93665000 | 3.46287100  | -1.03216900 | H | -5.67228400 | -0.07726400 | 2.50192400  |
| H | -0.85704300 | 3.99956000  | -1.97033200 | C | -4.37979600 | -1.94565200 | -3.26167700 |
| C | -2.25234900 | -0.90663200 | 0.55950700  | H | -4.51875100 | -1.42904000 | -4.21473500 |
| C | 4.08364200  | -2.08171500 | -1.86317100 | H | -5.35105300 | -1.99481900 | -2.76546200 |
| H | 4.13776600  | -1.70632300 | -2.88485600 | H | -4.05463400 | -2.96652100 | -3.48047600 |
| H | 4.49766900  | -3.08847200 | -1.87046000 | C | -1.65202400 | -1.83976900 | 2.76307100  |
| C | 2.34244700  | -3.29503900 | -0.44902800 | H | -0.60747100 | -1.54351100 | 2.62898700  |
| H | 3.10137700  | -3.31145400 | 0.33601700  | H | -2.16763300 | -0.94333500 | 3.11194600  |
| H | 1.39363900  | -3.16239300 | 0.06686200  | C | -6.35369500 | 2.07283900  | 1.50653500  |
| C | 3.69895400  | -0.67661100 | 2.57880900  | H | -6.56901700 | 2.27710000  | 2.55924200  |
| H | 3.48478800  | -1.41594900 | 1.80951000  | H | -6.76915800 | 1.09672500  | 1.25493700  |
| C | 5.63129200  | -1.91827900 | 0.16998300  | H | -6.88367900 | 2.81525400  | 0.90347500  |
| H | 6.13074900  | -1.22368500 | 0.84631100  | C | -3.67268300 | -2.66863000 | 1.32869700  |
| H | 6.39388600  | -2.54922300 | -0.29038200 | H | -3.84438700 | -3.31286800 | 0.46543300  |
| C | 4.97193400  | -2.55982200 | 0.75115400  | H | -3.94898800 | -3.24098500 | 2.21240700  |
| H | 4.45110200  | 2.07192300  | -0.04743200 | C | -5.76287300 | -1.65170800 | 0.31905000  |
| C | -4.88108600 | 2.61200100  | -1.21601900 | H | -6.31725800 | -0.73273700 | 0.12647500  |
| H | -5.30910000 | 3.57299500  | -0.96050900 | H | -6.42192800 | -2.34184900 | 0.85004500  |
| C | -4.16531400 | 1.05413800  | -2.88408200 | H | -5.49953800 | -2.10160200 | -0.63744300 |
| H | -4.03846000 | 0.79541500  | -3.92830000 | C | -1.32538600 | -3.40298100 | 0.81670700  |
| C | 4.90904000  | 3.07787300  | 0.80724000  | H | -0.27859200 | -3.21242200 | 1.06004900  |
| H | 5.13789600  | 4.05534000  | 0.39994700  | H | -1.59880600 | -4.26897300 | 1.42600100  |
| C | 5.04329900  | 2.86074600  | 2.17299400  | C | 2.95451400  | 3.37671200  | -1.60031200 |
| H | 5.40208200  | 3.65544100  | 2.81734900  | H | 2.07187400  | 2.93784700  | -1.13810600 |
| C | -4.52267100 | -1.40124000 | 1.17633400  | H | 2.73133200  | 3.58911500  | -2.65027200 |
| C | 4.16455400  | 2.42396200  | -1.50415200 | H | 3.16792700  | 4.32793300  | -1.10373900 |
| H | 3.88721900  | 1.50997100  | -2.02999400 | C | -4.37721900 | 3.60309700  | 1.54795900  |
| C | -0.93772900 | 3.45412700  | 1.37894600  | H | -5.00428700 | 4.34364800  | 1.04482900  |
| H | -0.86290800 | 3.97976200  | 2.32355100  | H | -3.34754100 | 3.77019900  | 1.24570900  |
| C | -0.82194700 | 4.14942000  | 0.17703700  | H | -4.45606600 | 3.78700700  | 2.62307200  |
| H | -0.64969500 | 5.21917700  | 0.18205600  | C | -1.46209500 | -3.80113000 | -0.65339900 |
| C | -4.68482400 | 2.29544100  | -2.55097200 | H | -1.19116400 | -2.99297100 | -1.33199700 |
| H | -4.94836500 | 3.00536900  | -3.32662200 | H | -2.47925800 | -4.10785500 | -0.90473300 |
| C | 2.36719900  | -0.39062200 | 3.30295300  | H | -0.80641200 | -4.64728300 | -0.86906800 |
| H | 2.51662400  | 0.30879700  | 4.13025100  | C | -1.73835900 | -2.91603600 | 3.84775000  |
| H | 1.95518800  | -1.31716900 | 3.71277700  | H | -2.76934600 | -3.21799700 | 4.04627900  |
| H | 1.63202700  | 0.04086200  | 2.62378900  | H | -1.32837100 | -2.52303600 | 4.78160100  |
| C | 5.37634700  | 3.04667900  | -2.22080700 | H | -1.16646400 | -3.80953300 | 3.59004400  |
| H | 5.61699200  | 4.02882600  | -1.80532700 | H | 0.80926400  | 1.52765600  | 0.74922500  |
| H | 5.15014900  | 3.18630400  | -3.28150800 |   |             |             |             |

**xyz coordinates of optimized structures of c-1 at other levels of theory**  
*B3LYP/6-31g(d)* (E = -2248.912418)

|   | x           | y           | z           |   | x           | y           | z           |
|---|-------------|-------------|-------------|---|-------------|-------------|-------------|
| O | -0.18219400 | -1.33458300 | 0.27563700  | C | -0.62138200 | -1.71022700 | 4.47524500  |
| N | -2.58765800 | -0.99116400 | 0.00208000  | H | -1.10287400 | -2.69562700 | 4.47945500  |
| N | 3.34305400  | -0.22065100 | -0.40283600 | H | -1.21889200 | -1.04277300 | 5.10485900  |
| C | -2.93809800 | -2.38497900 | 0.44859900  | H | 0.35570900  | -1.82283600 | 4.95991000  |
| C | -2.30621500 | -2.44328300 | 1.87241100  | C | -1.57466800 | 2.21016000  | 0.63093800  |
| H | -1.50045300 | -3.18433000 | 1.88367300  | C | -1.54195400 | 2.95370000  | 1.82244100  |
| H | -3.04032300 | -2.76842400 | 2.61352800  | H | -1.10106200 | 2.51278100  | 2.71101600  |
| C | -1.71254000 | -1.05081100 | 2.19387700  | C | -2.04384900 | 4.25496800  | 1.87541400  |
| C | -1.40064100 | -0.54915300 | 0.71086300  | H | -2.00635700 | 4.80782200  | 2.81071000  |
| C | -0.88792600 | 0.88604800  | 0.52576800  | C | -2.57407100 | 4.84968800  | 0.72940100  |
| C | 0.43656400  | 0.85095700  | 0.25361600  | H | -2.95965600 | 5.86520100  | 0.76752000  |
| H | 1.04715400  | -1.73512600 | 0.14665300  | C | -2.59436800 | 4.13262500  | -0.46735400 |
| C | 0.92497200  | -0.49444000 | 0.10682900  | H | -2.99379300 | 4.58744800  | -1.37014500 |
| C | 2.17199000  | -0.98607500 | -0.16796700 | C | -2.10075500 | 2.82804400  | -0.51661800 |
| C | 2.50034300  | -2.48558800 | -0.36544100 | H | -2.11632800 | 2.28233800  | -1.45396700 |
| C | 4.03825500  | -2.46826000 | -0.54037700 | C | 1.77670800  | -3.01174200 | -1.64628300 |
| H | 4.38534100  | -3.23041000 | -1.24340700 | H | 0.70258700  | -2.88468500 | -1.49376100 |
| H | 4.52397700  | -2.67666900 | 0.41733200  | H | 2.03781000  | -2.36355900 | -2.48803500 |
| C | 4.44136500  | -1.05283900 | -0.99692800 | C | 2.04396500  | -4.46831200 | -2.05424100 |
| C | -3.19784500 | -0.35650300 | -1.15147000 | H | 1.64802500  | -5.18534300 | -1.32821200 |
| C | -4.43072500 | 0.35756500  | -0.99726000 | H | 3.11142900  | -4.68098500 | -2.18472300 |
| C | -4.99686200 | 0.99931700  | -2.10619100 | H | 1.55422000  | -4.67702200 | -3.01277000 |
| H | -5.92411200 | 1.54992800  | -1.97576300 | C | 2.08705000  | -3.39922700 | 0.82604200  |
| C | -4.40746100 | 0.95958500  | -3.36154500 | H | 0.99464600  | -3.39982500 | 0.88664000  |
| H | -4.86465400 | 1.47124800  | -4.20488700 | H | 2.38252900  | -4.42376700 | 0.56725800  |
| C | -3.23171500 | 0.24323900  | -3.52188600 | C | 2.66168500  | -3.08620700 | 2.21173000  |
| H | -2.77502700 | 0.18867600  | -4.50599600 | H | 2.23998300  | -3.77770900 | 2.95087900  |
| C | -2.61861700 | -0.42580300 | -2.45175900 | H | 2.42011300  | -2.07111700 | 2.53562100  |
| C | -5.22601100 | 0.48566100  | 0.30570300  | H | 3.75054900  | -3.20287800 | 2.25307400  |
| H | -4.71474900 | -0.09802700 | 1.06663100  | C | 4.50639400  | -0.97077600 | -2.53985200 |
| C | -6.65850900 | -0.07470800 | 0.16089700  | H | 3.53023500  | -1.12132600 | -3.00567900 |
| H | -7.15156500 | -0.10148200 | 1.14050500  | H | 5.18340900  | -1.74575200 | -2.91922000 |
| H | -6.67068500 | -1.08628100 | -0.25361800 | H | 4.89710700  | -0.00770100 | -2.87235600 |
| H | -7.27062700 | 0.55762000  | -0.49236100 | C | 5.82729800  | -0.67343700 | -0.45826800 |
| C | -5.30956400 | 1.93610800  | 0.82163600  | H | 6.08866000  | 0.36206900  | -0.69875600 |
| H | -5.80045400 | 2.59241500  | 0.09364200  | H | 6.57990100  | -1.32276000 | -0.91988600 |
| H | -4.32443200 | 2.35454400  | 1.03284600  | H | 5.89187500  | -0.80444100 | 0.62345100  |
| H | -5.90094800 | 1.96738400  | 1.74545600  | C | 3.55363800  | 1.15759800  | -0.02393500 |
| C | -1.35272600 | -1.20571700 | -2.79163600 | C | 3.41131200  | 2.21507200  | -0.96648200 |
| H | -0.98141000 | -1.65600000 | -1.87373700 | C | 3.69012600  | 3.52861100  | -0.56235100 |
| C | -1.63587200 | -2.32721000 | -3.81375900 | H | 3.58594000  | 4.33499300  | -1.28263400 |
| H | -2.45872500 | -2.97634400 | -3.49863600 | C | 4.08278600  | 3.82781400  | 0.73473700  |
| H | -0.74428800 | -2.95199400 | -3.94806200 | H | 4.28914600  | 4.85489000  | 1.02450800  |
| H | -1.89997800 | -1.91681800 | -4.79578500 | C | 4.20014600  | 2.79803000  | 1.65878800  |
| C | -0.24520200 | -0.28327900 | -3.33377800 | H | 4.49824400  | 3.02991000  | 2.67749600  |
| H | -0.55748800 | 0.22833300  | -4.25208900 | C | 3.95042800  | 1.46568400  | 1.30900700  |
| H | 0.65216100  | -0.86547700 | -3.57116800 | C | 2.93944100  | 2.02574100  | -2.40695100 |
| H | 0.02701800  | 0.47536200  | -2.59742400 | H | 2.71734300  | 0.96629600  | -2.55097500 |
| C | -4.44816500 | -2.66661500 | 0.48402600  | C | 1.64785600  | 2.81850800  | -2.70079900 |
| H | -4.97816800 | -2.07122500 | 1.22800200  | H | 0.84059000  | 2.56591600  | -2.00863400 |
| H | -4.60302100 | -3.72115900 | 0.73815200  | H | 1.29930400  | 2.60379500  | -3.71776000 |
| H | -4.90769900 | -2.49368000 | -0.49382800 | H | 1.81806400  | 3.89914100  | -2.63256700 |
| C | -2.31805400 | -3.48287000 | -0.44384800 | C | 4.02168000  | 2.44943500  | -3.42358200 |
| H | -2.75242700 | -3.46923400 | -1.44787700 | H | 4.16836200  | 3.53592100  | -3.40884000 |
| H | -2.52737500 | -4.46819100 | -0.00860800 | H | 3.72179000  | 2.17184700  | -4.44113900 |
| H | -1.23694300 | -3.36855200 | -0.52237800 | H | 4.99328000  | 1.99045000  | -3.21710200 |
| C | -2.70530800 | -0.06762500 | 2.89325600  | C | 4.09194700  | 0.41967200  | 2.41015100  |
| H | -3.19774700 | 0.55178100  | 2.14396600  | H | 3.95772800  | -0.56295400 | 1.95512000  |
| H | -2.11051200 | 0.62975500  | 3.49544400  | C | 2.99222300  | 0.59896900  | 3.47473700  |
| C | -3.79416600 | -0.65736000 | 3.80271200  | H | 3.10496400  | 1.55436300  | 4.00122600  |
| H | -3.39162700 | -1.32122800 | 4.57410300  | H | 3.04354900  | -0.20159500 | 4.22273200  |
| H | -4.54322100 | -1.22488900 | 3.24067800  | H | 1.99904800  | 0.58103800  | 3.01989200  |
| H | -4.32396700 | 0.15607500  | 4.31287400  | C | 5.47716800  | 0.44428200  | 3.08848000  |
| C | -0.43673400 | -1.16751700 | 3.05124200  | H | 6.29465800  | 0.36805600  | 2.36479500  |
| H | 0.02478400  | -0.17430700 | 3.11619800  | H | 5.56551900  | -0.39258900 | 3.79168600  |
| H | 0.27258100  | -1.80685400 | 2.52678800  | H | 5.63003100  | 1.36656000  | 3.66074500  |

B3L YP/6-311g(d,p)  
(E = -2249.480290)

|   | x           | y           | z           |   | x           | y           | z           |
|---|-------------|-------------|-------------|---|-------------|-------------|-------------|
| O | -0.18378600 | -1.32645500 | 0.29245200  | C | -0.60953700 | -1.60796300 | 4.50125500  |
| N | -2.58828900 | -0.98512200 | 0.02289000  | H | -1.08650100 | -2.59225100 | 4.52757000  |
| N | 3.34284600  | -0.23358300 | -0.39029500 | H | -1.20535400 | -0.93040000 | 5.11692400  |
| C | -2.93988600 | -2.36921500 | 0.50192300  | H | 0.36674500  | -1.70740700 | 4.98434000  |
| C | -2.29669600 | -2.39869800 | 1.91935100  | C | -1.56710200 | 2.22657300  | 0.58733400  |
| H | -1.48698200 | -3.13117900 | 1.93415400  | C | -1.52635500 | 2.99459600  | 1.75961800  |
| H | -3.02167700 | -2.71401000 | 2.66950600  | H | -1.08178000 | 2.57468800  | 2.65343800  |
| C | -1.70778700 | -1.00021600 | 2.21130200  | C | -2.02417500 | 4.29543300  | 1.78652500  |
| C | -1.40205000 | -0.52890800 | 0.71825600  | H | -1.97896800 | 4.86827700  | 2.70639500  |
| C | -0.88290600 | 0.89979300  | 0.50622300  | C | -2.55963700 | 4.86448200  | 0.63321300  |
| C | 0.43746400  | 0.85572600  | 0.23261300  | H | -2.94087900 | 5.87945400  | 0.65052900  |
| H | 1.04903200  | 1.73412400  | 0.10871200  | C | -2.59108900 | 4.12134600  | -0.54387200 |
| C | 0.92356800  | -0.49135000 | 0.11369000  | H | -2.99572100 | 4.55509200  | -1.45165000 |
| C | 2.16884500  | -0.98733200 | -0.14696700 | C | -2.10245200 | 2.81686500  | -0.56648900 |
| C | 2.49223500  | -2.49089600 | -0.31232100 | H | -2.12905500 | 2.25052700  | -1.48843300 |
| C | 4.02945300  | -2.48432800 | -0.47728100 | C | 1.77086000  | -3.03654300 | -1.58468100 |
| H | 4.37669500  | -3.26037300 | -1.16031500 | H | 0.69885200  | -2.92016600 | -1.42558300 |
| H | 4.50546300  | -2.67334500 | 0.48611000  | H | 2.01871800  | -2.39251000 | -2.43007600 |
| C | 4.44287300  | -1.08280400 | -0.95938000 | C | 2.05575800  | -4.49192700 | -1.98019300 |
| C | -3.20151500 | -0.37796800 | -1.14359000 | H | 1.68834400  | -5.20557000 | -1.23981500 |
| C | -4.43192700 | 0.33813200  | -1.00332400 | H | 3.12132300  | -4.68637000 | -2.13064900 |
| C | -4.99937800 | 0.95407000  | -2.12273800 | H | 1.55197400  | -4.72104600 | -2.92365900 |
| H | -5.92420400 | 1.50653400  | -2.00399200 | C | 2.06786500  | -3.37627900 | 0.89465600  |
| C | -4.41360300 | 0.88483900  | -3.37562000 | H | 0.97832000  | -3.35912700 | 0.95319500  |
| H | -4.87127100 | 1.37644300  | -4.22743700 | H | 2.34767700  | -4.40679100 | 0.65367200  |
| C | -3.24197200 | 0.16466200  | -3.52286400 | C | 2.64876400  | -3.04446300 | 2.27219300  |
| H | -2.79035600 | 0.08752900  | -4.50505600 | H | 2.21352500  | -3.70849200 | 3.02472800  |
| C | -2.62762200 | -0.47901100 | -2.44111700 | H | 2.42916600  | -2.02007700 | 2.57323300  |
| C | -5.22215700 | 0.49449900  | 0.29844400  | H | 3.73207800  | -3.18435700 | 2.31620100  |
| H | -4.70753500 | -0.07380000 | 1.06525800  | C | 4.51850800  | -1.03432100 | -2.50188100 |
| C | -6.65489700 | -0.06642400 | 0.17085100  | H | 3.54838100  | -1.19935000 | -2.96920900 |
| H | -7.14139300 | -0.07775800 | 1.15124300  | H | 5.19943600  | -1.81418000 | -2.85601800 |
| H | -6.66966100 | -1.08148500 | -0.22747800 | H | 4.90767200  | -0.07984600 | -2.85152000 |
| H | -7.26752300 | 0.55577900  | -0.48732900 | C | 5.82447600  | -0.69865600 | -0.41713300 |
| C | -5.29957300 | 1.95432000  | 0.78456100  | H | 6.09107900  | 0.32860400  | -0.67558200 |
| H | -5.80798100 | 2.59088800  | 0.05491000  | H | 6.57592800  | -1.35900100 | -0.85850700 |
| H | -4.31380700 | 2.37958600  | 0.96295800  | H | 5.87708400  | -0.80843100 | 0.66478900  |
| H | -5.86835100 | 2.00385400  | 1.71856400  | C | 3.55247900  | 1.15471900  | -0.04953700 |
| C | -1.36556900 | -1.26965400 | -2.76639400 | C | 3.41399900  | 2.18417600  | -1.01888000 |
| H | -0.99596800 | -1.69968500 | -1.84095900 | C | 3.68852700  | 3.50633000  | -0.64986000 |
| C | -1.65533400 | -2.41159300 | -3.76216300 | H | 3.58899500  | 4.29171200  | -1.39004300 |
| H | -2.48095200 | -3.04564800 | -3.43333000 | C | 4.07138400  | 3.84002000  | 0.63859000  |
| H | -0.77024200 | -3.04397500 | -3.88041400 | H | 4.27426700  | 4.87251800  | 0.90112900  |
| H | -1.91505300 | -2.02191300 | -4.75088700 | C | 4.18492800  | 2.83801900  | 1.58923100  |
| C | -0.25747900 | -0.36270600 | -3.32917500 | H | 4.47728500  | 3.09806700  | 2.60011800  |
| H | -0.57487300 | 0.13727600  | -4.24893100 | C | 3.93977800  | 1.49875200  | 1.27446400  |
| H | 0.63160900  | -0.95244800 | -3.56591800 | C | 2.95153300  | 1.95434800  | -2.45542400 |
| H | 0.02631300  | 0.40141700  | -2.60718700 | H | 2.73321700  | 0.89315500  | -2.56750900 |
| C | -4.44906600 | -2.64405300 | 0.55665300  | C | 1.66072800  | 2.73449100  | -2.77751100 |
| H | -4.96935000 | -2.02764500 | 1.28611100  | H | 0.85190100  | 2.49456500  | -2.08719400 |
| H | -4.60300400 | -3.68865400 | 0.83991100  | H | 1.32111800  | 2.49521600  | -3.78918900 |
| H | -4.91367600 | -2.49781700 | -0.42033200 | H | 1.82688200  | 3.81428900  | -2.73255100 |
| C | -2.33034800 | -3.48473700 | -0.37340000 | C | 4.03920800  | 2.34872600  | -3.47659600 |
| H | -2.77876300 | -3.49349700 | -1.36830800 | H | 4.17468800  | 3.43381800  | -3.50136600 |
| H | -2.53241700 | -4.45711100 | 0.08712100  | H | 3.75284000  | 2.02998500  | -4.48324700 |
| H | -1.25329000 | -3.36889100 | -0.46804700 | H | 5.00998800  | 1.90799900  | -3.24310700 |
| C | -2.70239500 | -0.00564600 | 2.88803600  | C | 4.08485400  | 0.48248700  | 2.40152600  |
| H | -3.20145500 | 0.58687700  | 2.12529800  | H | 3.94850400  | -0.50829900 | 1.97132800  |
| H | -2.10783300 | 0.71033500  | 3.46269800  | C | 2.99214600  | 0.68737500  | 3.46723000  |
| C | -3.78156200 | -0.57556800 | 3.81964100  | H | 3.11007200  | 1.65248400  | 3.96889500  |
| H | -3.37166700 | -1.20656700 | 4.61057400  | H | 3.04833000  | -0.09364500 | 4.23145300  |
| H | -4.52403000 | -1.16835600 | 3.28072200  | H | 1.99808400  | 0.65989800  | 3.02162100  |
| H | -4.31742800 | 0.24733900  | 4.30211300  | C | 5.47323400  | 0.52532100  | 3.07094000  |
| C | -0.43017200 | -1.09451400 | 3.06660200  | H | 6.28499300  | 0.44379300  | 2.34564900  |
| H | 0.02612000  | -0.10079200 | 3.10846900  | H | 5.57085400  | -0.29812900 | 3.78480700  |
| H | 0.27694600  | -1.74073100 | 2.55316800  | H | 5.62153000  | 1.45563200  | 3.62627100  |

B3LYP/6-311g(d,p) with PCM model for acetonitrile  
(E = -2249.488451)

|   | x           | y           | z           |   | x           | y           | z           |
|---|-------------|-------------|-------------|---|-------------|-------------|-------------|
| O | -0.18774600 | -1.32073900 | 0.29707400  | C | -0.60198100 | -1.56820800 | 4.50995200  |
| N | -2.59237800 | -0.98174100 | 0.03172500  | H | -1.07925700 | -2.55210500 | 4.54406000  |
| N | 3.34210900  | -0.23867000 | -0.38899100 | H | -1.19689300 | -0.88567900 | 5.12103100  |
| C | -2.94210700 | -2.36283200 | 0.52366600  | H | 0.37589200  | -1.66349700 | 4.99102700  |
| C | -2.29344700 | -2.38073400 | 1.93857000  | C | -1.56510500 | 2.23590700  | 0.56760800  |
| H | -1.48249800 | -3.11168300 | 1.95563600  | C | -1.53311500 | 3.00887300  | 1.73772900  |
| H | -3.01515100 | -2.69138200 | 2.69355600  | H | -1.10120400 | 2.59137300  | 2.63880700  |
| C | -1.70551500 | -0.97948200 | 2.21787400  | C | -2.02540200 | 4.31309000  | 1.75476100  |
| C | -1.40257700 | -0.52027400 | 0.72065700  | H | -1.98623900 | 4.88912900  | 2.67287000  |
| C | -0.88385900 | 0.90687100  | 0.49504400  | C | -2.54707300 | 4.88102300  | 0.59343100  |
| C | 0.43612000  | 0.85869100  | 0.21686300  | H | -2.92256600 | 5.89817400  | 0.60275200  |
| H | 1.04886800  | 1.73434200  | 0.07979600  | C | -2.57107700 | 4.13248600  | -0.58165500 |
| C | 0.92189400  | -0.48857600 | 0.11068100  | H | -2.96414500 | 4.56594600  | -1.49481000 |
| C | 2.16823200  | -0.98830800 | -0.14347800 | C | -2.08821400 | 2.82484700  | -0.59320300 |
| C | 2.48931100  | -2.49388900 | -0.29937600 | H | -2.10936500 | 2.25337700  | -1.51238500 |
| C | 4.02671400  | -2.49125700 | -0.46026400 | C | 1.76855100  | -3.04392800 | -1.57054200 |
| H | 4.37510200  | -3.27186900 | -1.13687000 | H | 0.69598000  | -2.93454200 | -1.40881900 |
| H | 4.50010500  | -2.67360900 | 0.50551600  | H | 2.01056600  | -2.39966400 | -2.41735000 |
| C | 4.44370200  | -1.09459800 | -0.95212100 | C | 2.06245700  | -4.49741900 | -1.96689000 |
| C | -3.20780200 | -0.38719800 | -1.13931000 | H | 1.71165900  | -5.21338200 | -1.22040500 |
| C | -4.44137800 | 0.32587600  | -1.00431600 | H | 3.12807200  | -4.68015700 | -2.12971200 |
| C | -5.01615200 | 0.92658500  | -2.12921300 | H | 1.54918100  | -4.73122900 | -2.90424400 |
| H | -5.94340300 | 1.47608600  | -2.01469200 | C | 2.05924200  | -3.37174400 | 0.91121500  |
| C | -4.43360700 | 0.84587400  | -3.38399400 | H | 0.96983700  | -3.34686900 | 0.97075800  |
| H | -4.89584400 | 1.32601400  | -4.23986900 | H | 2.33224100  | -4.40449900 | 0.67278800  |
| C | -3.25787500 | 0.12972700  | -3.52610100 | C | 2.64416700  | -3.04102300 | 2.28753600  |
| H | -2.80845200 | 0.04508200  | -4.50873600 | H | 2.20502900  | -3.70150900 | 3.04115000  |
| C | -2.63701300 | -0.49909500 | -2.43812600 | H | 2.43163300  | -2.01478700 | 2.58784100  |
| C | -5.22709700 | 0.49395700  | 0.29867100  | H | 3.72653300  | -3.18677400 | 2.32952700  |
| H | -4.70886600 | -0.06507100 | 1.06959900  | C | 4.52110000  | -1.05706100 | -2.49446200 |
| C | -6.66041400 | -0.06798600 | 0.18422000  | H | 3.55140000  | -1.22132000 | -2.96312300 |
| H | -7.14152700 | -0.06523000 | 1.16718800  | H | 5.19898900  | -1.84352300 | -2.83875300 |
| H | -6.67543200 | -1.08962900 | -0.19746900 | H | 4.91684400  | -0.10752400 | -2.85033800 |
| H | -7.27496800 | 0.54494900  | -0.48095600 | C | 5.82488000  | -0.70987900 | -0.41064800 |
| C | -5.30337800 | 1.95934400  | 0.76870700  | H | 6.09681100  | 0.31311000  | -0.68091600 |
| H | -5.82687500 | 2.58414400  | 0.03922600  | H | 6.57302700  | -1.37804800 | -0.84528300 |
| H | -4.31470700 | 2.38749500  | 0.92595900  | H | 5.87556200  | -0.81053800 | 0.67212600  |
| H | -5.85753500 | 2.01660500  | 1.71095800  | C | 3.55163200  | -1.15100200 | -0.05360200 |
| C | -1.37056800 | -1.28482700 | -2.75864000 | C | 3.41812900  | 2.17611300  | -1.02886600 |
| H | -0.99349100 | -1.70013400 | -1.82948600 | C | 3.68621500  | 3.50171600  | -0.66442000 |
| C | -1.65454800 | -2.44074600 | -3.74009200 | H | 3.59230700  | 4.28354200  | -1.40919000 |
| H | -2.46983900 | -3.08151100 | -3.39782200 | C | 4.05908400  | 3.84265500  | 0.62614800  |
| H | -0.76253300 | -3.06348700 | -3.85699500 | H | 4.25796100  | 4.87679700  | 0.88539300  |
| H | -1.92467900 | -2.06355100 | -4.73096300 | C | 4.17097100  | 2.84415400  | 1.58214500  |
| C | -0.27283200 | -0.37619500 | -3.33902500 | H | 4.45820400  | 3.10990000  | 2.59302200  |
| H | -0.59604900 | 0.10198900  | -4.26833400 | C | 3.93248200  | 1.50175300  | 1.27121800  |
| H | 0.62302300  | -0.96004900 | -3.56386800 | C | 2.97205700  | 1.93781600  | -2.46918800 |
| H | 0.00239900  | 0.40461600  | -2.63140700 | H | 2.75767100  | 0.87577700  | -2.57910200 |
| C | -4.45052800 | -2.63927900 | 0.58829800  | C | 1.68405300  | 2.71461200  | -2.81037800 |
| H | -4.96839400 | -2.01662900 | 1.31407900  | H | 0.86779700  | 2.47383300  | -2.12839800 |
| H | -4.59977100 | -3.68098400 | 0.88409700  | H | 1.35792600  | 2.46969300  | -3.82514700 |
| H | -4.92112500 | -2.50551800 | -0.38781400 | H | 1.84907400  | 3.79472300  | -2.76855700 |
| C | -2.33550400 | -3.48459300 | -0.34553100 | C | 4.07100700  | 2.32899500  | -3.47955500 |
| H | -2.79070300 | -3.50279600 | -1.33744400 | H | 4.20647600  | 3.41407500  | -3.50550900 |
| H | -2.53357400 | -4.45243600 | 0.12595600  | H | 3.79421800  | 2.00640600  | -4.48757200 |
| H | -1.25928100 | -3.36643900 | -0.44787800 | H | 5.03794100  | 1.88633100  | -3.23389600 |
| C | -2.69937900 | 0.01926700  | 2.88975900  | C | 4.08343100  | 0.49105100  | 2.40287500  |
| H | -3.20122900 | 0.60457200  | 2.12289000  | H | 3.94441900  | -0.50223000 | 1.97960300  |
| H | -2.10367800 | 0.73922300  | 3.45800500  | C | 3.00065400  | 0.70340200  | 3.47756300  |
| C | -3.77560900 | -0.54502500 | 3.82847100  | H | 3.12943100  | 1.66804100  | 3.97748200  |
| H | -3.36146300 | -1.16996900 | 4.62190600  | H | 3.06062000  | -0.07760400 | 4.24135200  |
| H | -4.51904400 | -1.14244500 | 3.29615400  | H | 2.00159800  | 0.67960500  | 3.04239100  |
| H | -4.30998100 | 0.28123100  | 4.30716000  | C | 5.47654000  | 0.53831500  | 3.06283700  |
| C | -0.42575700 | -1.06540600 | 3.07094200  | H | 6.28336500  | 0.44824400  | 2.33301200  |
| H | 0.02840100  | -0.07042900 | 3.10497200  | H | 5.57668700  | -0.28042600 | 3.78152500  |
| H | 0.28101600  | -1.71485800 | 2.56104500  | H | 5.62749700  | 1.47332400  | 3.60950700  |

wb97xd/6-31g(d,p) with PCM model for acetonitrile  
(E = -2248.888173)

|   | x           | y           | z           |   | x           | y           | z           |
|---|-------------|-------------|-------------|---|-------------|-------------|-------------|
| O | -0.14639100 | -1.34366400 | 0.13570000  | C | -0.67641100 | -2.29924400 | 4.18363800  |
| N | -2.51154700 | -1.00776300 | -0.15216800 | H | -1.14320800 | -3.27518500 | 4.01846600  |
| N | 3.30569400  | -0.11507500 | -0.42895500 | H | -1.31273000 | -1.73427100 | 4.86982000  |
| C | -2.82023200 | -2.44770700 | 0.05427400  | H | 0.27952400  | -2.46932800 | 4.68664800  |
| C | -2.23310000 | -2.70198200 | 1.46841200  | C | -1.63554300 | 2.05445400  | 0.89176400  |
| H | -1.40141500 | -3.40752500 | 1.39673400  | C | -1.73836400 | 2.62742300  | 2.16061600  |
| H | -2.97555500 | -3.15242900 | 2.12737700  | H | -1.33895500 | 2.09696700  | 3.01699100  |
| C | -1.69798700 | -1.35929300 | 2.00417100  | C | -2.33269000 | 3.87204000  | 2.33446500  |
| C | -1.35795300 | -0.66052600 | 0.63502400  | H | -2.40501400 | 4.29991400  | 3.32815200  |
| C | -0.88500700 | 0.79061600  | 0.66728300  | C | -2.82252200 | 4.57161300  | 1.23677800  |
| C | 0.43254700  | 0.82576600  | 0.42790100  | H | -3.28526900 | 5.54277400  | 1.37149300  |
| H | 1.02934600  | 1.72380000  | 0.45169400  | C | -2.70638500 | 4.02084900  | -0.03418100 |
| C | 0.93578600  | -0.47946900 | 0.09216200  | H | -3.07667400 | 4.56065600  | -0.89866400 |
| C | 2.15903600  | -0.90591600 | -0.29233400 | C | -2.11729900 | 2.77432600  | -0.20506100 |
| C | 2.47917100  | -2.34623400 | -0.71950200 | H | -2.02849200 | 2.35009100  | -1.19845400 |
| C | 4.00767300  | -2.29508100 | -0.90520100 | C | 1.74584400  | -2.66478400 | -2.04728700 |
| H | 4.34957600  | -2.94070100 | -1.71569400 | H | 0.68124900  | -2.50952700 | -1.88020200 |
| H | 4.50538500  | -2.63305100 | 0.00616400  | H | 2.04302200  | -1.93387900 | -2.80058900 |
| C | 4.38875600  | -0.82846000 | -1.15163800 | C | 1.94951100  | -4.06577100 | -2.62131600 |
| C | -3.08802800 | -0.21936900 | -1.20390200 | H | 1.50518700  | -4.83674900 | -1.98779700 |
| C | -4.33144400 | 0.42963200  | -0.98117500 | H | 3.00709300  | -4.30976000 | -2.75743500 |
| C | -4.87298900 | 1.23536400  | -1.98033200 | H | 1.46977000  | -4.13406700 | -3.60144900 |
| H | -5.81648400 | 1.73901000  | -1.79883500 | C | 2.07449100  | -3.41310200 | 0.32444600  |
| C | -4.23188700 | 1.42169200  | -3.19217400 | H | 0.98243400  | -3.45833400 | 0.35477600  |
| H | -4.66540700 | 2.06248700  | -3.95220800 | H | 2.42053000  | -4.38155700 | -0.05047200 |
| C | -3.03231100 | 0.77439100  | -3.41954700 | C | 2.60215400  | -3.23112700 | 1.74246900  |
| H | -2.52868600 | 0.90913500  | -4.37093400 | H | 2.18691100  | -4.00204700 | 2.39756200  |
| C | -2.45144400 | -0.05024500 | -2.45385800 | H | 2.31451300  | -2.26273200 | 2.14837100  |
| C | -5.13625900 | 0.31718600  | 0.30511600  | H | 3.69128100  | -3.31062900 | 1.79940000  |
| H | -4.61001200 | -0.37321900 | 0.95445800  | C | 4.40986100  | -0.50094900 | -2.65392000 |
| C | -6.54478600 | -0.23961200 | 0.05409500  | H | 3.41893000  | -0.56580500 | -3.10348500 |
| H | -7.03935500 | -0.44499100 | 1.00841800  | H | 5.06823100  | -1.20152800 | -3.17510800 |
| H | -6.52517500 | -1.16445300 | -0.52451000 | H | 4.79309000  | 0.50363800  | -2.82689600 |
| H | -7.16338200 | 0.48130400  | -0.48863700 | C | 5.77132700  | -0.51366400 | -0.58419900 |
| C | -5.24681800 | 1.65024000  | 1.05391500  | H | 6.00754400  | 0.54959500  | -0.67738500 |
| H | -5.78862700 | 2.39445500  | 0.46207800  | H | 6.52169600  | -1.07594900 | -1.14583200 |
| H | -4.26817500 | 2.06272000  | 1.29447800  | H | 5.85093800  | -0.79868900 | 0.46480900  |
| H | -5.79546800 | 1.50252000  | 1.98939800  | C | 3.50561300  | 1.16596200  | 0.17821800  |
| C | -1.12850600 | -0.69799300 | -2.81177500 | C | 3.31825700  | 2.36035400  | -0.54913500 |
| H | -0.81602100 | -1.28619100 | -1.95620200 | C | 3.57386600  | 3.58142300  | 0.07676100  |
| C | -1.24383400 | -1.62458300 | -4.02714200 | H | 3.43918500  | 4.50221400  | -0.48027200 |
| H | -2.03201000 | -2.37026800 | -3.90011900 | C | 3.97857200  | 3.64643400  | 1.39792900  |
| H | -0.29829300 | -2.15332800 | -4.18207700 | H | 4.16472600  | 4.60597000  | 1.86732800  |
| H | -1.46128600 | -1.06144700 | -4.94020400 | C | 4.13146700  | 2.47356500  | 2.11747700  |
| C | -0.05132700 | 0.36102300  | -3.05629100 | H | 4.43289300  | 2.52361300  | 3.15822400  |
| H | -0.29352200 | 0.98914800  | -3.91959400 | C | 3.90718400  | 1.23032600  | 1.53065000  |
| H | 0.91540600  | -0.11187600 | -3.24467000 | C | 2.80796600  | 2.40059400  | -1.97890400 |
| H | 0.05542700  | 1.00320400  | -2.18433700 | H | 2.57262800  | 1.37773400  | -2.27416700 |
| C | -4.31264500 | -2.77301100 | -0.01028500 | C | 1.52472800  | 3.23695200  | -2.10054200 |
| H | -4.88335200 | -2.31091000 | 0.79241100  | H | 0.75249400  | 2.91301800  | -1.40066300 |
| H | -4.43853900 | -3.85486200 | 0.07679000  | H | 1.11712800  | 3.15064100  | -3.11136700 |
| H | -4.74061300 | -2.46426300 | -0.96742100 | H | 1.72404200  | 4.29564600  | -1.91176900 |
| C | -2.13190000 | -3.35722800 | -0.97792200 | C | 3.86583100  | 2.96836200  | -2.93637500 |
| H | -2.52383600 | -3.16842900 | -1.98018200 | H | 4.00261600  | 4.04056900  | -2.76525700 |
| H | -2.33160200 | -4.40497900 | -0.73305000 | H | 3.55415200  | 2.83262600  | -3.97587800 |
| H | -1.05462500 | -3.20332800 | -0.97959200 | H | 4.83921100  | 2.49224500  | -2.80471700 |
| C | -2.73398800 | -0.50861700 | 2.78727400  | C | 4.05632600  | -0.00411200 | 2.39886400  |
| H | -3.18337200 | 0.22208600  | 2.11845600  | H | 3.97746900  | -0.87472500 | 1.74919400  |
| H | -2.18415300 | 0.07945300  | 3.52856100  | C | 2.90917700  | -0.06750000 | 3.41254900  |
| C | -3.85947100 | -1.24516800 | 3.51055600  | H | 2.96348900  | 0.76964800  | 4.11561300  |
| H | -3.48568000 | -2.02652700 | 4.17648200  | H | 2.95040300  | -0.99614500 | 3.98963100  |
| H | -4.55831100 | -1.71448300 | 2.81377300  | H | 1.94644900  | -0.02325600 | 2.90173000  |
| H | -4.43308300 | -0.53784000 | 4.11582100  | C | 5.40938800  | -0.07355800 | 3.11569700  |
| C | -0.44995500 | -1.55955300 | 2.86794200  | H | 6.24371100  | 0.04524500  | 2.42028300  |
| H | -0.02307000 | -0.57407300 | 3.08220400  | H | 5.51618800  | -1.04083100 | 3.61490400  |
| H | 0.28741500  | -2.10189500 | 2.27997500  | H | 5.49958200  | 0.70273200  | 3.88105000  |



B97D3/6-311g(d,p) with PCM model for acetonitrile  
(E = -2248.167231)

|   | x           | y           | z           |   | x           | y           | z           |
|---|-------------|-------------|-------------|---|-------------|-------------|-------------|
| O | -0.13456600 | -1.39086600 | 0.14081700  | C | -0.67967500 | -2.24906300 | 4.23004300  |
| N | -2.54050600 | -1.02343000 | -0.14279200 | H | -1.13553900 | -3.23769900 | 4.08913000  |
| N | 3.33618100  | -0.13143700 | -0.40147300 | H | -1.32081600 | -1.67739500 | 4.91148300  |
| C | -2.87878600 | -2.46398300 | 0.10422900  | H | 0.28479700  | -2.39768200 | 4.73301100  |
| C | -2.28254000 | -2.69348000 | 1.52598100  | C | -1.63674500 | 2.05207400  | 0.83883300  |
| H | -1.45922200 | -3.41280900 | 1.46432700  | C | -1.68865800 | 2.66942000  | 2.10168300  |
| H | -3.03024700 | -3.11765000 | 2.20013600  | H | -1.26078800 | 2.15566800  | 2.95864300  |
| C | -1.72388400 | -1.34258000 | 2.02976200  | C | -2.26984500 | 3.93159300  | 2.26235100  |
| C | -1.38908900 | -0.66349100 | 0.63677500  | H | -2.30142700 | 4.38978000  | 3.24928800  |
| C | -0.89680600 | 0.77939000  | 0.63278600  | C | -2.79775400 | 4.60799000  | 1.15633600  |
| C | 0.44162600  | 0.79733600  | 0.39719700  | H | -3.24971300 | 5.59028600  | 1.27963900  |
| H | 1.04539000  | 1.69383500  | 0.41006100  | C | -2.73245400 | 4.01489400  | -0.10907200 |
| C | 0.94497400  | -0.50685400 | 0.09262000  | H | -3.13255100 | 4.53421100  | -0.97801100 |
| C | 2.19604500  | -0.93725800 | -0.26343000 | C | -2.15708500 | 2.75081100  | -0.26678000 |
| C | 2.53892700  | -2.38510400 | -0.65847700 | H | -2.10520400 | 2.29790700  | -1.25167700 |
| C | 4.07726500  | -2.32922400 | -0.81863800 | C | 1.82522200  | -2.73246600 | -1.99899200 |
| H | 4.43426900  | -2.98359000 | -1.61865300 | H | 0.75260000  | -2.59607900 | -1.84301900 |
| H | 4.56031300  | -2.65501800 | 0.10759700  | H | 2.11938500  | -1.99405300 | -2.75100400 |
| C | 4.46055100  | -0.85938900 | -1.08017100 | C | 2.07031900  | -4.13800800 | -2.56281800 |
| C | -3.10964900 | -0.24172100 | -1.20731300 | H | 1.64224300  | -4.91793600 | -1.92274200 |
| C | -4.34713400 | 0.44130700  | -0.98910700 | H | 3.13856000  | -4.35582400 | -2.68971400 |
| C | -4.87435200 | 1.25173100  | -2.00455500 | H | 1.59833500  | -4.22840600 | -3.54961500 |
| H | -5.80732000 | 1.78157600  | -1.82496800 | C | 2.12402300  | -3.43935500 | 0.40458800  |
| C | -4.22340600 | 1.41394700  | -3.22439100 | H | 1.02984500  | -3.48573200 | 0.41998900  |
| H | -4.64342600 | 2.05955100  | -3.99391200 | H | 2.47924300  | -4.41620600 | 0.05062400  |
| C | -3.03042100 | 0.73368700  | -3.44574100 | C | 2.63494900  | -3.22034200 | 1.82991000  |
| H | -2.52175900 | 0.84609900  | -4.40089900 | H | 2.21926800  | -3.98254600 | 2.50129400  |
| C | -2.46468300 | -0.10173900 | -2.46718400 | H | 2.33326200  | -2.24213000 | 2.20922600  |
| C | -5.15524100 | 0.35953500  | 0.30150300  | H | 3.72781800  | -3.28657500 | 1.89896100  |
| H | -4.64020400 | -0.33732900 | 0.95872400  | C | 4.52667000  | -0.56048900 | -2.59190300 |
| C | -6.58222900 | -0.17291400 | 0.05249400  | H | 3.55170100  | -0.66736700 | -3.07379700 |
| H | -7.08227400 | -0.36623400 | 1.01078200  | H | 5.22479100  | -1.25787300 | -3.07143000 |
| H | -6.58036400 | -1.10184500 | -0.52610900 | H | 4.88956300  | 0.45267400  | -2.77393000 |
| H | -7.18619300 | 0.56204500  | -0.49433100 | C | 5.81944600  | -0.51377100 | -0.46268800 |
| C | -5.23971200 | 1.70833300  | 1.04163900  | C | 6.03519700  | 0.55722300  | -0.54914200 |
| H | -5.75223400 | 2.46393500  | 0.43305600  | H | 6.60388000  | -1.06347700 | -0.99601800 |
| H | -4.25111500 | 2.09572700  | 1.29196700  | H | 5.86069400  | -0.79663200 | 0.59160900  |
| H | -5.80879200 | 1.58268200  | 1.97240500  | C | 3.50759300  | 1.18278200  | 0.15523500  |
| C | -1.16831900 | -0.80661900 | -2.83228900 | C | 3.33915500  | 2.35005500  | -0.63682600 |
| H | -0.85851900 | -1.39139600 | -1.96868600 | C | 3.59385500  | 3.60558000  | -0.05962800 |
| C | -1.35323400 | -1.75538200 | -4.03281400 | H | 3.47739400  | 4.49992200  | -0.66766000 |
| H | -2.19108500 | -2.44524900 | -3.88032200 | C | 3.97393000  | 3.73256500  | 1.27337500  |
| H | -0.44322100 | -2.34978600 | -4.18442600 | H | 4.16308700  | 4.71580700  | 1.70034700  |
| H | -1.54486800 | -1.19530700 | -4.95745500 | C | 4.09811800  | 2.58729600  | 2.05768200  |
| C | -0.05163000 | 0.20865600  | -3.12248300 | H | 4.38026100  | 2.68249800  | 3.10394100  |
| H | -0.31424700 | 0.86550700  | -3.96141200 | C | 3.87444400  | 1.31057500  | 1.52339800  |
| H | 0.88063400  | -0.30610200 | -3.37805400 | C | 2.84535300  | 2.33080100  | -2.07647300 |
| H | 0.13387000  | 0.82675600  | -2.24373200 | H | 2.63497800  | 1.29147700  | -2.34056100 |
| C | -4.38311600 | -2.75798500 | 0.05120700  | C | 1.53946000  | 3.14035400  | -2.23258600 |
| H | -4.93921500 | -2.26978800 | 0.85221900  | H | 0.76244400  | 2.80117700  | -1.54155300 |
| H | -4.53156800 | -3.83925700 | 0.15279600  | H | 1.15372600  | 3.03795500  | -3.25400200 |
| H | -4.80770900 | -2.45028200 | -0.91080400 | H | 1.71472200  | 4.20690400  | -2.04524200 |
| C | -2.20788500 | -3.40792200 | -0.91685900 | C | 3.90346100  | 2.89301700  | -3.04921700 |
| H | -2.61212600 | -3.24111400 | -1.92084400 | H | 4.02694800  | 3.97341800  | -2.90093300 |
| H | -2.41516300 | -4.44992000 | -0.63880300 | H | 3.59277300  | 2.72984100  | -4.08907500 |
| H | -1.12766200 | -3.26092000 | -0.93562400 | H | 4.88459900  | 2.42856400  | -2.90490000 |
| C | -2.75051000 | -0.45458000 | 2.79588800  | C | 3.98970300  | 0.11548900  | 2.45474100  |
| H | -3.20025100 | 0.25243400  | 2.09921100  | H | 3.89863500  | -0.78387900 | 1.84310200  |
| H | -2.18628500 | 0.16089500  | 3.50786600  | C | 2.82385900  | 0.12254500  | 3.46155100  |
| C | -3.87883200 | -1.15611200 | 3.56088500  | H | 2.89957600  | 0.98319800  | 4.13901500  |
| H | -3.50598400 | -1.91168300 | 4.26118400  | H | 2.82950800  | -0.79020300 | 4.07083900  |
| H | -4.58703800 | -1.65284800 | 2.88788300  | H | 1.86633600  | 0.18305700  | 2.93813600  |
| H | -4.44723400 | -0.41573400 | 4.13881800  | C | 5.33779100  | 0.05597000  | 3.19745600  |
| C | -0.46737500 | -1.53178600 | 2.89208600  | H | 6.18638300  | 0.11869900  | 2.50710800  |
| H | -0.03796100 | -0.53996000 | 3.08218300  | H | 5.41602900  | -0.88693000 | 3.75381900  |
| H | 0.26579300  | -2.08420300 | 2.30464300  | H | 5.43315700  | 0.87565600  | 3.92051900  |

M06/6-311g(d,p) with PCM model for acetonitrile  
(E = -2247.815622)

|   | x           | y           | z           |   | x           | y           | z           |
|---|-------------|-------------|-------------|---|-------------|-------------|-------------|
| O | -0.14786000 | -1.32611400 | 0.23596200  | C | -0.65708200 | -1.92870000 | 4.34649200  |
| N | -2.51793100 | -1.00610000 | -0.05862700 | H | -1.11329800 | -2.92236100 | 4.26113100  |
| N | 3.33075200  | -0.18532800 | -0.39140800 | H | -1.29611200 | -1.32399500 | 4.99894700  |
| C | -2.85371400 | -2.41210400 | 0.30533000  | H | 0.30247300  | -2.05519400 | 4.86087400  |
| C | -2.24720700 | -2.53153600 | 1.72290400  | C | -1.58830500 | 2.14112100  | 0.70763000  |
| H | -1.42331500 | -3.25569700 | 1.71069700  | C | -1.61382800 | 2.84524800  | 1.91275200  |
| H | -2.98416200 | -2.91316300 | 2.43544900  | H | -1.18642700 | 2.38818000  | 2.80201400  |
| C | -1.68824100 | -1.15554300 | 2.11625800  | C | -2.16025200 | 4.11981300  | 1.98358200  |
| C | -1.35349200 | -0.59294200 | 0.68449600  | H | -2.16866600 | 4.65000400  | 2.93139000  |
| C | -0.87179900 | 0.84850700  | 0.57989300  | C | -2.68084700 | 4.71996500  | 0.84414500  |
| C | 0.44711700  | 0.85147900  | 0.32254700  | H | -3.10602200 | 5.71764400  | 0.89814900  |
| H | 1.04602600  | 1.75241300  | 0.26429300  | C | -2.63911500 | 4.04133800  | -0.36619700 |
| C | 0.94009400  | -0.47653300 | 0.11073800  | H | -3.02939000 | 4.50617400  | -1.26745600 |
| C | 2.17318500  | -0.94878000 | -0.20254700 | C | -2.09511200 | 2.76631400  | -0.43348400 |
| C | 2.48988000  | -2.42127500 | -0.47184100 | H | -2.05174200 | 2.24325800  | -1.38577900 |
| C | 4.01473800  | -2.40847400 | -0.66017500 | C | 1.77042400  | -2.87053200 | -1.76297600 |
| H | 4.33955600  | -3.11872500 | -1.42799200 | H | 0.70637100  | -2.64132400 | -1.65387900 |
| H | 4.51263600  | -2.69925300 | 0.27100600  | H | 2.12522600  | -2.24735400 | -2.59284000 |
| C | 4.42792300  | -0.97831100 | -1.01205900 | C | 1.92246800  | -4.33457800 | -2.14374800 |
| C | -3.11157300 | -0.31438800 | -1.16794200 | H | 1.38321800  | -4.99626300 | -1.45835700 |
| C | -4.33307700 | 0.38737600  | -0.98427900 | H | 2.97013200  | -4.65695600 | -2.16186500 |
| C | -4.88624400 | 1.09130400  | -2.05091000 | H | 1.51321400  | -4.50631300 | -3.14475400 |
| H | -5.81385500 | 1.63742800  | -1.89760000 | C | 2.09523100  | -3.37004000 | 0.67696800  |
| C | -4.28198500 | 1.12215200  | -3.29362200 | H | 1.00102800  | -3.43890400 | 0.70823900  |
| H | -4.72781500 | 1.68266600  | -4.11025400 | H | 2.45810500  | -4.37165800 | 0.40851500  |
| C | -3.11003800 | 0.41747200  | -3.48371000 | C | 2.61706800  | -3.03198700 | 2.06300200  |
| H | -2.64090600 | 0.42015900  | -4.46441200 | H | 2.20030500  | -3.72495600 | 2.80250900  |
| C | -2.51680600 | -0.30828000 | -2.45023200 | H | 2.33446200  | -2.02035800 | 2.36690600  |
| C | -5.11365000 | 0.42090100  | 0.31542700  | H | 3.70843700  | -3.10663100 | 2.13380900  |
| H | -4.58752000 | -0.21506300 | 1.02506900  | C | 4.51938200  | -0.78812600 | -2.52716700 |
| C | -6.53015900 | -0.12819800 | 0.14457800  | H | 3.55703700  | -0.93065900 | -3.02571500 |
| H | -7.00029100 | -0.26361000 | 1.12652200  | H | 5.22606400  | -1.51565100 | -2.94272600 |
| H | -6.54523100 | -1.09170500 | -0.37288600 | H | 4.89028000  | 0.20782100  | -2.77921500 |
| H | -7.15904800 | 0.56519400  | -0.42607000 | C | 5.78547600  | -0.63943200 | -0.41921300 |
| C | -5.19196200 | 1.81415900  | 0.93295000  | H | 6.05229300  | 0.41032300  | -0.58828900 |
| H | -5.70399800 | 2.52034000  | 0.26762100  | H | 6.54858300  | -1.25906200 | -0.90262800 |
| H | -4.20214400 | 2.22144800  | 1.15208000  | H | 5.81955300  | -0.84313800 | 0.65406100  |
| H | -5.76019400 | 1.77153400  | 1.87069500  | C | 3.50914200  | 1.16882400  | 0.03795900  |
| C | -1.25027000 | -1.06105400 | -2.78669600 | C | 3.34068500  | 2.25158300  | -0.85077300 |
| H | -0.92047000 | -1.56535500 | -1.87868300 | C | 3.57268300  | 3.54763700  | -0.39047400 |
| C | -1.48349300 | -2.11274900 | -3.86874000 | H | 3.45205000  | 4.38248400  | -1.07578400 |
| H | -2.34141100 | -2.75441000 | -3.64291800 | C | 3.93352200  | 3.79589500  | 0.91998500  |
| H | -0.59785000 | -2.75314300 | -3.96806500 | H | 4.10408200  | 4.81343200  | 1.25887000  |
| H | -1.66545000 | -1.64887700 | -4.84594300 | C | 4.06402900  | 2.73520000  | 1.79784000  |
| C | -0.13386200 | -0.11544800 | -3.21431600 | H | 4.33369500  | 2.92974400  | 2.83281600  |
| H | -0.41626000 | 0.47335900  | -4.09596500 | C | 3.86270700  | 1.42227200  | 1.38196600  |
| H | 0.77069800  | -0.68016400 | -3.47086200 | C | 2.86446000  | 2.09989800  | -2.27860700 |
| H | 0.11920300  | 0.57645300  | -2.40726800 | H | 2.67361800  | 1.03557200  | -2.45382500 |
| C | -4.34750900 | -2.71132200 | 0.29589500  | C | 1.55910000  | 2.85844400  | -2.52297500 |
| H | -4.90897800 | -2.15305500 | 1.04617300  | H | 0.77200000  | 2.57145100  | -1.81761600 |
| H | -4.48959800 | -3.77661000 | 0.50660000  | H | 1.19154300  | 2.65620900  | -3.53544500 |
| H | -4.78398300 | -2.51098500 | -0.68915500 | H | 1.70624400  | 3.94099200  | -2.43687600 |
| C | -2.21597000 | -3.44632100 | -0.62884300 | C | 3.91454700  | 2.58625400  | -3.27725600 |
| H | -2.64307700 | -3.38321400 | -1.63574600 | H | 4.00316700  | 3.67855400  | -3.24556400 |
| H | -2.42528700 | -4.45264400 | -0.24599400 | H | 3.63348000  | 2.30804500  | -4.29922700 |
| H | -1.13347500 | -3.32504900 | -0.69088600 | H | 4.90806200  | 2.17525500  | -3.07184500 |
| C | -2.69767900 | -0.21692100 | 2.82222600  | C | 3.98869000  | 0.33026200  | 2.41808000  |
| H | -3.12837300 | 0.47052200  | 2.09168900  | H | 3.86274000  | -0.62613100 | 1.90322800  |
| H | -2.12850900 | 0.42390900  | 3.50926200  | C | 2.87880700  | 0.45514000  | 3.45951700  |
| C | -3.83878600 | -0.84407800 | 3.60786300  | H | 3.01092000  | 1.35928300  | 4.06565300  |
| H | -3.49365800 | -1.55308700 | 4.36780600  | H | 2.88606100  | -0.40529200 | 4.14011300  |
| H | -4.54619500 | -1.37941600 | 2.96468200  | H | 1.89354400  | 0.50980400  | 2.98566400  |
| H | -4.40603900 | -0.06120400 | 4.12324900  | C | 5.34798600  | 0.31832200  | 3.11241500  |
| C | -0.44223200 | -1.28880600 | 2.98545400  | H | 6.17795500  | 0.29620100  | 2.39903600  |
| H | -0.01164900 | -0.28721800 | 3.12630300  | H | 5.43078300  | -0.56401300 | 3.75765200  |
| H | 0.29646500  | -1.87220600 | 2.43467000  | H | 5.48191400  | 1.20058900  | 3.74880700  |

M06-2X/6-31g(d,p) with PCM model for acetonitrile  
(E = -2248.550152)

|   | x           | y           | z           |   | x           | y           | z           |
|---|-------------|-------------|-------------|---|-------------|-------------|-------------|
| O | -0.14743200 | -1.34867100 | 0.12072400  | C | -0.68174000 | -2.31536400 | 4.16951700  |
| N | -2.52026900 | -1.00209300 | -0.14961300 | H | -1.17419500 | -3.27876100 | 4.00778900  |
| N | 3.32166300  | -0.13038100 | -0.42580500 | H | -1.30342400 | -1.72848000 | 4.84962800  |
| C | -2.83684600 | -2.44307500 | 0.05056900  | H | 0.26827400  | -2.50793700 | 4.67408400  |
| C | -2.24787400 | -2.70721200 | 1.46369200  | C | -1.64686400 | 2.04666800  | 0.90460500  |
| H | -1.42231200 | -3.42036600 | 1.38470100  | C | -1.72600000 | 2.61719500  | 2.17861300  |
| H | -2.99356200 | -3.14905600 | 2.12552000  | H | -1.29222700 | 2.09188800  | 3.02161400  |
| C | -1.69120000 | -1.36934400 | 1.99746200  | C | -2.34107200 | 3.85032000  | 2.37180900  |
| C | -1.35380200 | -0.66688900 | 0.62932500  | H | -2.39470500 | 4.27435600  | 3.36777800  |
| C | -0.88438300 | 0.78839800  | 0.66890700  | C | -2.87409400 | 4.54226100  | 1.28787500  |
| C | 0.43730500  | 0.82677500  | 0.43272900  | H | -3.35159600 | 5.50375300  | 1.43666800  |
| H | 1.03482300  | 1.72577900  | 0.46561600  | C | -2.77698200 | 3.99808700  | 0.01120500  |
| C | 0.94044600  | -0.48106500 | 0.08726000  | H | -3.17666700 | 4.53456100  | -0.84192900 |
| C | 2.16707600  | -0.90956700 | -0.29687600 | C | -2.16642700 | 2.76228500  | -0.18017100 |
| C | 2.47844000  | -2.35484000 | -0.71541700 | H | -2.08909400 | 2.34655200  | -1.17944400 |
| C | 4.00651300  | -2.31875700 | -0.92145700 | C | 1.73856700  | -2.69004000 | -2.03425800 |
| H | 4.32200800  | -2.94956300 | -1.75481600 | H | 0.68439100  | -2.45236800 | -1.89611300 |
| H | 4.51536600  | -2.68100300 | -0.02558100 | H | 2.10452200  | -2.02942300 | -2.82228400 |
| C | 4.40332100  | -0.85126900 | -1.14900600 | C | 1.85889900  | -4.13901000 | -2.51076600 |
| C | -3.09876500 | -0.20507200 | -1.19468900 | H | 1.30925000  | -4.82441300 | -1.86280600 |
| C | -4.33766900 | 0.44945400  | -0.95829800 | H | 2.89838300  | -4.47603100 | -2.55218300 |
| C | -4.87640900 | 1.27383000  | -1.94593300 | H | 1.44216000  | -4.23414500 | -3.51604400 |
| H | -5.81472400 | 1.78299400  | -1.75339300 | C | 2.08293600  | -3.40015500 | 0.35270200  |
| C | -4.23460600 | 1.47151900  | -3.15877600 | H | 0.99023800  | -3.45533400 | 0.38425900  |
| H | -4.66425700 | 2.12678500  | -3.90791400 | H | 2.44064800  | -4.37344300 | 0.00303700  |
| C | -3.04234300 | 0.81145000  | -3.40217900 | C | 2.61702000  | -3.16545900 | 1.76327900  |
| H | -2.54170600 | 0.94924600  | -4.35474000 | H | 2.19527200  | -3.90317400 | 2.45096100  |
| C | -2.46763400 | -0.03303700 | -2.44768500 | H | 2.34098500  | -2.17638000 | 2.12638200  |
| C | -5.13786900 | 0.31990700  | 0.32940200  | H | 3.70489400  | -3.25609400 | 1.81792400  |
| H | -4.61314100 | -0.38017400 | 0.96985400  | C | 4.43307300  | -0.49974700 | -2.64391100 |
| C | -6.55020200 | -0.22380900 | 0.06634600  | H | 3.44540500  | -0.56668300 | -3.10051100 |
| H | -7.04356300 | -0.45032300 | 1.01592100  | H | 5.10490200  | -1.18364600 | -3.16910400 |
| H | -6.53772300 | -1.13135000 | -0.53833700 | H | 4.80631500  | 0.51268600  | -2.79105900 |
| H | -7.16156300 | 0.51839000  | -0.45373300 | C | 5.78440300  | -0.55359000 | -0.56840900 |
| C | -5.25087000 | 1.64599500  | 1.09305000  | H | 6.02948800  | 0.50844100  | -0.65098700 |
| H | -5.77309600 | 2.39989400  | 0.49675600  | H | 6.53202000  | -1.11805500 | -1.13074000 |
| H | -4.27458800 | 2.04892300  | 1.36092600  | H | 5.85151500  | -0.85063900 | 0.47838900  |
| H | -5.82384200 | 1.48943900  | 2.01197400  | C | 3.52887200  | 1.16480500  | 0.15238900  |
| C | -1.16341400 | -0.71020700 | -2.81768700 | C | 3.32877700  | 2.34735800  | -0.59308400 |
| H | -0.86479200 | -1.31230800 | -1.96642900 | C | 3.61138500  | 3.57940300  | 0.00327200  |
| C | -1.31382500 | -1.61791200 | -4.04504400 | H | 3.46958300  | 4.48955500  | -0.56895800 |
| H | -2.14211800 | -2.32084400 | -3.93936300 | C | 4.05595900  | 3.66584500  | 1.31224200  |
| H | -0.39394300 | -2.19122100 | -4.19651000 | H | 4.26516100  | 4.63213300  | 1.75647300  |
| H | -1.48981600 | -1.02845900 | -4.94960400 | C | 4.21989600  | 2.50421400  | 2.05122900  |
| C | -0.06150400 | 0.32274300  | -3.07277100 | H | 4.55299300  | 2.56934400  | 3.08112700  |
| H | -0.31430900 | 0.96604700  | -3.92130100 | C | 3.96767900  | 1.25103400  | 1.49329900  |
| H | 0.88476000  | -0.17662100 | -3.29799400 | C | 2.78184300  | 2.36860600  | -2.00993200 |
| H | 0.08641500  | 0.95025500  | -2.19490700 | H | 2.54527600  | 1.34130100  | -2.29207800 |
| C | -4.33248900 | -2.75577000 | -0.02454000 | C | 1.49433700  | 3.20414200  | -2.10531800 |
| H | -4.90594600 | -2.31222900 | 0.78674100  | H | 0.72990300  | 2.87386500  | -1.40000500 |
| H | -4.46248500 | -3.83871200 | 0.03255700  | H | 1.07757100  | 3.12914000  | -3.11303200 |
| H | -4.75081000 | -2.41909300 | -0.97687400 | H | 1.70185000  | 4.25866500  | -1.90730900 |
| C | -2.15265100 | -3.34965300 | -0.98727400 | C | 3.80796400  | 2.95016200  | -2.99628700 |
| H | -2.53388100 | -3.13964700 | -1.98969500 | H | 3.90635400  | 4.02882400  | -2.84496100 |
| H | -2.37541600 | -4.39510100 | -0.75484200 | H | 3.48127400  | 2.78642300  | -4.02640000 |
| H | -1.07183800 | -3.21661200 | -0.97624900 | H | 4.79955700  | 2.51365900  | -2.87272700 |
| C | -2.70870500 | -0.50751700 | 2.79207100  | C | 4.12689800  | 0.03112700  | 2.38036800  |
| H | -3.15197600 | 0.23528100  | 2.13038500  | H | 4.04975900  | -0.85269400 | 1.74710000  |
| H | -2.14576000 | 0.06497500  | 3.53619200  | C | 2.98267800  | -0.01142600 | 3.40031200  |
| C | -3.83846400 | -1.24120200 | 3.51624900  | H | 3.04080400  | 0.84670300  | 4.07633500  |
| H | -3.46708900 | -2.04343200 | 4.15731800  | H | 3.03009100  | -0.92361200 | 4.00225400  |
| H | -4.55327000 | -1.68328800 | 2.81820400  | H | 2.01811800  | 0.01848700  | 2.89024500  |
| H | -4.39059700 | -0.53831700 | 4.14477000  | C | 5.47997600  | -0.01184200 | 3.10027900  |
| C | -0.43745800 | -1.58994400 | 2.84701200  | H | 6.31316400  | 0.12189200  | 2.40726000  |
| H | 0.01401200  | -0.61254400 | 3.05085800  | H | 5.60100800  | -0.97516600 | 3.60239400  |
| H | 0.27797700  | -2.15874800 | 2.25563300  | H | 5.55063000  | 0.76709000  | 3.86364400  |

# NMR spectra

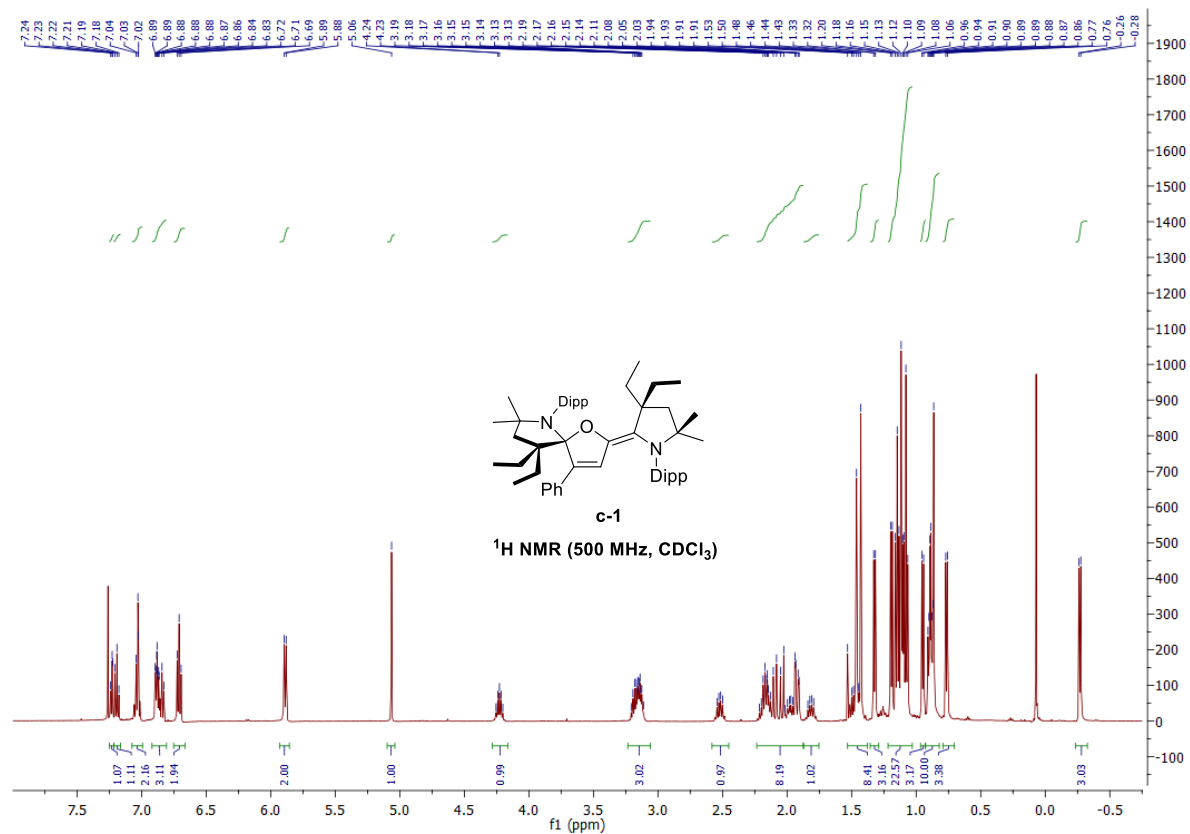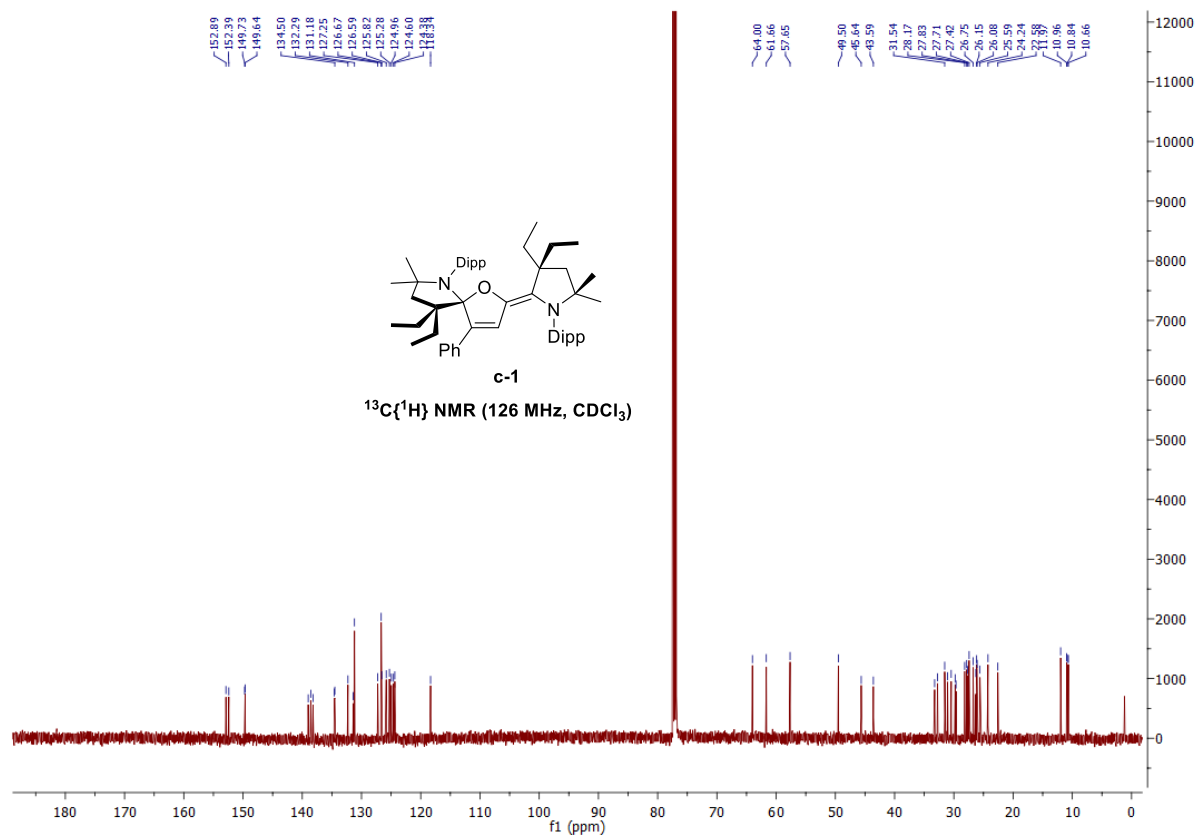

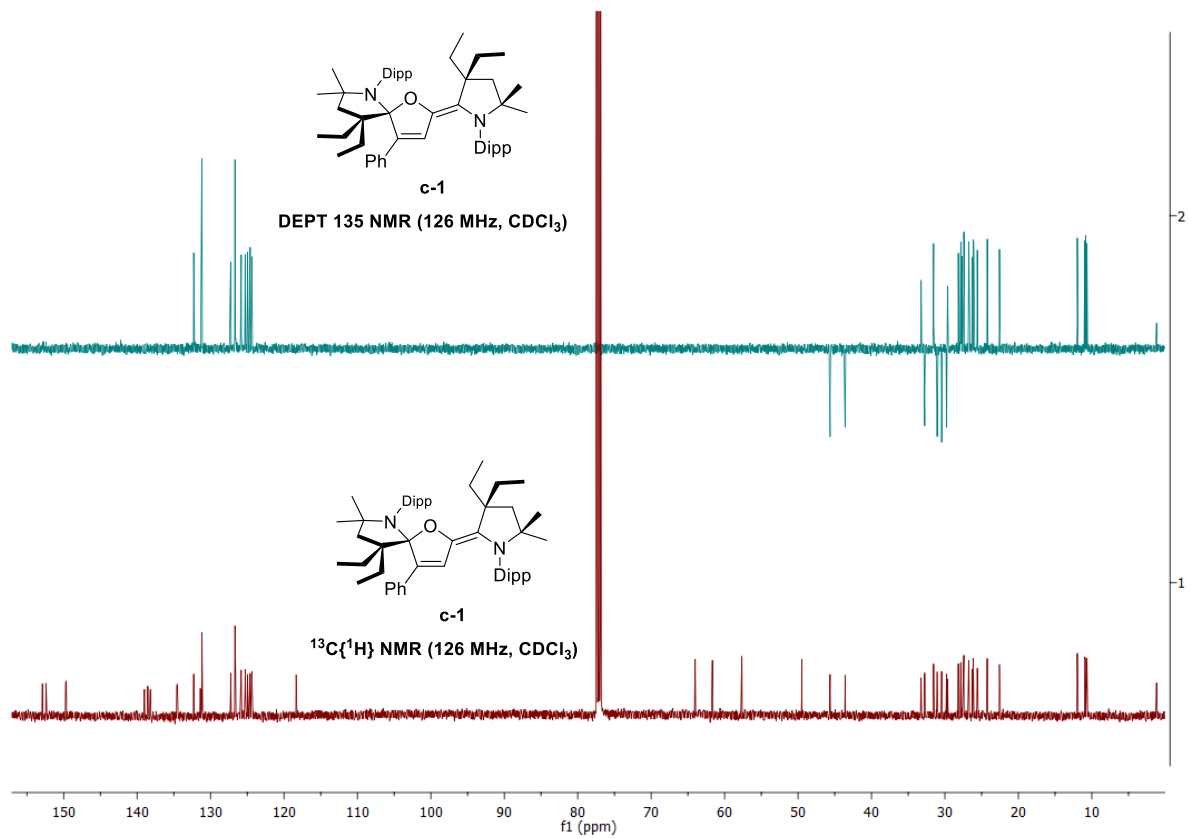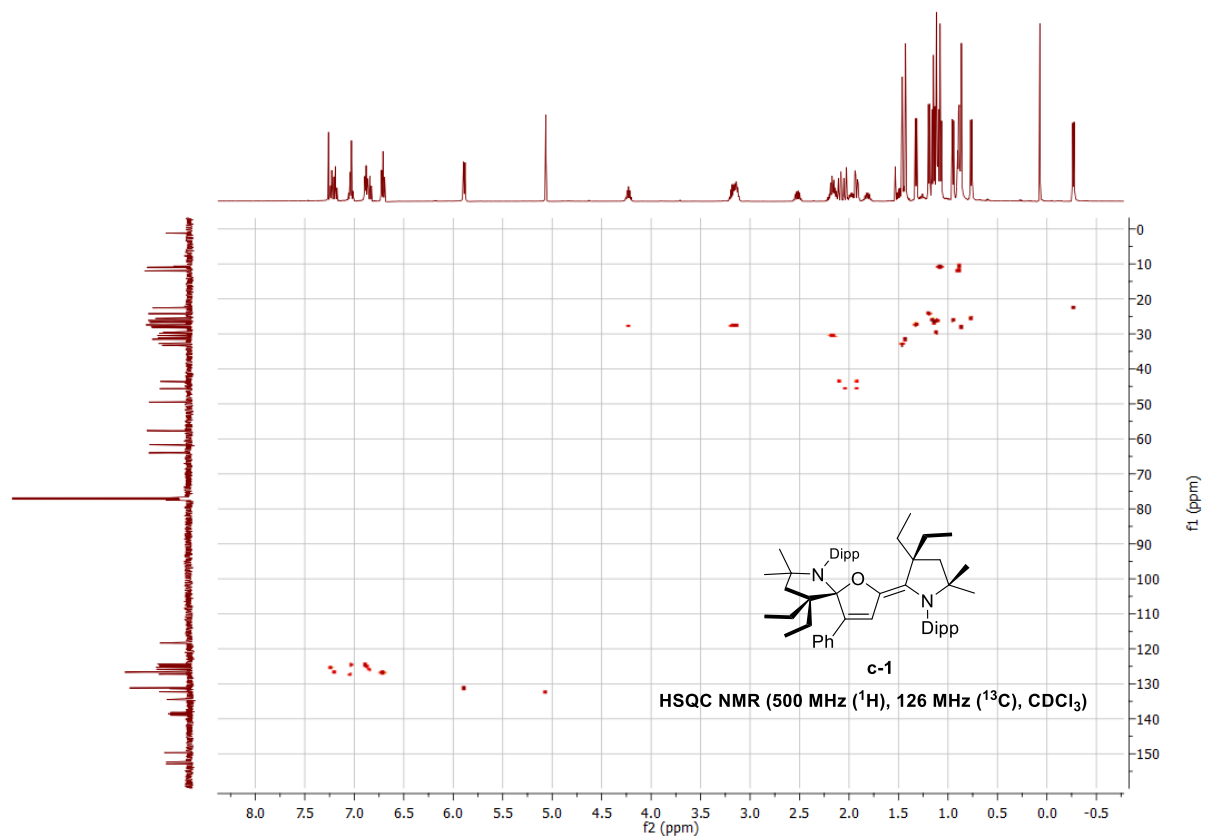

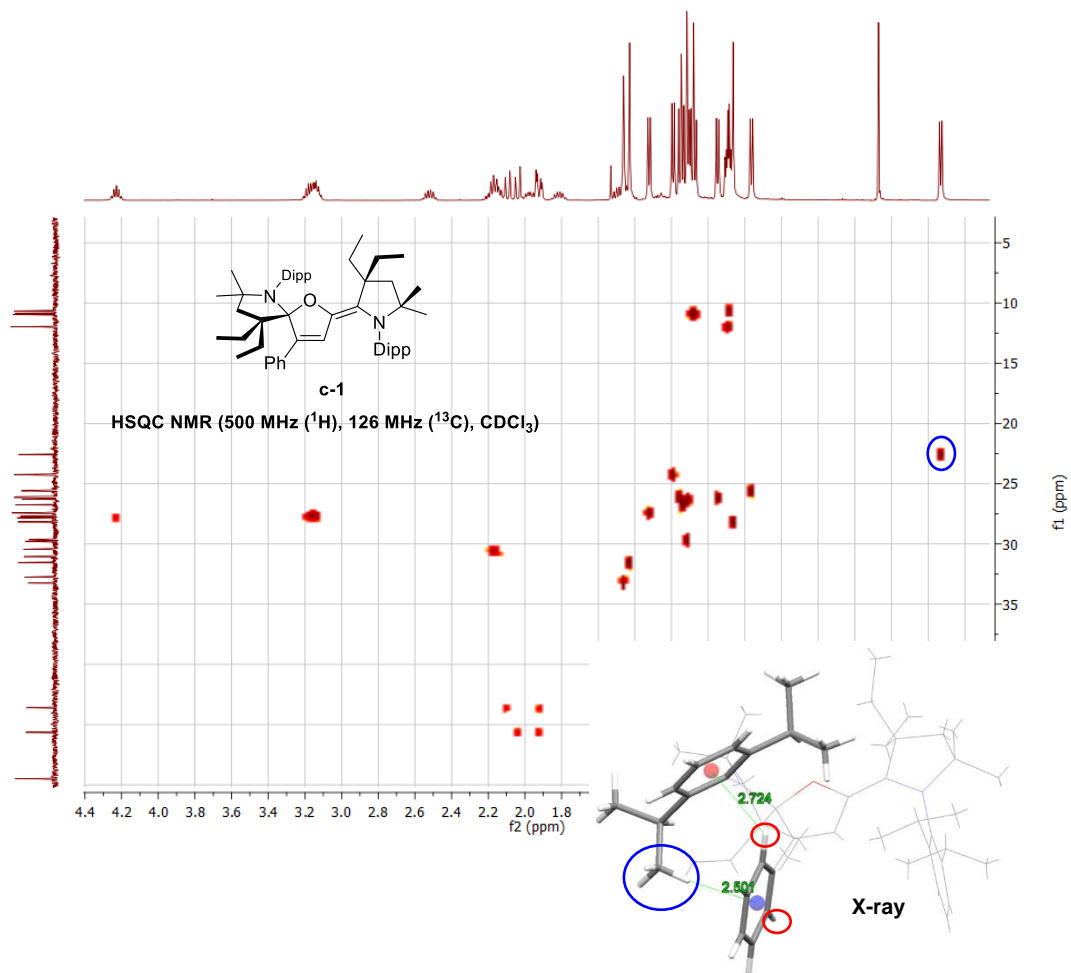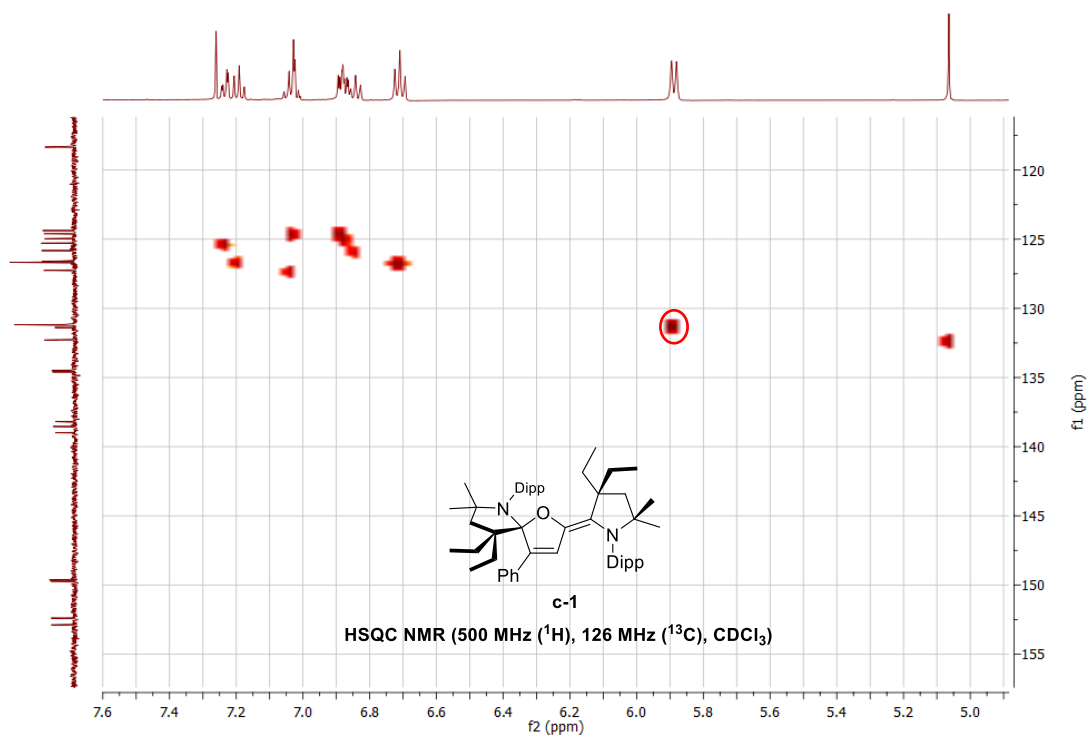

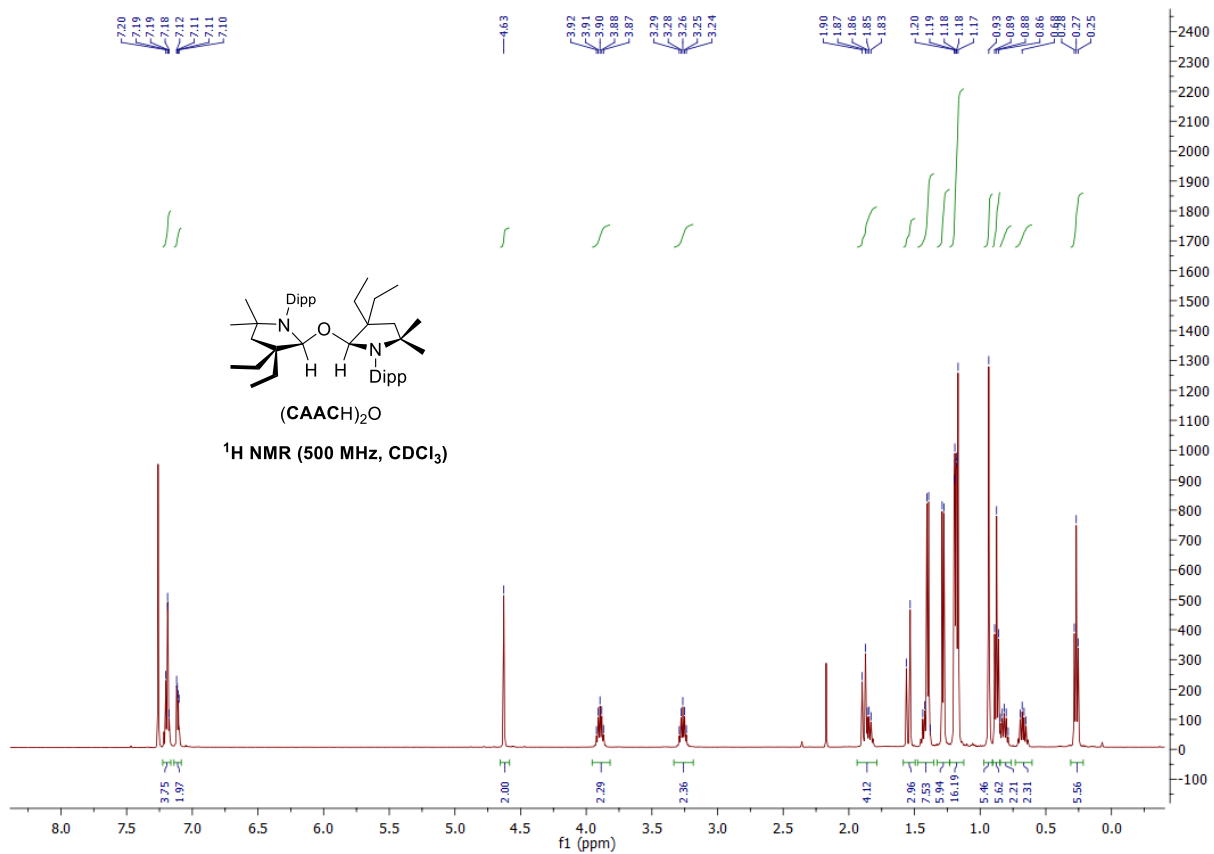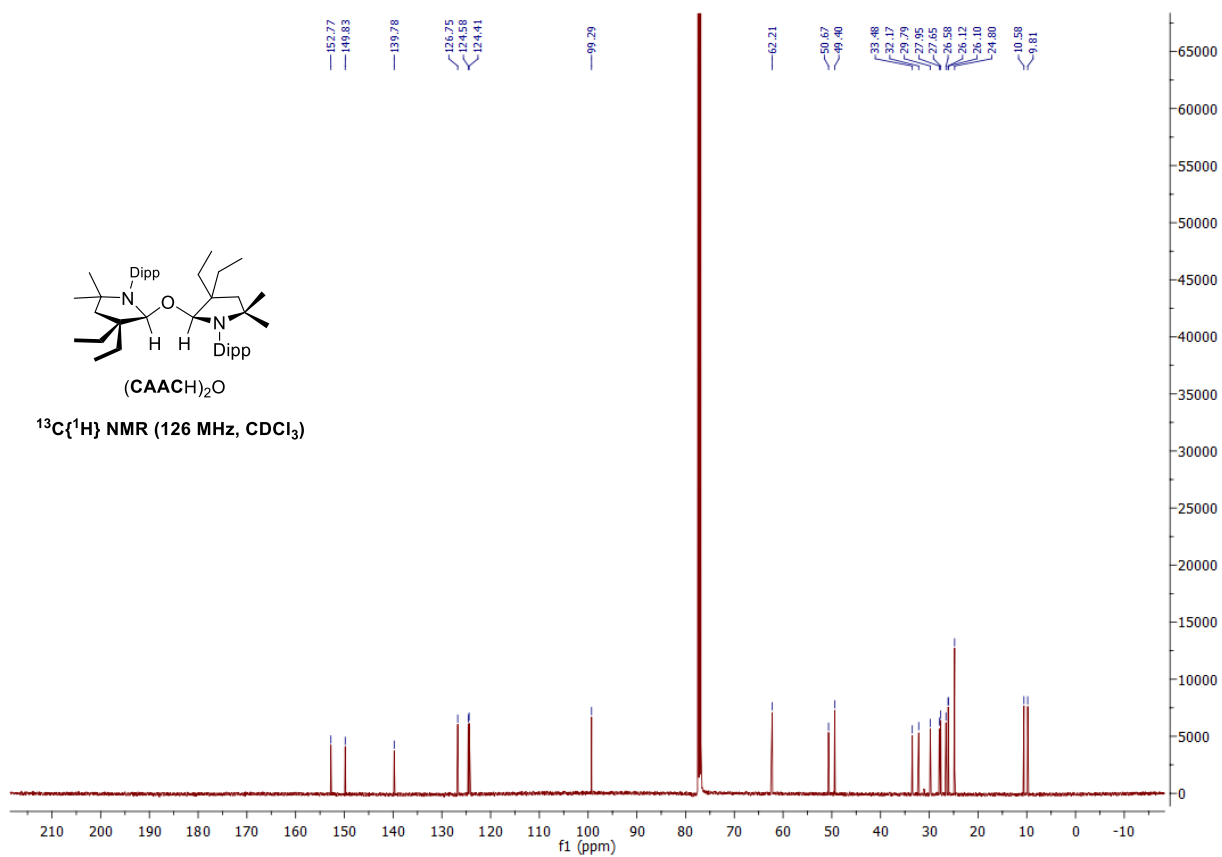

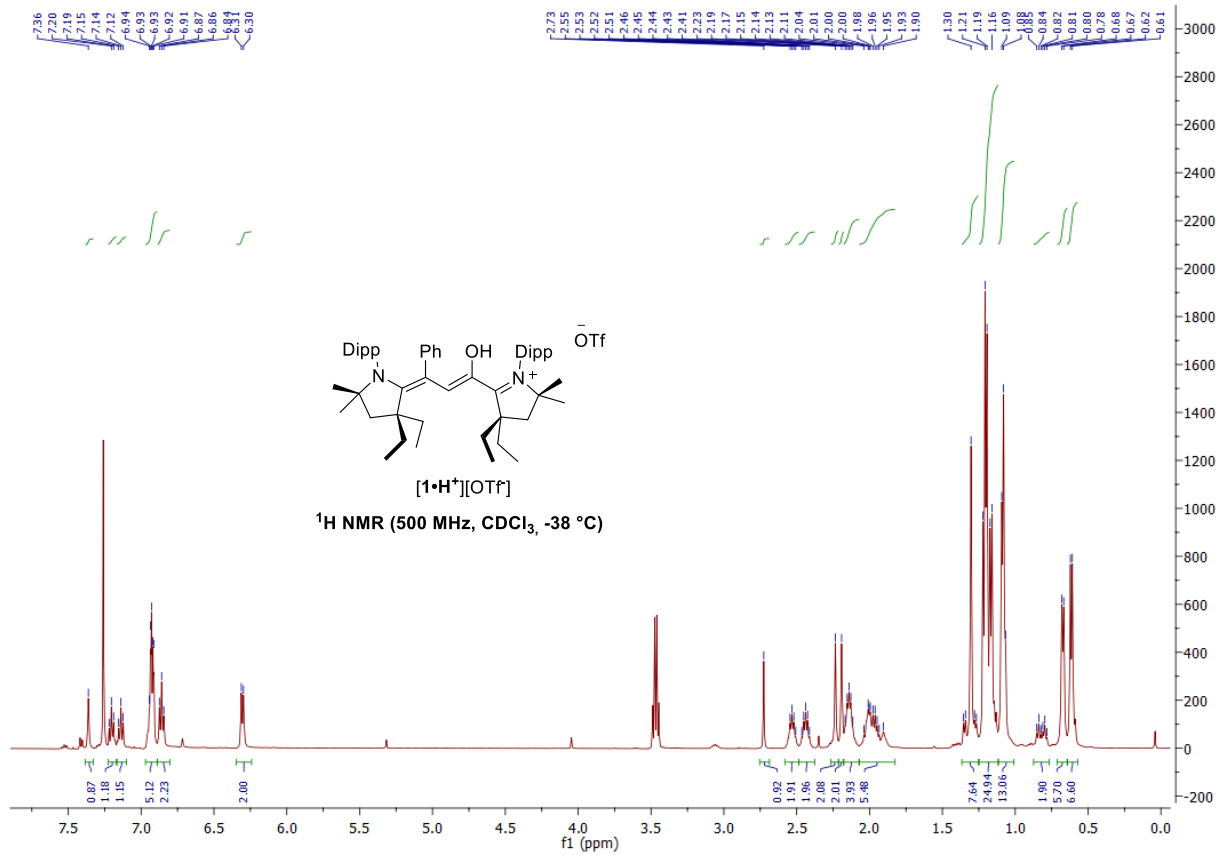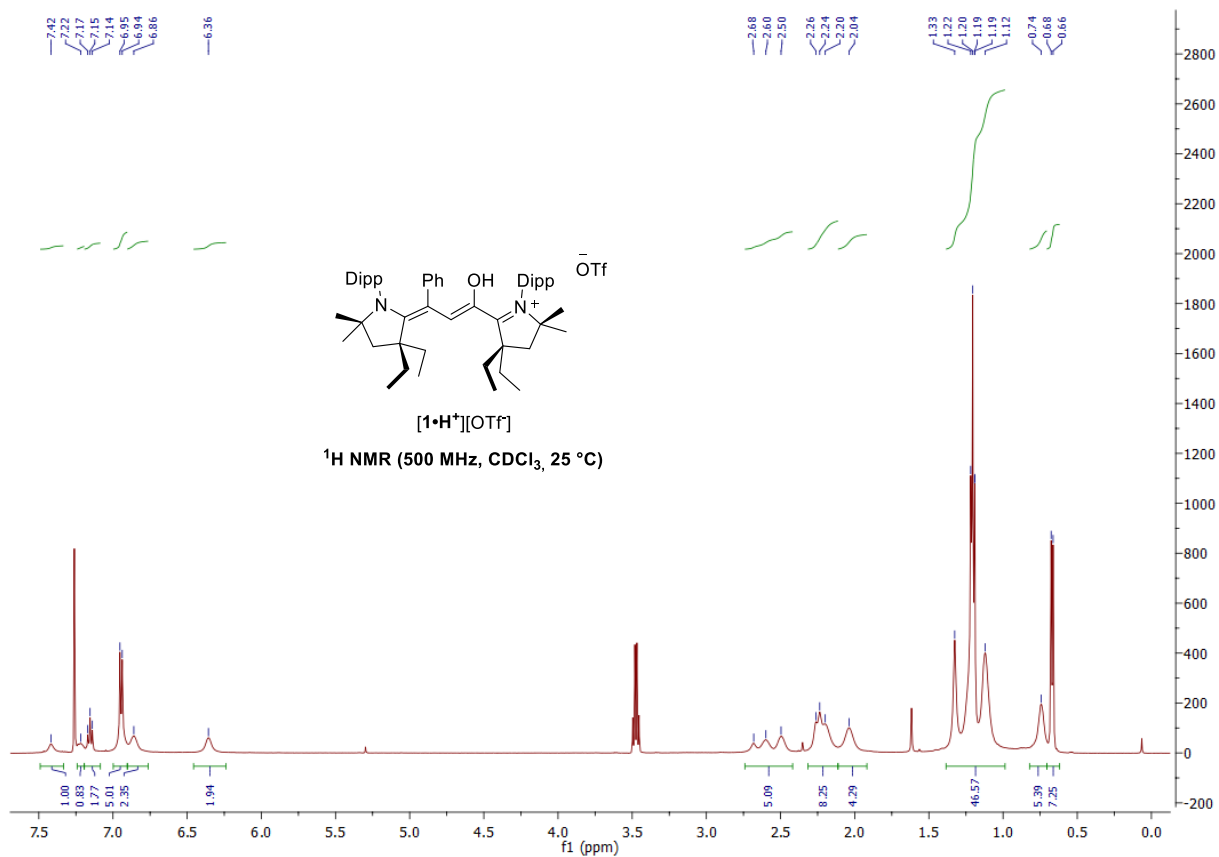



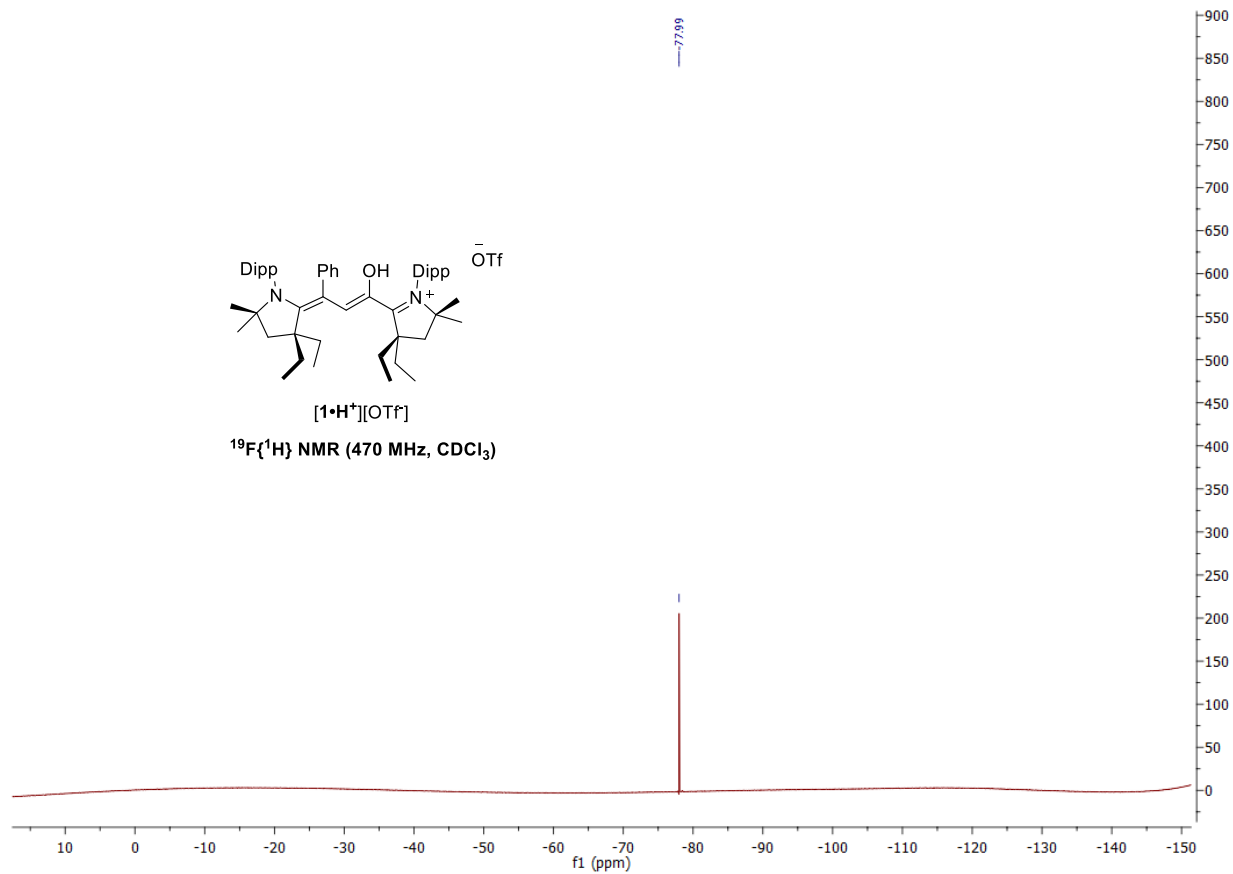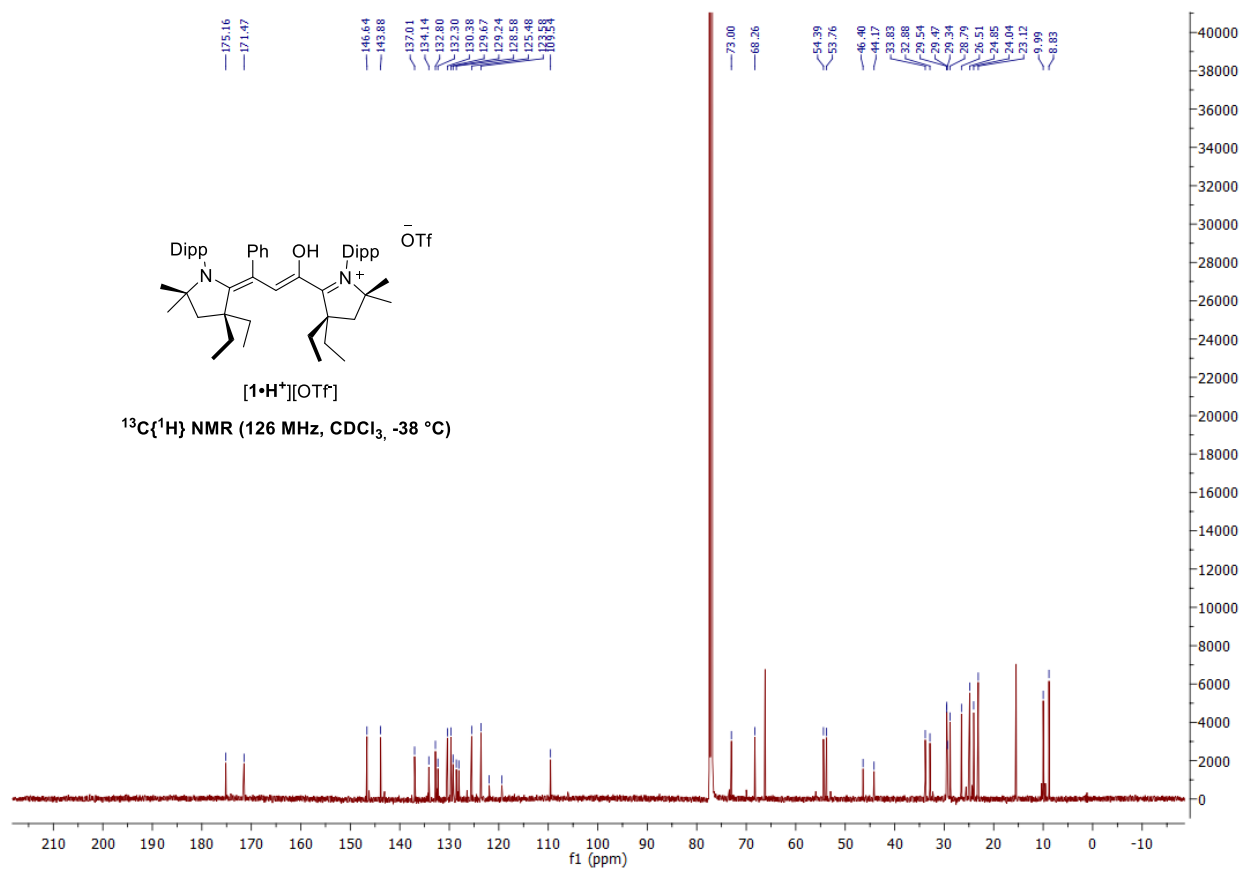

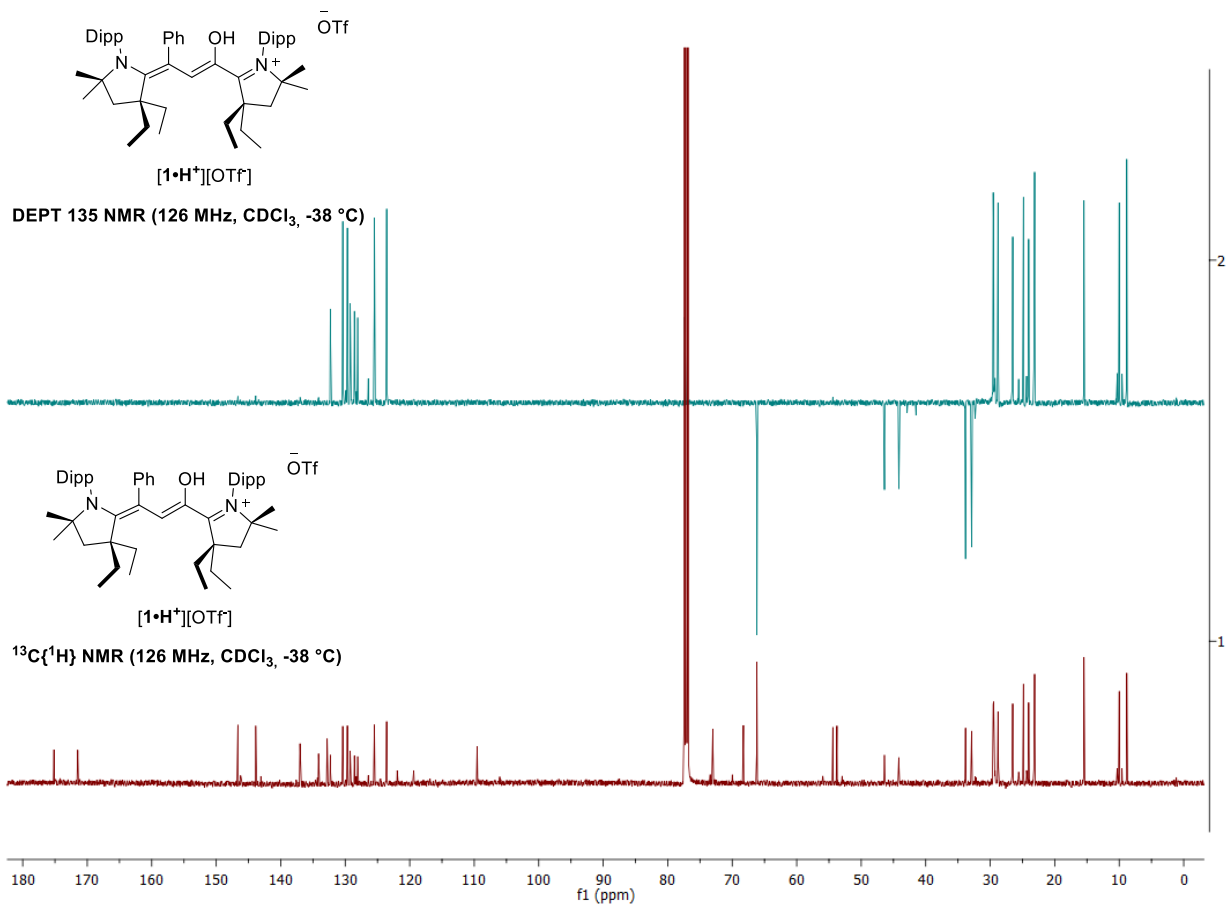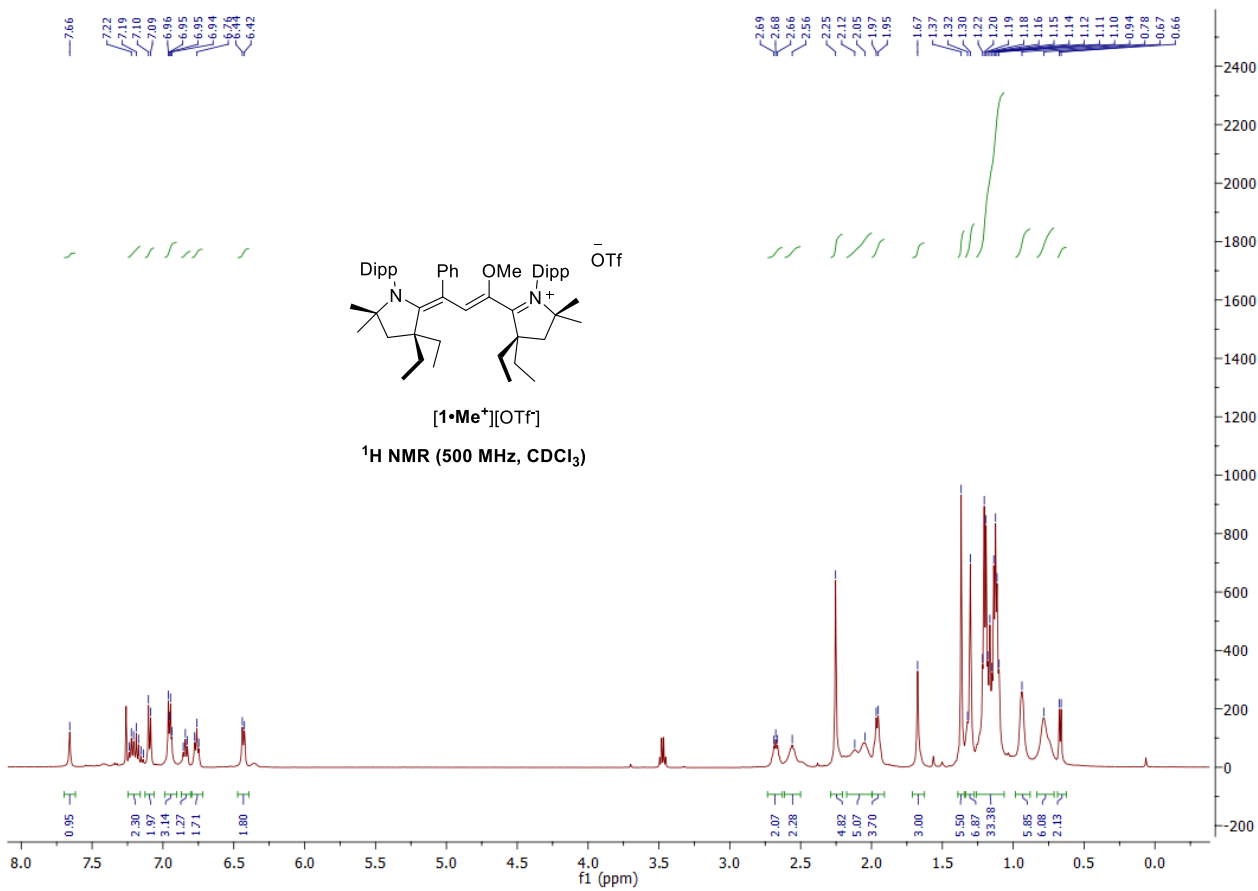

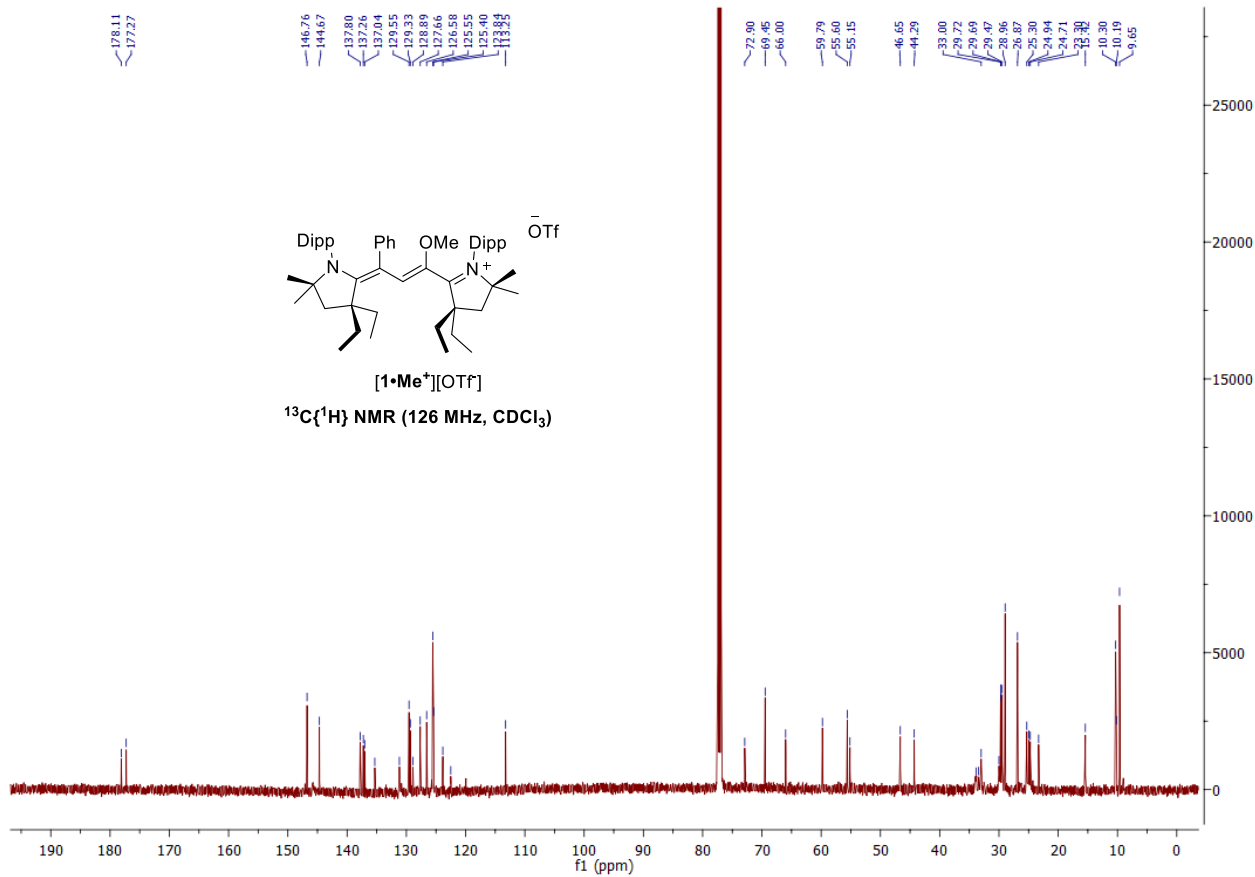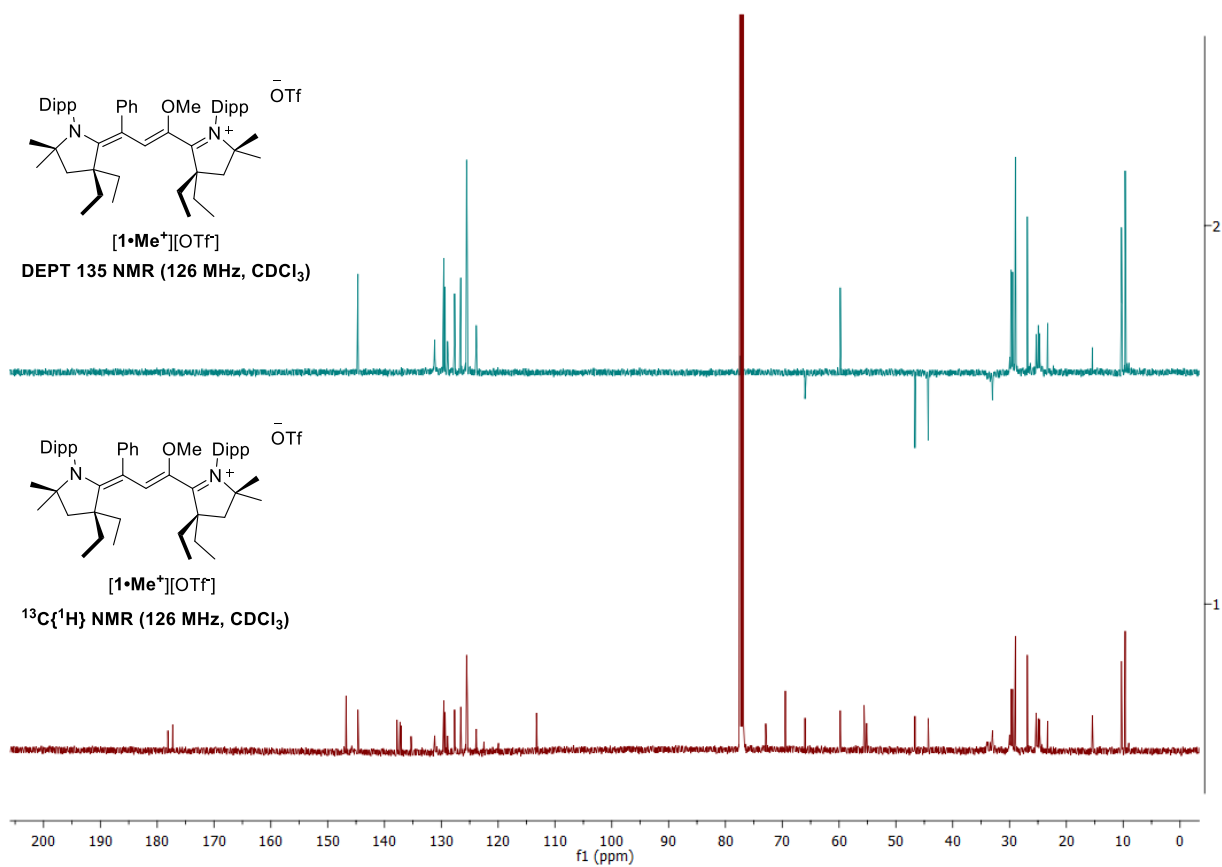

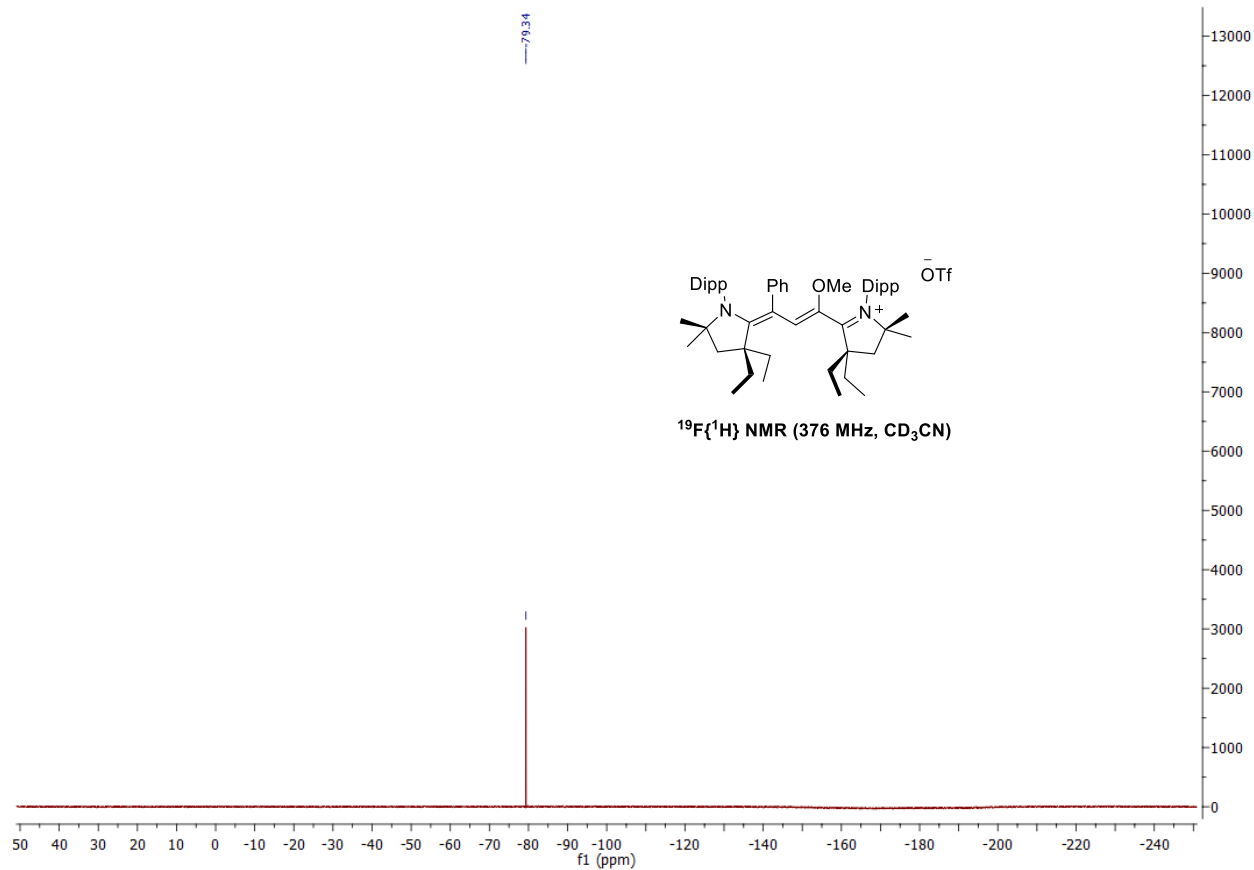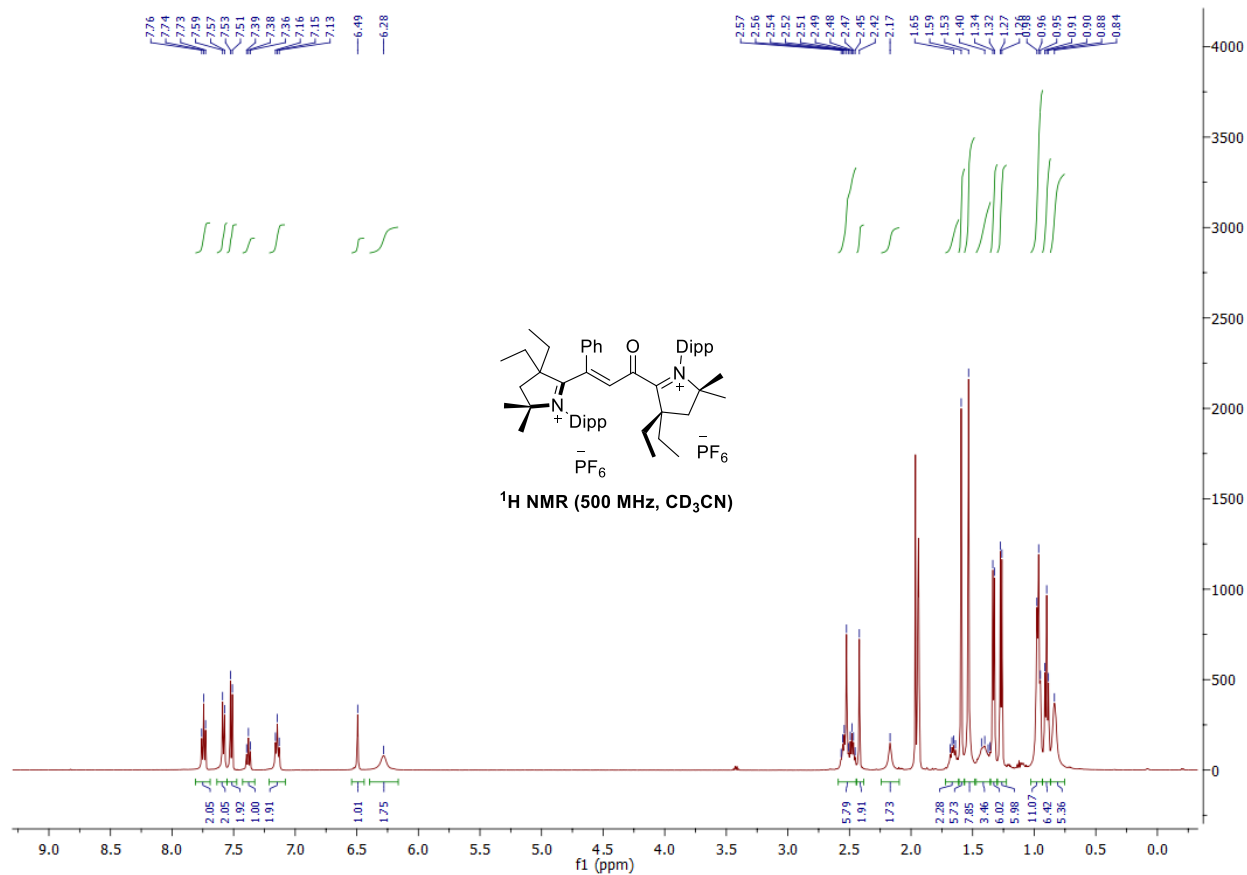

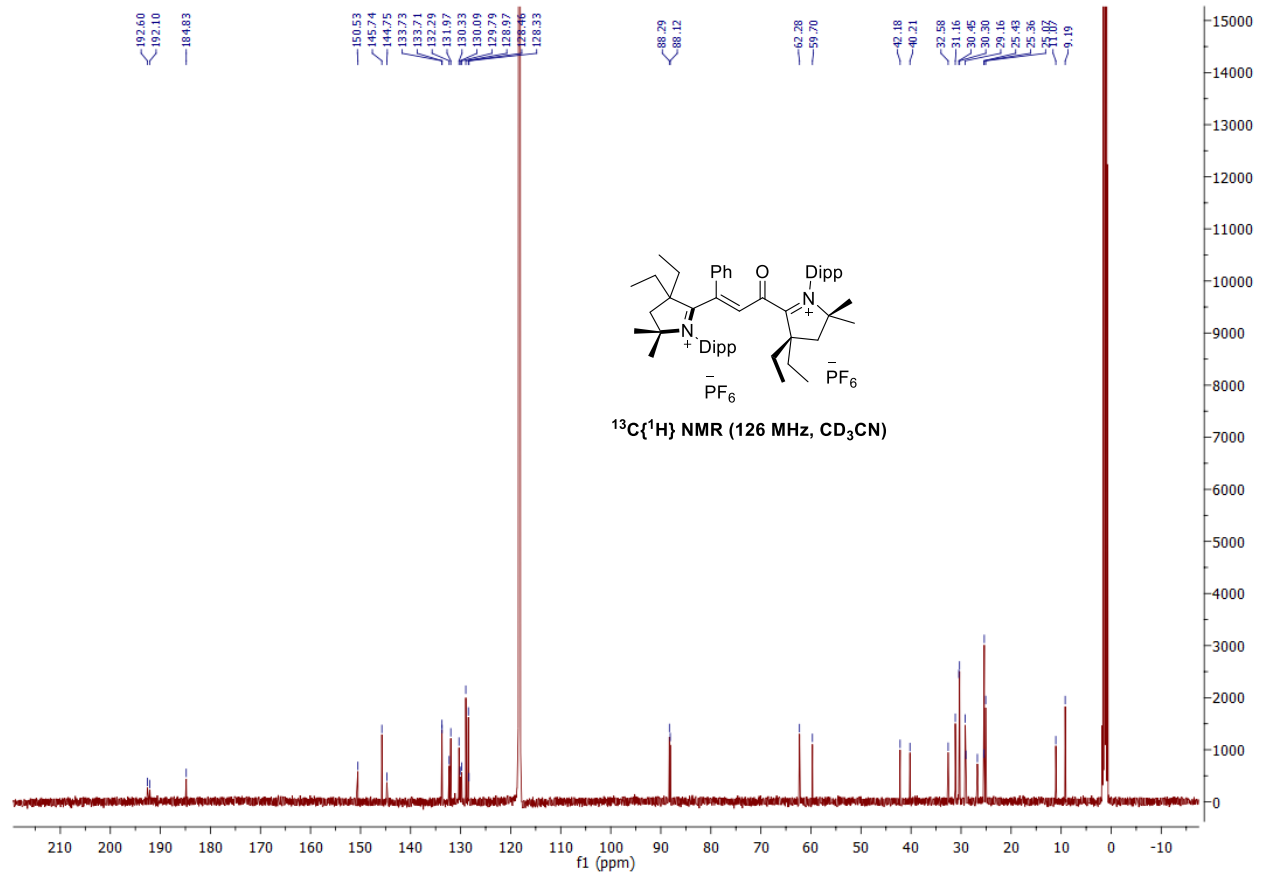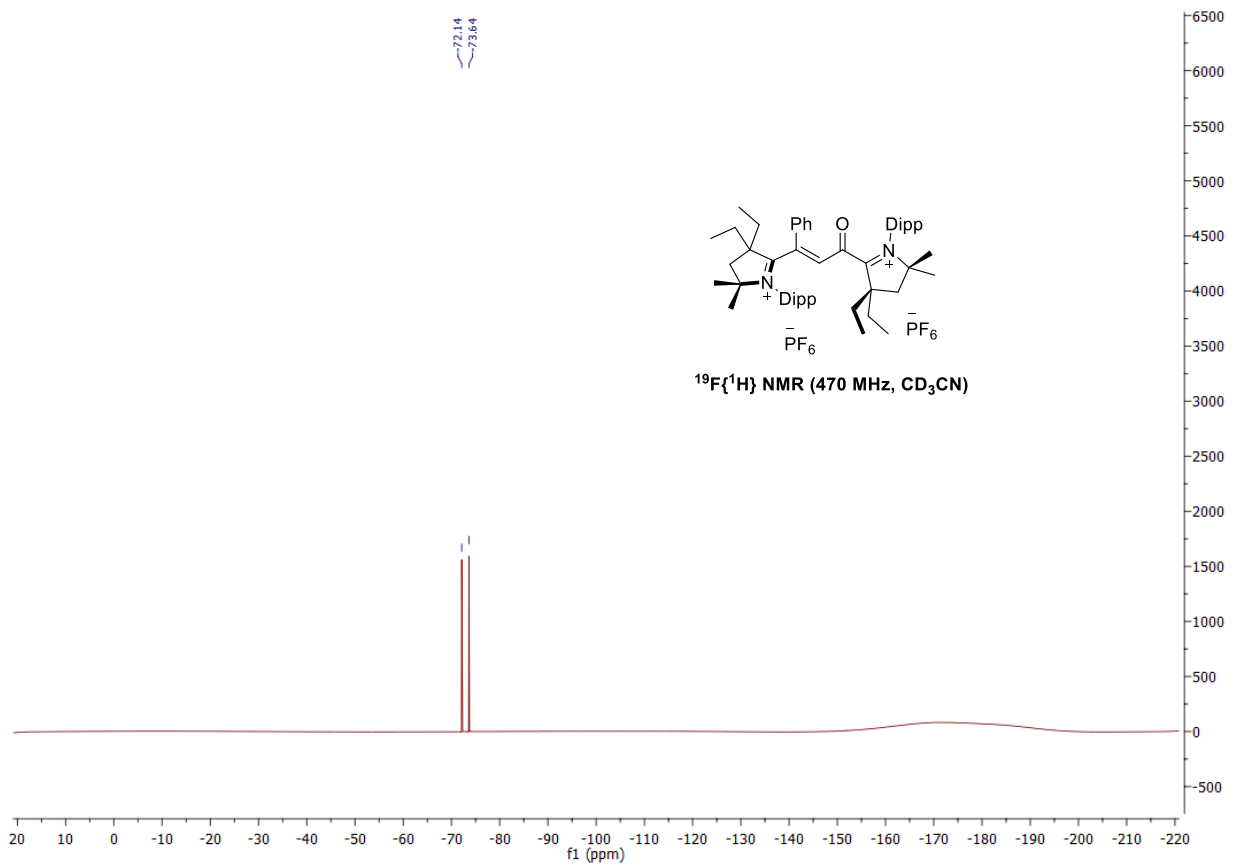

## References

---

- <sup>1</sup> a) J. K. Mahoney, D. Martin, C. E. Moore, A. L. Rheingold and G. Bertrand, *J. Am. Chem. Soc.*, 2013, **135**, 18766-18769. b) L. Zhou, D. Zhang, J. Hu, Y. Wu, J. Geng and X. Hu, *Organometallics*, 2021, **40**, 2643-2650.
- <sup>2</sup> Experimental EPR spectra were fitted with the EasySpin simulation package: S. Stoll and A. Schweiger, *J. Magn. Reson.*, 2006, **178**, 42-55.
- <sup>3</sup> CrysAlisPro 1.171.39.46 (Rigaku OD, 2018)
- <sup>4</sup> ShelXT: G.M. Sheldrick, *Acta Cryst.*, 2015, **A71**, 3-8.
- <sup>5</sup> Olex2: O. V. Dolomanov, L. J. Bourhis, R. J. Gildea, J. A. K. Howard and H. Puschmann, *J. Appl. Cryst.*, 2009, **42**, 339-341.
- <sup>6</sup> ShelXL: G.M. Sheldrick, *Acta Cryst.*, 2015, **C71**, 3-8.
- <sup>7</sup> Gaussian 09, Revision D.01, M. J. Frisch, G. W. Trucks, H. B. Schlegel, G. E. Scuseria, M. A. Robb, J. R. Cheeseman, G. Scalmani, V. Barone, B. Mennucci, G. A. Petersson, H. Nakatsuji, M. Caricato, X. Li, H. P. Hratchian, A. F. Izmaylov, J. Bloino, G. Zheng, J. L. Sonnenberg, M. Hada, M. Ehara, K. Toyota, R. Fukuda, J. Hasegawa, M. Ishida, T. Nakajima, Y. Honda, O. Kitao, H. Nakai, T. Vreven, J. A. Montgomery, Jr., J. E. Peralta, F. Ogliaro, M. Bearpark, J. J. Heyd, E. Brothers, K. N. Kudin, V. N. Staroverov, R. Kobayashi, J. Normand, K., Raghavachari, A. Rendell, J. C. Burant, S. S. Iyengar, J. Tomasi, M. Cossi, N. Rega, J. M. Millam, M. Klene, J. E. Knox, J. B. Cross, V. Bakken, C. Adamo, J. Jaramillo, R. Gomperts, R. E. Stratmann, O. Yazyev, A. J. Austin, R. Cammi, C. Pomelli, J. W. Ochterski, R. L. Martin, K. Morokuma, V. G. Zakrzewski, G. A. Voth, P. Salvador, J. J. Dannenberg, S. Dapprich, A. D. Daniels, Ö. Farkas, J. B. Foresman, J. V. Ortiz, J. Cioslowski and D. J. Fox, Gaussian, Inc., Wallingford CT, 2009.
- <sup>8</sup> S. Grimme, J. Antony, S. Ehrlich and H. Krieg, *J. Chem. Phys.*, 2010, **132**, 154104.
- <sup>9</sup> NBO (Version 3.1), E. D. Glendening, A. E. Reed, J. E. Carpenter and F. Weinhold, Theoretical Chemistry Institute, University of Wisconsin, Madison, WI, 2001.
